# Supplementary material for: A universal way to enrich the nanoparticle lattices with polychrome DNA origami “homologs”
Source: PubMed Central journal article supplement — Sci Adv. 2022 Nov 23;8(47):eadc9755. doi: 10.1126/sciadv.adc9755 (PMC9683696; doi:10.1126/sciadv.adc9755), 2022-11-23
Supplement: sciadv.adc9755_sm.pdf [file sciadv.adc9755_sm.pdf]

Supplementary Materials for

**A universal way to enrich the nanoparticle lattices with polychrome DNA origami “homologs”**

Min Ji *et al.*

Corresponding author: Ye Tian, [ytian@nju.edu.cn](mailto:ytian@nju.edu.cn)

*Sci. Adv.* **8**, eadc9755 (2022)  
DOI: 10.1126/sciadv.adc9755

**This PDF file includes:**

DNA sequences  
Figs. S1 to S48  
Tables S1 to S9

## I. DNA Sequences

### a. Staples of regular octahedron

R\_oct\_staple\_1 TCAAAGCGAACCAGACCGTTTTATATAGTC  
R\_oct\_staple\_2 GCTTTGAGGACTAAAGAGCAACGGGGAGTT  
R\_oct\_staple\_3 GTAAATCGTCGCTATTGAATAACTCAAGAA  
R\_oct\_staple\_4 AAGCCTTAAATCAAGACTTGCGGAGCAAAT  
R\_oct\_staple\_5 ATTTAAGAAGCTGGCTTGAATTATCAGTGA  
R\_oct\_staple\_6 GTTAAAATTCGCATTATAAACGTAAACTAG  
R\_oct\_staple\_7 AGCACCATTACCATTACAGCAAATGACGGA  
R\_oct\_staple\_8 ATTGCGTAGATTTTCAAACAGATTGTTTG  
R\_oct\_staple\_9 TAACCTGTTTAGCTATTTTCGCATTCATTC  
R\_oct\_staple\_10 GTCAGAGGGTAATTGAGAACACCAAAATAG  
R\_oct\_staple\_11 CTCCAGCCAGCTTTCCCTCAGGACGTTGG  
R\_oct\_staple\_12 GTCCACTATTAAAGAACCAGTTTTGGTTCC  
R\_oct\_staple\_13 TAAAGGTGGCAACATAGTAGAAAATAATAA  
R\_oct\_staple\_14 GATAAGTCCTGAACAAGCTTTTAAAGAGAA  
R\_oct\_staple\_15 GGTAATAGTAAAATGTAAGTTTTACTAT  
R\_oct\_staple\_16 TCAGAACCGCCACCCTCTCAGAGTATTAGC  
R\_oct\_staple\_17 AAGGGAACCGAAGCTGAGCAGACGGTATCAT  
R\_oct\_staple\_18 GTAAAGATTCAAAGGCCTGAGTTGACCCT  
R\_oct\_staple\_19 AGGCGTTAAATAAGAAGACCGTGTCGCAAG  
R\_oct\_staple\_20 CAGGTCGACTCTAGAGCAAGCTTCAAGGCG  
R\_oct\_staple\_21 CAGAGCCACCACCCTCTCAGAAGCTCGAGAG  
R\_oct\_staple\_22 TTCACGTTGAAAATCTTGCGAATGGGATTT  
R\_oct\_staple\_23 AAGTTTTAACGGGGTTCGGAGGTGAGAATGG  
R\_oct\_staple\_24 TTGCGTATTGGGCGCCCGGGGTGCGCTC  
R\_oct\_staple\_25 GTCACCAGAGCCATGGTGAATTATCACCAATCAGAAAAGCCT  
R\_oct\_staple\_26 GGACAGAGTTACTTTGTCGAAATCCGCGTGTATCACCGTACG  
R\_oct\_staple\_27 CAACATGATTTACGAGCATGGAATAAGTAAGACGACAATAAA  
R\_oct\_staple\_28 AACCAGACGCTACGTTAATAAAACGAACATAACCACATTCAGG  
R\_oct\_staple\_29 TGACCTACTAGAAAAAGCCCCAGGCAAAGCAATTTTCATCTTC  
R\_oct\_staple\_30 TGCCGGAAGGGGACTCGTAACCGTGCATTATATTTTAGTTCT  
R\_oct\_staple\_31 AGAACCCCAAATCACCATCTGCGGAATCGAATAAAAATTTTT  
R\_oct\_staple\_32 GCTCCATTGTGTACCGTAACACTGAGTTAGTTAGCGTAACCT  
R\_oct\_staple\_33 AGTACCGAATAGGAACCCAAACGGTGTAACCTCAGGAGGTTT  
R\_oct\_staple\_34 CAGTTTGAATGTTTAGTATCATATGCGTAGAATCGCCATAGC  
R\_oct\_staple\_35 AAGATTGTTTTTTAAACCAAGAAACCATCGACCCAAAAACAGG  
R\_oct\_staple\_36 TCAGAGCGCCACCACATAATCAAATCAGAACGAGTAGTATG  
R\_oct\_staple\_37 GATGGTTGGGAAGAAAAATCCACCAGAAATAATTGGGCTTGA  
R\_oct\_staple\_38 CTCCTTAACGTAGAAACCAATCAATAATTCATCGAGAACAGA  
R\_oct\_staple\_39 AGACACCTTACGCAGAAGCTGGCATGATTTCTGTCCAGACAA  
R\_oct\_staple\_40 GCCAGCTAGGCGATAGCTTAGATTAAGACCTTTTTAACCTGT  
R\_oct\_staple\_41 CCGACTTATTAGGAACGCCATCAAAAATGAGTAACAACCCCA

R\_oct\_staple\_42 GTCCAATAGCGAGAACCAGACGACGATATTCAACGCAAGGGA  
R\_oct\_staple\_43 CAAAATACAATATGATATTCAACCGTTAGGCTATCAGGTAA  
R\_oct\_staple\_44 AACAGTACTTGAAAACATATGAGACGGGTCTTTTTTAATGGA  
R\_oct\_staple\_45 TTTACCGCATTAAAGTCGGGAAACCTGATTTGAATTACCCA  
R\_oct\_staple\_46 GAGAATAGAGCCTTACCGTCTATCAAATGGAGCGGAATTAGA  
R\_oct\_staple\_47 ATAATTAATTTAAAAAAGCTTTTTCAAACTTTTAACAAACGCC  
R\_oct\_staple\_48 GCACCCAGCGTTTTTTTATCCGGTATTCTAGGCGAATTATTCA  
R\_oct\_staple\_49 GGAAGCGCCACAAACAGTTAATGCCCCGACTCCTCAAGATA  
R\_oct\_staple\_50 GTTTGCCTATTCACAGGCAGGTCAGACGCCACCACACCACCC  
R\_oct\_staple\_51 CGCGAGCTTAGTTTTTCCCAATTCTGCGCAAGTGTAAGCCT  
R\_oct\_staple\_52 AGAAGCAACCAAGCCAAAAGAATACACTAATGCCAAAAGCTCC  
R\_oct\_staple\_53 ATTAAGTATAAAGCGGCAAGGCAAAGAACTAATAGGGTACC  
R\_oct\_staple\_54 CAGTGCCTACATGGGAATTTACCGTTCCACAAGTAAGCAGAT  
R\_oct\_staple\_55 ATAAGGCGCCAAAAGTTGAGATTTAGGATAACGGACCAGTCA  
R\_oct\_staple\_56 TGCTAAACAGATGAAGAAACCACCAGAATTTAAAAAAGGCT  
R\_oct\_staple\_57 CAGCCTTGGTTTTGTATTAAGAGGCTGACTGCCTATATCAGA  
R\_oct\_staple\_58 CGGAATAATTCAACCCAGCGCCAAAGACTTATTTTAACGCAA  
R\_oct\_staple\_59 CGCCTGAATTACCCTAATCTTGACAAGACAGACCATGAAAGA  
R\_oct\_staple\_60 ACGCGAGGCTACAACAGTACCTTTTACAAATCGCGCAGAGAA  
R\_oct\_staple\_61 CAGCGAACATTAAAAGAGAGTACCTTTACTGAATATAATGAA  
R\_oct\_staple\_62 GGACGTTTAATTTGACGAGAAACACCACCCTAATGCAGAT  
R\_oct\_staple\_63 AAAGCGCCAAAGTTTATCTTACCGAAGCCCAATAATGAGTAA  
R\_oct\_staple\_64 GAGCTCGTTGTAAACGCCAGGGTTTTCCAAAGCAATAAAGCC  
R\_oct\_staple\_65 AATTATTGTTTTTCATGCCTTTAGCGTCAGATAGCACGGAAAC  
R\_oct\_staple\_66 AAGTTTCAGACAGCCGGGATCGTCACCCTTCTGTAGCTCAAC  
R\_oct\_staple\_67 ACAAAGAAATTTAGGTAGGGCTTAATTGTATACAACGGAATC  
R\_oct\_staple\_68 AACAAAATAACTAGGTCTGAGAGACTACGCTGAGTTTCCCT  
R\_oct\_staple\_69 CATAACCTAAATCAACAGTTCAGAAAACGTCATAAGGATAGC  
R\_oct\_staple\_70 CACGACGAATTCGTGTGGCATCAATCTTTAGCAAATACG  
R\_oct\_staple\_71 CCTACCAACAGTAATTTTATCCTGAATCAAACAGCCATATGA  
R\_oct\_staple\_72 GATTATAAAGAAACGCCAGTTACAAAATTTACCAACGTCAGA  
R\_oct\_staple\_73 AGTAGATTGAAAAGAATCATGGTCATAGCCGGAAGCATAAGT  
R\_oct\_staple\_74 TAGAATCCATAAATCATTTAACAATTTCTCCCGGCTTAGGTT  
R\_oct\_staple\_75 AAAGGCCAAATATGTTAGAGCTTAATTGATTGCTCCATGAGG  
R\_oct\_staple\_76 CCAAAGGAAAGGACAACAGTTTCAGCGAATCATCATATTCC  
R\_oct\_staple\_77 GAAATCGATAACCGGATACCGATAGTTGTATCAGCTCCAACG  
R\_oct\_staple\_78 TGAATATTATCAAATAATGGAAGGGTTAATATTTATCCCAA  
R\_oct\_staple\_79 GAGGAAGCAGGATTCGGGTAAAATACGTAAAACACCCCCCAG  
R\_oct\_staple\_80 GGTTGATTTTCCAGCAGACAGCCCTCATTTCGTCACGGGATAG  
R\_oct\_staple\_81 CAAGCCCCACCCTTAGCCCCGGAATAGGACGATCTAAAGTTT  
R\_oct\_staple\_82 TGTAGATATTACGCGCGATCGGTGCGGGCGCCATCTTCTGG  
R\_oct\_staple\_83 CATCCTATTCAGCTAAAAGGTAAAGTAAAAGCAAGCCGTTT  
R\_oct\_staple\_84 CAGCTCATATAAGCGTACCCCGGTTGATGTGTCGGATTCTCC  
R\_oct\_staple\_85 CATGTCACAAACGGCATTAAATGTGAGCAATTCGCGTTAAAT

R\_oct\_staple\_86 AGCGTCACGTATAAGAATTGAGTTAAGCCCTTTTTAAGAAAG  
R\_oct\_staple\_87 TATAAAGCATCGTAACCAAGTACCGCACCGGCTGTAATATCC  
R\_oct\_staple\_88 ATAGCCCGCGAAAATAATTGTATCGGTTCCGCCGACAATGAGT  
R\_oct\_staple\_89 AGACAGTTCATATAGGAGAAGCCTTTATAACATTGCCTGAGA  
R\_oct\_staple\_90 AACAGGTCCCGAAATTGCATCAAAAAGATCTTTGATCATCAG  
R\_oct\_staple\_91 ACTGCCCTTGCCCCGTTGCAGCAAGCGGCAACAGCTTTTTCT  
R\_oct\_staple\_92 TCAAAGGGAGATAGCCCTTATAAATCAAGACAACAACCATCG  
R\_oct\_staple\_93 GTAATACGCAAACATGAGAGATCTACAACACTAGCTGAGGCCGG  
R\_oct\_staple\_94 GAGATAACATTAGAAGAATAACATAAAAAGGAAGGATTAGGA  
R\_oct\_staple\_95 CAGATATTACCTGAATACCAAGTTACAATCGGGAGCTATTTT  
R\_oct\_staple\_96 CATATAACTAATGAACACAACATACGAGCTGTTTCTTTGGGG  
R\_oct\_staple\_97  
ATGTTTTGCTTTTGATCGGAACGAGGGTACTTTTTCTTTTGATAAGAGGTCATT  
R\_oct\_staple\_98  
GGGGTGCCAGTTGAGACCATTAGATAACAATTTTCACTGTGTGAAATTGTTATCC  
R\_oct\_staple\_99  
CTTCGCTGGGCGCAGACGACAGTATCGGGGCACCGTCGCCATTCAGGCTGCGCA  
R\_oct\_staple\_100  
TCAGAGCTGGGTAAACGACGGCCAGTGCGATCCCCGTAGTAGCATTAAACATCCA  
R\_oct\_staple\_101  
TTAGCGGTACAGAGCGGGAGAATTAAGTGCCTAATTTTCGGAACCTATTATTCT  
R\_oct\_staple\_102  
GATATTCTAAATTGAGCCGGAACGAGGCCCAACTTGCGCATAGGCTGGCTGAC  
R\_oct\_staple\_103  
TGTCGTCATAAGTACAGAACCGCCACCCATTTTCACAGTACAACTACAACGCC  
R\_oct\_staple\_104  
CGATTATAAGCGGAGACTTCAAATATCGCGGAAGCCTACGAAGGCACCAACCTA  
R\_oct\_staple\_105  
AACATGTACGCGAGTGGTTTGAAATACCTAAACACATTCTTACCAGTATAAAGC  
R\_oct\_staple\_106  
GTCTGGATTTTGCCTTTTAAATGCAATGGTGAGAAATAAATTAATGCCGGAGAG  
R\_oct\_staple\_107  
GCCTTGAATCTTTCCGGAACCGCCTCCCAGAGCCCAGAGCCGCCGCCAGCATT  
R\_oct\_staple\_108  
CGCTGGTGCTTTCCTGAATCGGCCAACGAGGGTGGTGATTGCCCTTCAACGCCT  
R\_oct\_staple\_109  
TGATTATCAACTTTACAACATAAGGAATCCAAAAGTTTGAGTAACATTATCAT  
R\_oct\_staple\_110  
ACATAACTTGCCCTAACTTTAATCATTGCATTATAACAACATTATTACAGGTAG  
R\_oct\_staple\_111  
GTAGCGCCATTAAATTGGGAATTAGAGCGCAAGGCGCACCGTAATCAGTAGCGA  
R\_oct\_staple\_112  
TTATTTTACCGACAATGCAGAACGCGCGAAAAATCTTTCCTTATCATTCCAAG  
R\_oct\_staple\_113



TTTCAATAGAAGGCAGCGAACCTCCCGATTAGTTGAAACAATAACGGATTTCGCC  
 R\_oct\_staple\_114  
 GGGCGACCCCAAAGTATGTTAGCAAACCTAAAAGAGTCACAATCAATAGAAAAT  
 R\_oct\_staple\_115  
 AGCCGAAAGTCTCTCTTTTGATGATACAAGTGCCTTAAGAGCAAGAAACAATGA  
 R\_oct\_staple\_116  
 GTGGGAAATCATATAAATATTTAAATTGAATTTTTGTCTGGCCTTCCTGTAGCC  
 R\_oct\_staple\_117  
 CCCACGCGCAAATGGTTGAGTGTTGTTTCGTGGACTTGCTTTCGAGGTGAATTT  
 R\_oct\_staple\_118  
 ATGACCACTCGTTTGGCTTTTGCAAAAGTTAGACTATATTCATTGAATCCCCCT  
 R\_oct\_staple\_119  
 TCCAAATCTTCTGAATTATTTGCACGTAGGTTAACGCTAACGAGCGTCTTTCC  
 R\_oct\_staple\_120  
 GGGTTATTTAATTACAATATATGTGAGTAATTAATAAGAGTCAATAGTGAATTT

**b. Staples of elongated octahedron**

E\_oct\_staple\_1 CTCGTTTACCAGACGACAACACTAAAGATT  
 E\_oct\_staple\_2 AAAAGGGACATTCTGGTCACACGTTGCAAC  
 E\_oct\_staple\_3 GCCACTACGAAGGCACGGGTAAAGCGAAAG  
 E\_oct\_staple\_4 TTGGGGCGCGAGCTGATTAGCTATTCCATA  
 E\_oct\_staple\_5 TTCAAATATATTTTAGAACGCGACCTCCGG  
 E\_oct\_staple\_6 CAATATAATCCTGATTGATGATGATTTTAA  
 E\_oct\_staple\_7 CAGACTGTAGCGCGTTAGTTTGCCAGTAG  
 E\_oct\_staple\_8 GTCCACTATTAAGAACCAGTTTTGGTTCC  
 E\_oct\_staple\_9 GAATAATAATTTTTTCCAATAATAACGAT  
 E\_oct\_staple\_10 GGCCGATTAAAGGGATCGGGAGCCCGCCGC  
 E\_oct\_staple\_11 GCCTCTTCGCTATTACAGGGCGAGCACCGC  
 E\_oct\_staple\_12 AAGCCAGAATGGAAAGAAATAAACAGAGCC  
 E\_oct\_staple\_13 CCAGACGACGACAATAGGTAAAGCTCAACA  
 E\_oct\_staple\_14 TACCCAAATCAACGTAAGAACCGACGGTCA  
 E\_oct\_staple\_15 TTGCGCTCACTGCCCCACTCACACATGGTC  
 E\_oct\_staple\_16 AATTACATTTAACAATTCAAGAAATTGCTT  
 E\_oct\_staple\_17 GCCATCAAAAATAATTTTTAACCTAATCAG  
 E\_oct\_staple\_18 AGTCAAATCACCATCAGAGAAAGTTTCAAC  
 E\_oct\_staple\_19 AACAAAGTCAGAGGGTTTAACTGTTATCCC  
 E\_oct\_staple\_20 TTATTTTGTACAAATCACACCACACGCAGT  
 E\_oct\_staple\_21 ATCTGGTCAGTTGGCACAAACCCAGTATTA  
 E\_oct\_staple\_22 TAAGTATAGCCCGGAAGTCGAGAAAACATG  
 E\_oct\_staple\_23 AGCGAACCAGACCGGATTAATTCGTCAGAA  
 E\_oct\_staple\_24 GACTTGCGGGAGGTTTTTTTAGCTTACCGC  
 E\_oct\_staple\_25 ACAGCATGCTCCATAGATTTGTATCATCCCCAGCGAAACGAA  
 E\_oct\_staple\_26 GAAATCGGCCCCCTACGGGGTCAGTGCCCTTTTGATCCAACG

E\_oct\_staple\_27 AACGGGTCCTGAACAAGAAAAATAATATCTTATCATTCCAAG  
E\_oct\_staple\_28 AAAAGCCCTCAGGACGTTGGTGTAGATGGGGAACAGGCCTTC  
E\_oct\_staple\_29 ATTAAATCAGCTTTCATCAACATTAATTTGTTAAAATTCGC  
E\_oct\_staple\_30 TACATTTAATAGTACATCCAATAAATCAAAGCTAACCAAAAA  
E\_oct\_staple\_31 GCCCAATTTTGCCATAACGAGCGTCTTTGCACCCATTAAATC  
E\_oct\_staple\_32 ATAGCGAAATTACGTAGGAATACCACATCAGTACAGTACCGT  
E\_oct\_staple\_33 GTTGGGATGAAAGAGGACAGATGAACGGAGTAGATCATTAGA  
E\_oct\_staple\_34 CTTTTTCAAAGAATACTCATCTTTGACCGCCTGATGAAATCC  
E\_oct\_staple\_35 AAGCCTGCGTGCCAGCTGCATTAATGAAAAGCATAAAGTGTA  
E\_oct\_staple\_36 TCAGTGATCATCAAGAACTGACCAACTTAGAAAAATCTACGT  
E\_oct\_staple\_37 TAACAGTACCCTGTAGCCTCAGAGCATATACAGGCGCATCAA  
E\_oct\_staple\_38 CTAATGCGAATATAAGAATCGCCATATTTACCGCACTCATCG  
E\_oct\_staple\_39 ATAGCTGTTGCCCGGGCAACAGCTGAATTGGGCGTCGGGA  
E\_oct\_staple\_40 GCCGCCATGTAGCGGGAAGGGAAGAAAGAGAGCTTTCTGAAT  
E\_oct\_staple\_41 GGAATTAATGGAECTACCATATCAAACGTCAGAGTAACAG  
E\_oct\_staple\_42 TCTGAATTCATCATTATCATTTTGCGGTAATACATGAATGG  
E\_oct\_staple\_43 AGAGGCAATGAGGAAGGGTAGCAACGGCAGGTGTCAAATTCC  
E\_oct\_staple\_44 CGTTCTATAGGTAATTTTAGAACCCCTCAAGGATGAACGGTAA  
E\_oct\_staple\_45 TTCTACTCGCAAATCAATTCTGCGAACGTGTTGTAATCGGTA  
E\_oct\_staple\_46 AGGAAAACCAGCAGACTGATAGCCCTAAACAATATAGATAGA  
E\_oct\_staple\_47 GAGCCGGTCGTAAGAAAGCGGCCAACGCTGATCGTGCTCAAG  
E\_oct\_staple\_48 AAACAGGAGATAACCCACAAGAATTGAGAGAGAATAACATAA  
E\_oct\_staple\_49 GTGCATCACAACCCGTCGGATTCTCCGTGGCGCATCGTAACC  
E\_oct\_staple\_50 CTAAAGTAGCCGCACAATGACAACAAGTGAATTTAAATCTC  
E\_oct\_staple\_51 AATCCAACAAAAGAAAGTAAGCAGATAGAATAGCACGCTAAT  
E\_oct\_staple\_52 TAACGTGAGAATCCGTGAGTGAATAACCACATAGCGATAGCT  
E\_oct\_staple\_53 GGATTATTGACCTGAATACGTGGCACAGAACATCGTACCGAA  
E\_oct\_staple\_54 GTACGCCCTTTCCTTACAGGGCGCGTACAGAGTCAATAGTGA  
E\_oct\_staple\_55 ATCATTTGAAAGGAGCGGGAATAGCCCGCGAAAAAGCGTCA  
E\_oct\_staple\_56 TTAATTGATATAATGCTGTGGAAGCCCGATTAGAGAAGGCGA  
E\_oct\_staple\_57 ATCATAAACGAACTATGCGATTTTAAGAATGGTTTTGCTCAT  
E\_oct\_staple\_58 AAGCATCGAGGAAGATATCTTTAGGAGCGAAGTATAACAAT  
E\_oct\_staple\_59 AAAGTATTCAAAAAGTCATAAATATCAAAATGTTATCACCG  
E\_oct\_staple\_60 GCAAGGAACTAGCAGAGAGTCTGGAGCATTTTTGAATTCAAC  
E\_oct\_staple\_61 ATCAGAGGAAGCGCACGATTTTTTTGTTTACGCAATAATAACG  
E\_oct\_staple\_62 CACCATTACCACCCGCCTCCCTCAGAGCTAATCAAGCATTTT  
E\_oct\_staple\_63 TTTGCTAAAAGCGTTTATTTTTGTATCGGATACCATATGAAAT  
E\_oct\_staple\_64 TAATGTGGCTGATAAATTATGCTATTTTCCGCAATGCCTGAG  
E\_oct\_staple\_65 TAGATTAATATATTGAGAAGTGTTTTTTGGACGAGCACGTA  
E\_oct\_staple\_66 CGAGGAAAACGTCAAAAATGAAAATAGCTACAGAGCTAAAGA  
E\_oct\_staple\_67 ATGTTAGTTATACACCGGAATCATAATTGACCGTGAATTCAT  
E\_oct\_staple\_68 CAAAAGGGAGGCTTGCCACCCTCAGAACAACCCATAACTACA  
E\_oct\_staple\_69 AAGATTAGTATTCTAAATCAGATATAGATATATTTTAAATAG  
E\_oct\_staple\_70 AACCGATTTTATCAGCTTGCTTTCGAGGCATCGCCACGCAT

E\_oct\_staple\_71 CAAAAAACGGAGTGTCTTTCCAGACGTTCTGAGGCTTGCAGG  
E\_oct\_staple\_72 TCGGTTCGAGTAAATGAATTTTCTGTATGGTCACCACGATAGC  
E\_oct\_staple\_73 CAGACCAAATTAAGTAGCCACCAGAACGGTTGACTTAGTAC  
E\_oct\_staple\_74 CAGAGGCAAAGAACGGGTTTAGATAAGTATAACCAGAAACCTA  
E\_oct\_staple\_75 GTTTCAGAAGGCTCCAAAAGGAGCCTTTAACAACTTTCAACA  
E\_oct\_staple\_76 AACCTGTGGGTGCCTGTGAAATTGTTATCAGCAAGCGGTCCA  
E\_oct\_staple\_77 CAGAAGGAATAAGAGCAAGAAACAATGACCGAACAAAGTTAC  
E\_oct\_staple\_78 TTTACAGTTAAAACACACTAAGCCCAATAAGAGGAGCTTTAC  
E\_oct\_staple\_79 GTAGGGCGCAAGCCATCGGCTGTCTTTCCCATCCTGTTTACG  
E\_oct\_staple\_80 AAGTTTGTACATCGATTTTCAGGTTTAATTATTTGTTATACT  
E\_oct\_staple\_81 ACTTGCCATAATCAACAGTACATAAATCAGATTTCTATTAC  
E\_oct\_staple\_82 TAATATTGTCTAAAGTTATGAGCGAGTATGATGAAAGCAACC  
E\_oct\_staple\_83 ATGGTTTACATATAAGAAAATACATACAAACTGTTTAGTATC  
E\_oct\_staple\_84 CGGTCATTAATCAGGCAAGGCCGGAACCGAACCGCTCAGAT  
E\_oct\_staple\_85 ACCCTTCTTACATTTGGAAATACCTACAATAAAAACCATTAC  
E\_oct\_staple\_86 CAGTTCAGAGAAGGATTAGTTTCGTCACTCAACTAATAACGC  
E\_oct\_staple\_87 GGTTCAGGAAAGACTATCAAAAAGATTAACACCTGCAGGTCGA  
E\_oct\_staple\_88 TGAGCAAATGGAAGTGAGGCCACCGAGTTAGTAACTATCGG  
E\_oct\_staple\_89 AGAGTTGCCGCTCACAATTCCACACAACCTTTTGACCTGAAAT  
E\_oct\_staple\_90 AGCACCGAGCCCCCTTGCCATCTTTTCACGCCACCCACCCT  
E\_oct\_staple\_91 CTTTTTTAAGAAGACAAAATCGCGCAGAACTCAAATAACATC  
E\_oct\_staple\_92 AGGAATTACCTTGCAGTGCCACGCTGAGACTTTACTAGACGT  
E\_oct\_staple\_93 CCAGTCAGAGTAGTAAATTGGGCTTGAGACTGGCTCATTATA  
E\_oct\_staple\_94 GCAAAGCGGATCCCACGACGGCCAGTGCGGGTAACTCCAACA  
E\_oct\_staple\_95 AACACTGCAGAACCTTGCAAAAAGAAGTTTAGATACATGCAAA  
E\_oct\_staple\_96 CCACCCTAGGATTAGCGGGGTTTTGCTCGAGGTTTAGGGGGT  
E\_oct\_staple\_97 GCTGAGATATGGTTGCTTTAGTAGAAGAGGCGAATAATTACC  
E\_oct\_staple\_98 AGTTTGAAAGCAAATATTTAAATTGTAAAGCCAGCAAATCTA  
E\_oct\_staple\_99 GCTTAATAAAATCATAGAATCCTTGAAATTGCTTCAGGAACG  
E\_oct\_staple\_100 TCAAAGGGAGATAGCCCTTATAAATCAAAGGCCCGTATAAAC  
E\_oct\_staple\_101 TTCTGGTATGCAACAGCTTAATTGCTGACTCCTTTGGCGAAA  
E\_oct\_staple\_102 AATAAGAAGAACGCGCCTGTTTATCAACATTTTCGAGCCAGT  
E\_oct\_staple\_103 CTTAGGTGAGCCATGACGGAAATTATTCGCGACATCATCTTC  
E\_oct\_staple\_104 AAATACCACTAGAAAAAGCTGCTGATGCAATTTAACCAAAGA  
E\_oct\_staple\_105 TGAATACGGTAATACAATACTTCTTTGATAAAAGAGAATTAC  
E\_oct\_staple\_106 TGACCTAAAATCCATATAACTATATGTATATTATCACCGTCA  
E\_oct\_staple\_107 CTGTAGCTTTTGTTTCAGGAAGATTGTATGGGGACGACGACAG  
E\_oct\_staple\_108 GGGGGATCAGGCTGACCAGGCAAAGCGCGAAGCTCAACATGT  
E\_oct\_staple\_109 ACACCGCCTCGTATCATTTGAGGATTTAACTAACAAGTTGAA  
E\_oct\_staple\_110 CTGGCCCGCGGGGAGAGGCGGTTTGCGTTTGCCCTTCACCGC  
E\_oct\_staple\_111 TACTCAGAGTACCACTGAGACTCCTCAAGAAAACGAGAATGA  
E\_oct\_staple\_112 AATAGTATTGAATCCCCCTCAAATGCTTTTGCCAGAGTACCG  
E\_oct\_staple\_113 CAAAAGGATTAAGGTGAAAAGGTGGCAACCAGCGTGGTTTG  
E\_oct\_staple\_114 TTACCGTTTGGCCTCAGGAGGTTGAGGCAAGCGCTAGGGCGC

E\_oct\_staple\_115 TACATGGTTGAGTAACAGTGTTCAGACGATCCAGTAACCGTCT  
E\_oct\_staple\_116 TTAAGTTCAAGCTTGCATGTTCCGATTGTGCTGCAGTACCT  
E\_oct\_staple\_117 TTATCCGGTATGCCGGAGAGGGTAGCTAAACAAGAGAATCGC  
E\_oct\_staple\_118 CTGACCTATAAGGCTTGCCCTGACGAGAGGGCGCATAGGCTGG  
E\_oct\_staple\_119 AACCAAGTAACAACGCCAACATGTAATTAACAAAGAAGGAGC  
E\_oct\_staple\_120 CATCAGTTAGCATTGCAAGCCCAATAGGCGCCACCAACCAAA  
E\_oct\_staple\_121  
AGTTAATGCAAAATGGTTGAGTGTTCGTTGTTTCGTTGGACTGATACAGGAGTGTACTGG  
E\_oct\_staple\_122  
GAATACCATAAGAAATTAGACGGGAGAAAATTGAGATAGCTATCTTACCGAAGC  
E\_oct\_staple\_123  
GCGACCTCGGAACGAGTTTCCATTAAACCAACCTAATTATACCAAGCGCGAAAC  
E\_oct\_staple\_124  
TATCGGCCCAAAAAAATCAGCTATTTTCGCGTCTAACGGCGGATTGACCGTAA  
E\_oct\_staple\_125  
TCGTAAATAAAAAATAGATTCAAAAGGGTATATGATGAGATCTACAAAGGCTATC  
E\_oct\_staple\_126  
CATTATGTGATTCCGGTCAATAACCTGTAAAGGTGAAGGCAAAGAATTAGCAAA  
E\_oct\_staple\_127  
AGAACAATTAATTGAAGTACCGACAAAAACAACATAATTTACGAGCATGTAGA  
E\_oct\_staple\_128  
ATATGCGCAAACGTAAAGAAACGCAAAGAATAGAATGATAAATAAGGCGTTAAA  
E\_oct\_staple\_129  
CCGACTTTGGGTTAATCGCAAGACAAAGTTAATTTTCAACCGATTGAGGGAGGG  
E\_oct\_staple\_130  
ACGCCTGTGAGATTAGGCATAGTAAGAGCGATAAACTCAGAGCCACCACCCTCA  
E\_oct\_staple\_131  
CGCTGGTTTTTCTGTAATGAGTGAGCTACTTTCCAGCCAGGGTGGTTTTTCTTT  
E\_oct\_staple\_132  
CGAACCAACGCTCAGGCAGATTCACCAGCCAACAGTTTTGAATGGCTATTAGTC  
E\_oct\_staple\_133  
TAATAAAGGGAACCGAGTAATCTTGACAACAAAGCAATTTCAACTTTAATCATT  
E\_oct\_staple\_134  
CCTTGCTCAAGTTATGATGAAACAAACATTCATTTGTCTGTCCATCACGCAAAT  
E\_oct\_staple\_135  
GAGTTAATTTGTGCGAGAATAGAAAGGAAACGTTGACTTAAACAGCTTGATACCG  
E\_oct\_staple\_136  
TGGCAAGGCATTGATGATATTCACAAACCGCAGTCGACGGGGAAAGCCGGCGAA  
E\_oct\_staple\_137  
TCGACAACCTGCAACTGAACCTCAAATATAATCAACACTAATAGATTAGAGCCGT  
E\_oct\_staple\_138  
AGCCTAAAGCAAGCAAGAACGCGAGGCGTGAAGCCGCTACAATTTTATCCTGAA  
E\_oct\_staple\_139  
CAGAGCCACCATTATAGCGACAGAATCATTTCATCGAATCACCGGAACCAGAGCC

E\_oct\_staple\_140  
TACCTTTAGTAACAATTCCTGATTATCAGTTTGGACACGTAAAACAGAAATAAA  
E\_oct\_staple\_141  
CTCTAGAGGATTGCTCAAATATCGCGTTAGCAAACGCCAGGGTTTTCCAGTCA  
E\_oct\_staple\_142  
TTTAAATGCCGGAACGCAACTGTTGGGAGCCAGCTTGATAAGAGGTCATTTTTG  
E\_oct\_staple\_143  
ATTTATCGCGCCGCGTTAGAATCAGAGTTTAGACTGTAAATCGTCGCTATTAA  
E\_oct\_staple\_144  
CCATAAATAAGAGGGGCGGATAAGTGCCTAGGTGTTAGACTGGATAGCGTCCAA

**c. Staples of partially elongated octahedron**

P\_oct\_staple\_1 TGAGGACTAAAGACTTACGGCTAGTTAAAG  
P\_oct\_staple\_2 AGCGAACCAGACCGGATTAATTCGTCAGAA  
P\_oct\_staple\_3 GAATTAGAGCCAGCAAGACTTGACCGATTG  
P\_oct\_staple\_4 AACAAAGAAACCACCACATTATCATTAGA  
P\_oct\_staple\_5 TCATTTTCAGGGATAGCTCAGAGGTGTATC  
P\_oct\_staple\_6 CTCATTATAACCAGTCACGATTTTAGAACGA  
P\_oct\_staple\_7 AACCGCCTCCCTCAGACCAGAGCATCGGCA  
P\_oct\_staple\_8 TCCGGCTTAGGTTGGGGACTACCCTTAGAA  
P\_oct\_staple\_9 TATTAACACCGCCTGCGAGGTGATGGCTAT  
P\_oct\_staple\_10 CGTTGAAAATCTCCAAAATAATATTTTGCT  
P\_oct\_staple\_11 AGTCAAATCACCATCAGAGAAAGTTTCAAC  
P\_oct\_staple\_12 AATCATAAGGGAACCGCGAGGCGCGGAAA  
P\_oct\_staple\_13 TTTGCAAAAGAAGTTTAAAATAGAGGAATT  
P\_oct\_staple\_14 TTGCGCTCACTGCCCGACTCACACATGGTC  
P\_oct\_staple\_15 GCCTCTTCGCTATTACAGGGCGAGCACCGC  
P\_oct\_staple\_16 GTCCACTATTAAAGAACCAGTTTTGGTTCC  
P\_oct\_staple\_17 ATAGCAGCCTTTACAGAACGTCACTGAATC  
P\_oct\_staple\_18 GCGGAATTATTCATTTTACAAAATTTAACG  
P\_oct\_staple\_19 GCCATCAAAAATAATTTTTAACCTAATCAG  
P\_oct\_staple\_20 GTTAGCAAACGTAGAACCTTATTTACCAGA  
P\_oct\_staple\_21 ATTTAACAACGCCAACAATTGAGTCATAAT  
P\_oct\_staple\_22 GAGTAACAGTGCCCGTACGGGGTTGGAAAG  
P\_oct\_staple\_23 TTGGGGCGCGAGCTGATTAGCTATTCATA  
P\_oct\_staple\_24 TTATTTTCATCGTAGGAACAAGCCAATAAT  
P\_oct\_staple\_25 AAAATCTATCATTGTTGAGATGGTTTAAAGTAGATTTAGTAG  
P\_oct\_staple\_26 AACCGCCTCATAATCCCCTTATTAGCGTCGAAGCCTTAAATC  
P\_oct\_staple\_27 AAACAACCTCAAAAACCCTCAAATGCTTTCCAATACGCTCCAA  
P\_oct\_staple\_28 TTCCATTAGCATCGATCGTCACCCTCAGAGCGTCATACATCA  
P\_oct\_staple\_29 CCAATAGCCAAGTATATCATTCCAAGAATTGACGATTGGCCT  
P\_oct\_staple\_30 GCCGCTTACTCATCAAGAGGCAAAAGAAATACGTAAGGAAGT  
P\_oct\_staple\_31 CTGGCCCGCGGGGAGAGGCGGTTTGCCTTTCACCGC

P\_oct\_staple\_32 TAGTCTTCCATCCTGTTTCAGCTAATGCATAAAGTACCACGCT  
P\_oct\_staple\_33 GTTTCGTAGCGTAACGATCCTCAGAACCTACCGTAACCGTCT  
P\_oct\_staple\_34 GAAAGAGCTCCATGGATTTGTATCATCGTTGTAACAAAGCTG  
P\_oct\_staple\_35 TCCTTGAAATAAGGTCTTCTGACCTAAAGCGAGAACTATAT  
P\_oct\_staple\_36 GTTATCTAGCATCACCAGTAATAAGAGAATATTCTTACAAAG  
P\_oct\_staple\_37 AGGAAACACCAGCGAATCAATAGAAAATAAACGCAACATAAA  
P\_oct\_staple\_38 GAACGAAAGCAGCAGTACCGACAAAAGGGAACGCGCCTGTTT  
P\_oct\_staple\_39 ATAGAAGCGGGAGGTTTTGGGTATTAAACAAGCAAGAGCCAC  
P\_oct\_staple\_40 AAAGAAGTGATTGCAGTAACAGTACCTTACTGTGAATATAGT  
P\_oct\_staple\_41 ATCAACAATATAAAAATGAAAAATCTAAAAATTA AAAATACC  
P\_oct\_staple\_42 TTCTGGTATGCAACAGCTTAATTGCTGACTCCTTTGGCGAAA  
P\_oct\_staple\_43 ATAGTAATACCAGAGAGCAACACTATCAGAAACCATCGCCCA  
P\_oct\_staple\_44 TTTTCGGGTTGCTAAACCTCCCGACTTGGCTTATCCCCTCAG  
P\_oct\_staple\_45 GAAAGACAACCTATTATTCTGAAACATGTTTGCTCAGTACGC  
P\_oct\_staple\_46 GAGCCGGTCTCAGAGATTAGGCCAACGCTGTCCTTTTAAAAG  
P\_oct\_staple\_47 TAACAGTACCCTGTAGCCTCAGAGCATATACAGGCGCATCAA  
P\_oct\_staple\_48 AATCCAAGAAGCGCATTAGACGGGAGAAATATTATTTATCCC  
P\_oct\_staple\_49 TAATGTGGCTGATAAATTAATATAAAAAGTCGCAATGCCTGAG  
P\_oct\_staple\_50 TTACCAATTAAGAATGAGTTAAGCCCAAATTGAGAACATAA  
P\_oct\_staple\_51 GGTCAGGAAAGACTATCAAAAAGATTAACACCTGCAGGTCGA  
P\_oct\_staple\_52 TTAAGTTCAAGCTTGCATGTTTCGCCATTGTGCTGCAGTACCT  
P\_oct\_staple\_53 CCCCCTGGTGTACTTTACCGTTCAGTACACAGGCGGATAAG  
P\_oct\_staple\_54 ATAGCGTAAACAGTTCAGAACCCCTCGTTAATGTTTTGTATCG  
P\_oct\_staple\_55 ATTCGCCATGATGAAAGAAAACAAAATTTAAATCAGTGAATA  
P\_oct\_staple\_56 AAACAGGATAAGAAGAGCGTCTTTCCAGGCTATCTTACCGAA  
P\_oct\_staple\_57 AGAGTTGCCGCTCACAATTCACACAACACTCGTATGCCCCGA  
P\_oct\_staple\_58 AACCTGTGGGTGCCTGTGAAATTGTTATCAGCAAGCGGTCCA  
P\_oct\_staple\_59 GTAGTAAACATTCATCATCAGTTGAGATACGAACTGGGAAGA  
P\_oct\_staple\_60 TACATTTAATAGTAGTAGCGTTAATAAATTTGACCATTAGA  
P\_oct\_staple\_61 ACGTTATTATTCCTTGATGGCAATTCATACCTACCTATTTGC  
P\_oct\_staple\_62 TTCTACTCGCAAATCAATTCTGCGAACGTTTTGTACCAAAAA  
P\_oct\_staple\_63 CGCAGTCGAGAGGGAGGATTAGCGGGGTAAAGTATGTTAATG  
P\_oct\_staple\_64 TAATATTGTACATCAACAAGAGCGAGTATGAAACAGGGAGCC  
P\_oct\_staple\_65 GTGCATCACAACCCGTCGGATTCTCCGTGGCGCATCGTAACC  
P\_oct\_staple\_66 ATAGCTGTTGCCCCCGGGCAACAGCTGAATTGGGCGTCGGGA  
P\_oct\_staple\_67 AACTTTAACATTAACATCCAATAAATCAAAGCTAAATCGGTC  
P\_oct\_staple\_68 ACCCAAACATGCCGAGAGGGTAGCTAAACAAGAGAATCAT  
P\_oct\_staple\_69 ATCATAACAGAGATAGAAGAATAGCCCGCGAAAAACACTGA  
P\_oct\_staple\_70 TCATTAACAGTGTACAGACCAGGCGCATACCCAAATCAACAT  
P\_oct\_staple\_71 AAAAGCCCTCAGGACGTTGGTGTAGATGGGGAACAGGCCTTC  
P\_oct\_staple\_72 ATAAAGCTTTCGAGCCTTGCTGAACCTCAGGAATTCTAACAA  
P\_oct\_staple\_73 AGGGAGGTTGCCTTGTAAATCAGTAGCGACCGGAAAAGTAGCA  
P\_oct\_staple\_74 CGGCTGTCACAAACCATTGACAGGAGGTAGAGCCGACCGCGC  
P\_oct\_staple\_75 AACAATGCCCTGAACAAAGTCAGAGGGTTAATAAGAGCAAGA

P\_oct\_staple\_76 TACTAGAATTAGAGAATCAACAGTTGAAAAATATCTTAGGCA  
P\_oct\_staple\_77 ACCGTAATAAGAATGGACATTCTGGCCAATTGGCAAATAGGA  
P\_oct\_staple\_78 GTTTATCGACAATGACAACGAATAGAACTTTAATAGACTGG  
P\_oct\_staple\_79 TTAATTGATATAATGCTGTGGAAGCCCGATTAGAGAAGGCCGA  
P\_oct\_staple\_80 ATCATCATAATTTTCAAACAATTCGACAATAAAATATATCAC  
P\_oct\_staple\_81 CACCCTCTGAGGCAGGTCAGCCATCTTTACCCTCAATCAGAT  
P\_oct\_staple\_82 TCAAAGGGGAGATAGCCCTTATAAATCAACCTAAAGTTTTGTC  
P\_oct\_staple\_83 ACGAGGCCCGATATCCGATAGTTGCGCCAGCTTGCGGGGGTA  
P\_oct\_staple\_84 AGTATTAACAGAAAATGGAAGGGTTAGACAATATACGGAATT  
P\_oct\_staple\_85 TGAATTTCTGATGCGCAAGACAAAGAACTTTAATGCCGACCG  
P\_oct\_staple\_86 CAAAGTAAGTGAATACCGGATATTCATTAGGCTGGCAACTTT  
P\_oct\_staple\_87 ATAAGTCTAAAACATCGCCAATATCTTTTTCGTTATAACCAGT  
P\_oct\_staple\_88 AGTTTGAAAGCAAATATTTAAATTGTAATTACATCATAACGG  
P\_oct\_staple\_89 AGCAATAAGCCTAATTTGCCAGTTACAATAAGACGTC AATAG  
P\_oct\_staple\_90 GAGAGCCCCACCAGCGAACTGATAGCCCCTGAACAAGAAAAA  
P\_oct\_staple\_91 ACCCATGGCCACCCGTTTAGTACCGCCAAACCCTTCTGACCT  
P\_oct\_staple\_92 AAGGAGCGGAACAAAGTTTCAGCGGAGTTAAAACGAGAATGA  
P\_oct\_staple\_93 CCATTACAGGTGAAAATATTGACGGAAACCTGATAAATTGGA  
P\_oct\_staple\_94 GGGGGATCAGGCTGACCAGGCAAAGCGCGAAGCTCAACATGT  
P\_oct\_staple\_95 TCAGATGTTCTGTAATGGAAACAGTACAAATTACACTGAGCA  
P\_oct\_staple\_96 CTGTAGCTTTTGTTCAGGAAGATTGTATGGGGACGACGACAG  
P\_oct\_staple\_97 ATTAAATCAGCTTTCATCAACATTAATTTGTAAAATTCGC  
P\_oct\_staple\_98 AACAGCCTTCAATCAAATCAACTGAACAAAAAGAGCTGAGAT  
P\_oct\_staple\_99 GAAATCGCAGACGTCAGCCCTCATAGTTCACCAGTTCCAACG  
P\_oct\_staple\_100 GAGGCATCAACGCTTGTTTAGTATCATAAGGAGCAGAGGAAG  
P\_oct\_staple\_101 GGTGGCAAGA ACTGACGCAATAATAACGTATATTTTAAATAT  
P\_oct\_staple\_102 CGACCTGGACAGATGAACGTTAGCAAGGCATGTTCGAAATCCG  
P\_oct\_staple\_103 GCAAGGA ACTAGCAGAGAGTCTGGAGCATTTTTGAATTCAAC  
P\_oct\_staple\_104 GTAAATGATCAAAAGCGATAGCTTAGATAAAAATAGTTTGTA  
P\_oct\_staple\_105 CGTTCTATAGGTAATTTTAGAACCCTCAGAGATGAACGGTAA  
P\_oct\_staple\_106 TACAGGACCTATTTTCGAAACGGGTAAATAGGCTTTTGATGA  
P\_oct\_staple\_107 AAGCCTGCGTGCCAGCTGCATTAATGAAAAGCATAAAGTGTA  
P\_oct\_staple\_108 GCAAAGCGGATCCCACGACGGCCAGTGCGGGTA ACTCCAACA  
P\_oct\_staple\_109  
CCATAAATTTCAAACCTAAAGGAATTGCGAAAAAAGTGCGGAATCGTCATAAATA  
P\_oct\_staple\_110  
CTAAA ACTTGCGGGGAACGAGGGTAGCATTTCATGATGCCACTACGAAGGCACC  
P\_oct\_staple\_111  
AAGATTATCATAGCCAAAATCACCGGAAGCCGCCACGGTATTCTAAGAACGCGA  
P\_oct\_staple\_112  
CTAATAGAAAAGCCCAACAGTAGGGCTTATGTAATAAACCTCAATCAATATCT  
P\_oct\_staple\_113  
TTTAAATGCCGGAACGCAACTGTTGGGAGCCAGCTTGATAAGAGGTCATTTTTG  
P\_oct\_staple\_114

GTCTTTTCGCAAAATGGTTGAGTGTGTTTCGTGGACACAACTACAACGCCTGTA  
P\_oct\_staple\_115  
GAAAGCGTCAGGAGTCAGAACCGCCACCCAAGCCCGATTACCAGTCACACGAC  
P\_oct\_staple\_116  
TCGTAAATAAAAATAGATTCAAAGGGTATATGATGAGATCTACAAAGGCTATC  
P\_oct\_staple\_117  
GAATACCATTGGGCTGAATTACCTTATGGGACGTAAACGGAACAACATTATTAC  
P\_oct\_staple\_118  
TGATATTCTTTCCCTCCGCACTCATCGAGAATCATTCCACCAGAACCACCACCAG  
P\_oct\_staple\_119  
TAATATCTAATGCGCAGAAGATAAAACAAACAGTGATTCTGTCCAGACGACGAC  
P\_oct\_staple\_120  
ACCTTGCAATATACTTTGAATACCAAGTCAATTACTTTAACAATTCATTTGAA  
P\_oct\_staple\_121  
ATCAAGTGAAGGTATTATCACCGTCACCAATCACCCGTCACCAATGAAACCATC  
P\_oct\_staple\_122  
TATCGGCCCAAAAAAATCAGCTCATTTTCGCGTCTAACGGCGGATTGACCGTAA  
P\_oct\_staple\_123  
GCCCTTTCGCTAACACGATTTTTTGTGTTAGAGAATCGCTAATATCAGAGAGATA  
P\_oct\_staple\_124  
CGCTGGTTTTCTGTAATGAGTGAGCTACTTTCCAGCCAGGGTGGTTTTTCTTT  
P\_oct\_staple\_125  
TGTGATAAAACATATCATAGGTCTGAGATTATATAAACTTTTTCAAATATATTT  
P\_oct\_staple\_126  
TGCCGTCTCTGAATGGTAATAAGTTTTAATAAACATAAGAGGCTGAGACTCCTC  
P\_oct\_staple\_127  
CATTATGTGATTCCGGTCAATAACCTGTAAAGGTGAAGGCAAAGAATTAGCAAA  
P\_oct\_staple\_128  
ACGTAAAGACTTTAAAAAGTTTGAGTAAGAAGGAGATCCTGATTGTTTGGATTA  
P\_oct\_staple\_129  
CGCATAAATAGTAACGACGATAAAAACCTGCCAGATTTTCGAGGTGAATTTCTTA  
P\_oct\_staple\_130  
CTCATTCCAACGGATTACTTAGCCGGAAAACCTGACCTGACCTTCATCAAGAGTA  
P\_oct\_staple\_131  
ATGGTTTCGAGGAAGCATGATTAAGACTAATACATAAGACACCACGGAATAAGT  
P\_oct\_staple\_132  
CTCTAGAGGATTGCTCAAATATCGCGTTAGCAAACGCCAGGGTTTTCCAGTCA

**d. Inner strands of regular octahedron**

R\_oct\_inner\_1  
ATCCATCACTTCATACTCTACGTTGTTGTTGTTGTTGTTGGGGTGCCAGTTGAGACCATT  
AGATACAATTTTCACTGTGTGAAATTGTTATCC  
R\_oct\_inner\_2



ATCCATCACTTCATACTCTACGTTGTTGTTGTTGTTGTTTCAGAGCTGGGTAAACGACG  
GCCAGTGCGATCCCCGTAGTAGCATTAAACATCCA

R\_oct\_inner\_3

ATCCATCACTTCATACTCTACGTTGTTGTTGTTGTTGTTTGTAGCGGTACAGAGCGGGAG  
AATTAAGTGCCTAATTCGGAACCTATTATTCT

R\_oct\_inner\_4

ATCCATCACTTCATACTCTACGTTGTTGTTGTTGTTGTTGATTATCAACTTTACAACATA  
AGGAATCCAAAAAGTTTGAGTAACATTATCAT

R\_oct\_inner\_5

ATCCATCACTTCATACTCTACGTTGTTGTTGTTGTTGTTGTAGCGCCATTAAATTGGGAA  
TTAGAGCGCAAGGCGCACCGTAATCAGTAGCGA

R\_oct\_inner\_6

ATCCATCACTTCATACTCTACGTTGTTGTTGTTGTTGTTAGCCGAAAGTCTCTCTTTTGA  
TGATAAAGTGCCTTAAGAGCAAGAAACAATGA

R\_oct\_inner\_7

ATCCATCACTTCATACTCTACGTTGTTGTTGTTGTTGTTGTGGGAAATCATATAAATATTT  
AAATTGAATTTTTGTCTGGCCTTCCTGTAGCC

R\_oct\_inner\_8

ATCCATCACTTCATACTCTACGTTGTTGTTGTTGTTGTTCCACGCGCAAATGGTTGAG  
TGTTGTTTCGTGGACTTGCTTTCGAGGTGAATTT

**e. Inner strands of elongated octahedron**

E\_oct\_inner\_1

ATCCATCACTTCATACTCTACGTTGTTGTTGTTGTTGTTAGCCTAAAGCAAGCAAGAAC  
GCGAGGCGTGAAGCCGCTACAATTTTATCCTGAA

E\_oct\_inner\_2

ATCCATCACTTCATACTCTACGTTGTTGTTGTTGTTGTTTCGTAAATAAAAATAGATTCA  
AAAGGGTATATGATGAGATCTACAAAGGCTATC

E\_oct\_inner\_3

ATCCATCACTTCATACTCTACGTTGTTGTTGTTGTTGTTTATATGCGCAAACGTAAAGAAA  
CGCAAAGAATAGAATGATAAATAAGGCGTTAAA

E\_oct\_inner\_4

ATCCATCACTTCATACTCTACGTTGTTGTTGTTGTTGTTCCGACTTTGGGTTAATCGCAA  
GACAAAGTTAATTTCAACCGATTGAGGGAGGG

E\_oct\_inner\_5

ATCCATCACTTCATACTCTACGTTGTTGTTGTTGTTGTTAGTTAATGCAAATGGTTGAG  
TGTTGTTTCGTGGACTGATACAGGAGTGTACTGG

E\_oct\_inner\_6

ATCCATCACTTCATACTCTACGTTGTTGTTGTTGTTGTTTGGCAAGGCATTGATGATATTC  
ACAAACCGCAGTCGACGGGGAAAGCCGGCGAA

E\_oct\_inner\_7

ATCCATCACTTCATACTCTACGTTGTTGTTGTTGTTGTTCTCTAGAGGATTGCTCAAATAT  
CGCGTTAGCAAACGCCAGGGTTTTCCAGTCA

E\_oct\_inner\_8

ATCCATCACTTCATACTCTACGTTGTTGTTGTTGTTGTTTTTAAATGCCGGAACGCAACT  
GTTGGGAGCCAGCTTGATAAGAGGTCATTTTTG

**f. Inner strands of partially elongated octahedron**

P\_oct\_inner\_1

ATCCATCACTTCATACTCTACGTTGTTGTTGTTGTTGTTATGGTTTCGAGGAAGCATGAT  
TAAGACTAATACATAAGACACCACGGAATAAGT

P\_oct\_inner\_2

ATCCATCACTTCATACTCTACGTTGTTGTTGTTGTTGTTTCGTAAATAAAAATAGATTCA  
AAAGGGTATATGATGAGATCTACAAAGGCTATC

P\_oct\_inner\_3

ATCCATCACTTCATACTCTACGTTGTTGTTGTTGTTGTTAAGATTATCATAGCCAAAATCA  
CCGGAAGCCGCCACGGTATTCTAAGAACGCGA

P\_oct\_inner\_4

ATCCATCACTTCATACTCTACGTTGTTGTTGTTGTTGTTTGATATTCTTTCCTCCGCACTC  
ATCGAGAATCATTCCACCAGAACCACCACCAG

P\_oct\_inner\_5

ATCCATCACTTCATACTCTACGTTGTTGTTGTTGTTGTTGTCTTTCGCAAATGGTTGAG  
TGTTGTTTCGTGGACACAACTACAACGCCTGTA

P\_oct\_inner\_6

ATCCATCACTTCATACTCTACGTTGTTGTTGTTGTTGTTGAAAGCGTCAGGAGTCAGAA  
CCGCCACCAAGCCCGATTACCAGTCACACGAC

P\_oct\_inner\_7

ATCCATCACTTCATACTCTACGTTGTTGTTGTTGTTGTTCTCTAGAGGATTGCTCAAATAT  
CGCGTTAGCAAACGCCAGGGTTTTCCAGTCA

P\_oct\_inner\_8

ATCCATCACTTCATACTCTACGTTGTTGTTGTTGTTGTTTTTAAATGCCGGAACGCAACT  
GTTGGGAGCCAGCTTGATAAGAGGTCATTTTTG

**g. Sticky ends for DNA origami octahedral 'homologs'**

**R\_oct\_1**

R\_oct\_1\_SE\_1

AAAGATTCATCAGGAATTACGAGGCATGCTCATCCTTATGCGTTTTTTTTTTTTTTTTTTT  
TTTTGAGTCTA

R\_oct\_1\_SE\_2

CTTCATCAAGAGAAATCAACGTAACAGAGATTTGTCAATCATTTTTTTTTTTTTTTTTTTT  
TTTTTGAGTCTA

R\_oct\_1\_SE\_3

CAAATGCTTTAAAAAATCAGGTCTTTAAGAGCAGCCAGAGGGTTTTTTTTTTTTTTTTTTT  
TTTTTTGAGTCTA

R\_oct\_1\_SE\_4

AAACGAAAGAGGGCGAAACAAAGTACTGACTATATTCGAGCTTTTTTTTTTTTTTTTTTTT  
TTTTTTGAGTCTA  
R\_oct\_1\_SE\_5  
GGTAGCTATTTAGAGAATCGATGAAAACATTAATGTGTAGTTTTTTTTTTTTTTTTTTT  
TTTTCTACCTT  
R\_oct\_1\_SE\_6  
ATAAATCATAATAATCGGTTGTACTGTGCTGGCATGCCTGTTTTTTTTTTTTTTTTTTT  
TTTTAGTTCTC  
R\_oct\_1\_SE\_7  
ACTGTTGGGAAGCAGCTGGCGAAAGGATAGGTCAAGATCGCATTTTTTTTTTTTTTTTTTT  
TTTTTACTCCTAA  
R\_oct\_1\_SE\_8  
AGCTTTCATCAACGGATTGACCGTAAAATCGTATAATTTTTTTTTTTTTTTTTTTTTTTT  
TTTTCAAGCA  
R\_oct\_1\_SE\_9  
TTTGC GGATGGCCAACTAAAGTACGGGCTTGCAGCTACAGAGTTTTTTTTTTTTTTTTTTT  
TTTTTCTACCTT  
R\_oct\_1\_SE\_10  
CTAAACAGCTTATATATTCGGTCGCTTGATGGGGAACAAGATTTTTTTTTTTTTTTTTTTT  
TTTTAGTTCTC  
R\_oct\_1\_SE\_11  
GGCCCTGAGAGAAGCAGGCGAAAATCATTGCGTAGAGGCGGTTTTTTTTTTTTTTTTTTT  
TTTTTACTCCTAA  
R\_oct\_1\_SE\_12  
GCTCACAATTCCGTGAGCTAACTCACTGGAAGTAATGGTCAATTTTTTTTTTTTTTTTTTTT  
TTTTTTCAAGCA  
R\_oct\_1\_SE\_13  
TG TAGCATTCCAACGTTAGTAAATGAAGTGCCGCGCCACCCTTTTTTTTTTTTTTTTTTTT  
TTTTTCTACCTT  
R\_oct\_1\_SE\_14  
GAAACATGAAAGCTCAGTACCAGGCGAAAATGCTGAACAAATTTTTTTTTTTTTTTTTTTT  
TTTTTTAGTTCTC  
R\_oct\_1\_SE\_15  
AGAGCCTAATTTGATTTTTTGT TAAATCCTGAAATAAAGAATTTTTTTTTTTTTTTTTTTT  
TTTACTCCTAA  
R\_oct\_1\_SE\_16  
TTTGC GGAACAATGGCAATTCATCAATCTGTATAATAATTTTTTTTTTTTTTTTTTTTTTTT  
TTTTCAAGCA  
R\_oct\_1\_SE\_17  
GACAGGAGGTTGAAACAAATAAATCCGCCCCCTCCGCCACCCTTTTTTTTTTTTTTTTTTTT  
TTTTTTCTACCTT  
R\_oct\_1\_SE\_18  
CAGAATCAAGTTTCGGCATTTCGGTTAAATATATCACCAGTTTTTTTTTTTTTTTTTTTTTT  
TTTTAGTTCTC

R\_oct\_1\_SE\_19

TCATATGGTTTACGATTGAGGGAGGGAAACGCAATACATACATTTTTTTTTTTTTTTTTTTT  
TTTACTCCTAA

R\_oct\_1\_SE\_20

AATAGCAATAGCACCAGAAGGAAACCTAAAGCCACTGGTAATTTTTTTTTTTTTTTTTTTT  
TTTTTTCAAGCA

R\_oct\_1\_SE\_21

CAACGCTCAACAGCAGAGGCATTTTCAATCCAATGATAAAATTTTTTTTTTTTTTTTTTTT  
TTTTTAACGGAT

R\_oct\_1\_SE\_22

ATCAAAATCATATATGTAAATGCTGAACAAACACTTGCTTCTTTTTTTTTTTTTTTTTTTT  
TTTTAACGGAT

R\_oct\_1\_SE\_23

TGATTGCTTTGAGCAAAGAAGATGAAATAGCAGAGGTTTTGTTTTTTTTTTTTTTTTTTT  
TTTTTAACGGAT

R\_oct\_1\_SE\_24

AACGGGTATTAAGGAATCATTACCGCCAGTAATTCAACAATTTTTTTTTTTTTTTTTTTT  
TTTTAACGGAT

## **R\_oct\_2**

R\_oct\_2\_SE\_1

AAAGATTCATCAGGAATTACGAGGCATGCTCATCCTTATGCGTTTTTTTTTTTTTTTTTTT  
TTTGTCATTGA

R\_oct\_2\_SE\_2

CTTCATCAAGAGAAATCAACGTAACAGAGATTTGTCAATCATTTTTTTTTTTTTTTTTTTT  
TTTTGTCATTGA

R\_oct\_2\_SE\_3

CAAATGCTTTAAAAAATCAGGTCTTTAAGAGCAGCCAGAGGGTTTTTTTTTTTTTTTTTTT  
TTTTTGTCATTGA

R\_oct\_2\_SE\_4

AAACGAAAGAGGGCGAAACAAAGTACTGACTATATTCGAGCTTTTTTTTTTTTTTTTTTTT  
TTTTTGTCATTGA

R\_oct\_2\_SE\_5

GGTAGCTATTTAGAGAATCGATGAAAACATTAAATGTGTAGTTTTTTTTTTTTTTTTTTT  
TTTAAGGTAGA

R\_oct\_2\_SE\_6

ATAAATCATACATAAATCGGTTGTACTGTGCTGGCATGCCTGTTTTTTTTTTTTTTTTTTT  
TTTTGCTTGAA

R\_oct\_2\_SE\_7

ACTGTTGGGAAGCAGCTGGCGAAAGGATAGGTCAAGATCGCATTTTTTTTTTTTTTTTTTTT  
TTTTTTTAGGAGT

R\_oct\_2\_SE\_8

AGCTTTCATCAACGGATTGACCGTAAAATCGTATAATTTTTTTTTTTTTTTTTTTTTTTT



TGATTGCTTTGAGCAAAGAAGATGAAATAGCAGAGGTTTTGTTTTTTTTTTTTTTTTTTTT  
TTTTCTCACTAT  
R\_oct\_2\_SE\_24  
AACGGGTATTAAGGAATCATTACCGCCAGTAATTCAACAATATTTTTTTTTTTTTTTTTTT  
TTTTCTCACTAT

**R\_oct\_3**

R\_oct\_3\_SE\_1  
AAAGATTCATCAGGAATTACGAGGCATGCTCATCCTTATGCGTTTTTTTTTTTTTTTTTTT  
TTTTGAGTCTA

R\_oct\_3\_SE\_2  
CTTCATCAAGAGAAATCAACGTAACAGAGATTTGTCAATCATTTTTTTTTTTTTTTTTTT  
TTTTGAGTCTA

R\_oct\_3\_SE\_3  
CAAATGCTTTAAAAAATCAGGTCTTTAAGAGCAGCCAGAGGGTTTTTTTTTTTTTTTTTT  
TTTTTTGAGTCTA

R\_oct\_3\_SE\_4  
AAACGAAAGAGGGCGAAACAAAGTACTGACTATATTCGAGCTTTTTTTTTTTTTTTTTTT  
TTTTTTGAGTCTA

R\_oct\_3\_SE\_5  
GGTAGCTATTTAGAGAATCGATGAAAACATTAATGTGTAGTTTTTTTTTTTTTTTTTTTT  
TTTTTCAAGCA

R\_oct\_3\_SE\_6  
ATAAATCATAATAATCGGTTGTACTGTGCTGGCATGCCTGTTTTTTTTTTTTTTTTTTTT  
TTTTTCAAGCA

R\_oct\_3\_SE\_7  
ACTGTTGGGAAGCAGCTGGCGAAAGGATAGGTCAAGATCGCATTTTTTTTTTTTTTTTTTT  
TTTTTTTCAAGCA

R\_oct\_3\_SE\_8  
AGCTTTTCATCAACGGATTGACCGTAAAATCGTATAATATTTTTTTTTTTTTTTTTTTTTT  
TTTTCAAGCA

R\_oct\_3\_SE\_9  
TTTGC GGATGGCCA ACTAAAGTACGGGCTG CAGCTACAGAGTTTTTTTTTTTTTTTTTTTT  
TTTTTTCAAGCA

R\_oct\_3\_SE\_10  
CTTAAACAGCTTATATATTCGGTCGCTTGATGGGGAACAAGATTTTTTTTTTTTTTTTTTT  
TTTTTCAAGCA

R\_oct\_3\_SE\_11  
GGCCCTGAGAGAAGCAGGCGAAAATCATTGCGTAGAGGCGGTTTTTTTTTTTTTTTTTTTT  
TTTTTTTCAAGCA

R\_oct\_3\_SE\_12  
GCTCACAATTCGGTGAGCTAACTCACTGGAAGTAATGGTCAATTTTTTTTTTTTTTTTTTT  
TTTTTTCAAGCA

R\_oct\_3\_SE\_13

TGTAGCATTCCAACGTTAGTAAATGAAGTGCCGCGCCACCCTTTTTTTTTTTTTTTTTTTT  
TTTTTCAAGCA

R\_oct\_3\_SE\_14

GAAACATGAAAGCTCAGTACCAGGCGAAAAATGCTGAACAAATTTTTTTTTTTTTTTTTT  
TTTTTCAAGCA

R\_oct\_3\_SE\_15

AGAGCCTAATTTGATTTTTTGTAAATCCTGAAATAAAGAATTTTTTTTTTTTTTTTTTTT  
TTTTTCAAGCA

R\_oct\_3\_SE\_16

TTTGCGGAACAATGGCAATTCATCAATCTGTATAATAATTTTTTTTTTTTTTTTTTTTTT  
TTTTCAAGCA

R\_oct\_3\_SE\_17

GACAGGAGGTTGAAACAAATAAATCCGCCCCCTCCGCCACCCTTTTTTTTTTTTTTTTTT  
TTTTTCAAGCA

R\_oct\_3\_SE\_18

CAGAATCAAGTTTCGGCATTTCGGTTAAATATATCACCAGTTTTTTTTTTTTTTTTTTTTT  
TTTTTCAAGCA

R\_oct\_3\_SE\_19

TCATATGGTTTACGATTGAGGGAGGGAAACGCAATACATACATTTTTTTTTTTTTTTTTTTT  
TTTTTCAAGCA

R\_oct\_3\_SE\_20

AATAGCAATAGCACCAGAAGGAAACCTAAAGCCACTGGTAATTTTTTTTTTTTTTTTTTTTTT  
TTTTTCAAGCA

R\_oct\_3\_SE\_21

CAACGCTCAACAGCAGAGGCATTTTCAATCCAATGATAAATATTTTTTTTTTTTTTTTTTTT  
TTTTAACGGAT

R\_oct\_3\_SE\_22

ATCAAATCATATATGTAAATGCTGAACAAACACTTGCTTCTTTTTTTTTTTTTTTTTTTTTT  
TTTTAACGGAT

R\_oct\_3\_SE\_23

TGATTGCTTTGAGCAAAGAAGATGAAATAGCAGAGGTTTTGTTTTTTTTTTTTTTTTTTTTT  
TTTTAACGGAT

R\_oct\_3\_SE\_24

AACGGGTATTAAGGAATCATTACCGCCAGTAATTCAACAATATTTTTTTTTTTTTTTTTTTTTT  
TTTTAACGGAT

## **R\_oct\_4**

R\_oct\_4\_SE\_1

AAAGATTCATCAGGAATTACGAGGCATGCTCATCCTTATGCGTTTTTTTTTTTTTTTTTTTTT  
TTTTGAGTCTA

R\_oct\_4\_SE\_2

CTTCATCAAGAGAAATCAACGTAACAGAGATTTGTCAATCATTTTTTTTTTTTTTTTTTTTTT

TTTTTGAGTCTA  
R\_oct\_4\_SE\_3  
CAAATGCTTTAAAAAATCAGGTCTTTAAGAGCAGCCAGAGGGTTTTTTTTTTTTTTTTTT  
TTTTTGAGTCTA  
R\_oct\_4\_SE\_4  
AAACGAAAGAGGGCGAAACAAAGTACTGACTATAATTCGAGCTTTTTTTTTTTTTTTTTTT  
TTTTTGAGTCTA  
R\_oct\_4\_SE\_5  
GGTAGCTATTTTAGAGAATCGATGAAAACATTAATGTGTAGTTTTTTTTTTTTTTTTTT  
TTTTCTACCTT  
R\_oct\_4\_SE\_6  
ATAAATCATAATAAATCGGTTGTACTGTGCTGGCATGCCTGTTTTTTTTTTTTTTTTTT  
TTTTCTACCTT  
R\_oct\_4\_SE\_7  
ACTGTTGGGAAGCAGCTGGCGAAAGGATAGGTCAAGATCGCATTTTTTTTTTTTTTTTTTT  
TTTTTTTCAAGCA  
R\_oct\_4\_SE\_8  
AGCTTTCATCAACGGATTGACCGTAAAATCGTATAATATTTTTTTTTTTTTTTTTTTTTTT  
TTTTCAAGCA  
R\_oct\_4\_SE\_9  
TTTGC GGATGGCCAACTAAAGTACGGGCTTGCAGCTACAGAGTTTTTTTTTTTTTTTTTT  
TTTTCTACCTT  
R\_oct\_4\_SE\_10  
CTTAAACAGCTTATATATTCGGTCGCTTGATGGGGAACAAGATTTTTTTTTTTTTTTTTTT  
TTTTCTACCTT  
R\_oct\_4\_SE\_11  
GGCCCTGAGAGAAGCAGGCGAAAATCATTGCGTAGAGGCGGTTTTTTTTTTTTTTTTTTTT  
TTTTTTTCAAGCA  
R\_oct\_4\_SE\_12  
GCTCACAATTCCGTGAGCTAACTCACTGGAAGTAATGGTCAATTTTTTTTTTTTTTTTTTT  
TTTTTTCAAGCA  
R\_oct\_4\_SE\_13  
TGTAGCATTC AACGTTAGTAAATGAAGTGCCGCGCCACCCTTTTTTTTTTTTTTTTTTT  
TTTTCTACCTT  
R\_oct\_4\_SE\_14  
GAAACATGAAAGCTCAGTACCAGGCGAAAAATGCTGAACAAATTTTTTTTTTTTTTTTTTT  
TTTTTTCTACCTT  
R\_oct\_4\_SE\_15  
AGAGCCTAATTTGATTTTTTGTTAAATCCTGAAATAAAGAATTTTTTTTTTTTTTTTTTT  
TTTTTCAAGCA  
R\_oct\_4\_SE\_16  
TTTGC GGAACAATGGCAATTCATCAATCTGTATAATAATTTTTTTTTTTTTTTTTTTTTTT  
TTTTCAAGCA  
R\_oct\_4\_SE\_17



GACAGGAGGTTGAAACAAATAAATCCGCCCCCTCCGCCACCCTTTTTTTTTTTTTTTTTT  
TTTTTCTACCTT

R\_oct\_4\_SE\_18

CAGAATCAAGTTTCGGCATTTCGGTTAAATATATCACCAGTTTTTTTTTTTTTTTTTTT  
TTTTCTACCTT

R\_oct\_4\_SE\_19

TCATATGGTTTACGATTGAGGGAGGGAAACGCAATACATACATTTTTTTTTTTTTTTTTT  
TTTTTCAAGCA

R\_oct\_4\_SE\_20

AATAGCAATAGCACCAGAAGGAAACCTAAAGCCACTGGTAATTTTTTTTTTTTTTTTTT  
TTTTTCAAGCA

R\_oct\_4\_SE\_21

CAACGCTCAACAGCAGAGGCATTTCAATCCAATGATAAATATTTTTTTTTTTTTTTTTT  
TTTTTAACGGAT

R\_oct\_4\_SE\_22

ATCAAAATCATATATGTAAATGCTGAACAAACACTTGCTTCTTTTTTTTTTTTTTTTTT  
TTTTAACGGAT

R\_oct\_4\_SE\_23

TGATTGCTTTGAGCAAAAGAAGATGAAATAGCAGAGGTTTGTTTTTTTTTTTTTTTTTT  
TTTTTAACGGAT

R\_oct\_4\_SE\_24

AACGGGTATTAAGGAATCATTACCGCCAGTAATTCAACAATATTTTTTTTTTTTTTTTTT  
TTTTAACGGAT

## **R\_oct\_5**

R\_oct\_5\_SE\_1

AAAGATTCATCAGGAATTACGAGGCATGCTCATCCTTATGCGTTTTTTTTTTTTTTTTT  
TTTAGTTAGTG

R\_oct\_5\_SE\_2

CTTCATCAAGAGAAATCAACGTAACAGAGATTTGTCAATCATTTTTTTTTTTTTTTTTT  
TTTTTCTACCTT

R\_oct\_5\_SE\_3

CAAATGCTTTAAAAAATCAGGTCTTTAAGAGCAGCCAGAGGGTTTTTTTTTTTTTTTTT  
TTTTTATGACTG

R\_oct\_5\_SE\_4

AAACGAAAGAGGGCGAAACAAAGTACTGACTATATTCGAGCTTTTTTTTTTTTTTTTTT  
TTTTTGTTGTCT

R\_oct\_5\_SE\_5

GGTAGCTATTTAGAGAATCGATGAAAACATTAATGTGTAGTTTTTTTTTTTTTTTTTT  
TTTTTCAAGCA

R\_oct\_5\_SE\_6

ATAAATCATACATAAATCGGTTGTAAGTGTGCTGGCATGCCTGTTTTTTTTTTTTTTTTT  
TTTTTCAAGCA

R\_oct\_5\_SE\_7

ACTGTTGGGAAGCAGCTGGCGAAAGGATAGGTCAAGATCGCATTTTTTTTTTTTTTTTTTT  
TTTTTTTCAAGCA

R\_oct\_5\_SE\_8

AGCTTTCATCAACGGATTGACCGTAAAATCGTATAATTTTTTTTTTTTTTTTTTTTTT  
TTTTCAAGCA

R\_oct\_5\_SE\_9

TTTGCGGATGGCCAACTAAAGTACGGGCTTGCAGCTACAGAGTTTTTTTTTTTTTTTTTT  
TTTTTTCAAGCA

R\_oct\_5\_SE\_10

CTTAAACAGCTTATATATTCGGTTCGCTTGATGGGGAACAAGATTTTTTTTTTTTTTTTTT  
TTTTTCAAGCA

R\_oct\_5\_SE\_11

GGCCCTGAGAGAAGCAGGCGAAAATCATTGCGTAGAGGCGGTTTTTTTTTTTTTTTTTT  
TTTTTTTCAAGCA

R\_oct\_5\_SE\_12

GCTCACAATTCGTGAGCTAACTCACTGGAAGTAATGGTCAATTTTTTTTTTTTTTTTTTT  
TTTTTTCAAGCA

R\_oct\_5\_SE\_13

TGTAGCATTCCAACGTTAGTAAATGAAGTGCCGCGCCACCCTTTTTTTTTTTTTTTTTTT  
TTTTTTCAAGCA

R\_oct\_5\_SE\_14

GAAACATGAAAGCTCAGTACCAGGCGAAAATGCTGAACAAATTTTTTTTTTTTTTTTTTT  
TTTTTTTCAAGCA

R\_oct\_5\_SE\_15

AGAGCCTAATTTGATTTTTTGTTTAAATCCTGAAATAAAGAATTTTTTTTTTTTTTTTTTT  
TTTTTCAAGCA

R\_oct\_5\_SE\_16

TTTGCGGAACAATGGCAATTCATCAATCTGTATAATAATTTTTTTTTTTTTTTTTTTTTT  
TTTTCAAGCA

R\_oct\_5\_SE\_17

GACAGGAGGTTGAAACAAATAAATCCGCCCCCTCCGCCACCCTTTTTTTTTTTTTTTTTTT  
TTTTTTTCAAGCA

R\_oct\_5\_SE\_18

CAGAATCAAGTTTCGGCATTTCGGTTAAATATATCACCAGTTTTTTTTTTTTTTTTTTTTT  
TTTTTCAAGCA

R\_oct\_5\_SE\_19

TCATATGGTTTACGATTGAGGGAGGGAAACGCAATACATACATTTTTTTTTTTTTTTTTTT  
TTTTTCAAGCA

R\_oct\_5\_SE\_20

AATAGCAATAGCACCAGAAGGAAACCTAAAGCCACTGGTAATTTTTTTTTTTTTTTTTTTT  
TTTTTTCAAGCA

R\_oct\_5\_SE\_21

CAACGCTCAACAGCAGAGGCATTTTCAATCCAATGATAAATATTTTTTTTTTTTTTTTTTT

TTTTACATCCAT

R\_oct\_5\_SE\_22

ATCAAAATCATATATGTAAATGCTGAACAAACACTTGCTTCTTTTTTTTTTTTTTTTTTTTT

TTTTGAGTCTA

R\_oct\_5\_SE\_23

TGATTGCTTTGAGCAAAGAAGATGAAATAGCAGAGGTTTTGTTTTTTTTTTTTTTTTTTTTT

TTTTCAACTGTA

R\_oct\_5\_SE\_24

AACGGGTATTAAGGAATCATTACCGCCAGTAATTCAACAATATTTTTTTTTTTTTTTTTTTTT

TTTTCAATGAC

## **R\_oct\_6**

R\_oct\_6\_SE\_1

AAAGATTCATCAGGAATTACGAGGCATGCTCATCCTTATGCGTTTTTTTTTTTTTTTTTTTT

TTTTAGTTCTC

R\_oct\_6\_SE\_2

CTTCATCAAGAGAAATCAACGTAACAGAGATTTGTCAATCATTTTTTTTTTTTTTTTTTTTT

TTTTACTCCTAA

R\_oct\_6\_SE\_3

CAAATGCTTTAAAAAATCAGGTCTTTAAGAGCAGCCAGAGGGTTTTTTTTTTTTTTTTTTTT

TTTTTCTCACTAT

R\_oct\_6\_SE\_4

AAACGAAAGAGGGCGAAACAAAGTACTGACTATATTCGAGCTTTTTTTTTTTTTTTTTTTTT

TTTTTTAACGGAT

R\_oct\_6\_SE\_5

GGTAGCTATTTTAGAGAATCGATGAAAACATTAATGTGTAGTTTTTTTTTTTTTTTTTTTT

TTTACTCCTAA

R\_oct\_6\_SE\_6

ATAAATCATACATAAATCGGTTGTACTGTGCTGGCATGCCTGTTTTTTTTTTTTTTTTTTTT

TTTTAACGGAT

R\_oct\_6\_SE\_7

ACTGTTGGGAAGCAGCTGGCGAAAGGATAGGTCAAGATCGCATTTTTTTTTTTTTTTTTTTTT

TTTTTCTCACTAT

R\_oct\_6\_SE\_8

AGCTTTCATCAACGGATTGACCGTAAAATCGTATAATATTTTTTTTTTTTTTTTTTTTTTTTT

TTTAGTTCTC

R\_oct\_6\_SE\_9

TTTGCGGATGGCCAACATAAAGTACGGGCTTGCAGCTACAGAGTTTTTTTTTTTTTTTTTTTT

TTTTTCTACCTT

R\_oct\_6\_SE\_10

CTAAACAGCTTATATATTCGGTTCGCTTGATGGGGAACAAGATTTTTTTTTTTTTTTTTTTTT

TTTTCTACCTT

R\_oct\_6\_SE\_11

GGCCCTGAGAGAAGCAGGCGAAAATCATTGCGTAGAGGCGGTTTTTTTTTTTTTTTTTTTT  
TTTTTCTACCTT

R\_oct\_6\_SE\_12

GCTCACAATTCGTGAGCTAACTCACTGGAAGTAATGGTCAATTTTTTTTTTTTTTTTTTTT  
TTTTTCTACCTT

R\_oct\_6\_SE\_13

TGTAGCATTCCAACGTTAGTAAATGAAGTGCCGCGCCACCCTTTTTTTTTTTTTTTTTTTT  
TTTTTCTACTAT

R\_oct\_6\_SE\_14

GAAACATGAAAGCTCAGTACCAGGCGAAAAATGCTGAACAAATTTTTTTTTTTTTTTTTTTT  
TTTTTTAGTTCTC

R\_oct\_6\_SE\_15

AGAGCCTAATTTGATTTTTTGTTTAAATCCTGAAATAAAGAATTTTTTTTTTTTTTTTTTTT  
TTTACTCCTAA

R\_oct\_6\_SE\_16

TTTGCGGAACAATGGCAATTCATCAATCTGTATAATAATTTTTTTTTTTTTTTTTTTTTTTT  
TTTAACGGAT

R\_oct\_6\_SE\_17

GACAGGAGGTTGAAACAAATAAATCCGCCCCCTCCGCCACCCTTTTTTTTTTTTTTTTTTTT  
TTTTTTCAAGCA

R\_oct\_6\_SE\_18

CAGAATCAAGTTTCGGCATTTCGGTTAAATATATCACCAGTTTTTTTTTTTTTTTTTTTTTTT  
TTTTTCAAGCA

R\_oct\_6\_SE\_19

TCATATGGTTTACGATTGAGGGAGGGAAACGCAATACATACATTTTTTTTTTTTTTTTTTTTTT  
TTTTTCAAGCA

R\_oct\_6\_SE\_20

AATAGCAATAGCACCAGAAGGAAACCTAAAGCCACTGGTAATTTTTTTTTTTTTTTTTTTTTTTT  
TTTTTTCAAGCA

R\_oct\_6\_SE\_21

CAACGCTCAACAGCAGAGGCATTTTCAATCCAATGATAAATAATTTTTTTTTTTTTTTTTTTTTT  
TTTTACTCCTAA

R\_oct\_6\_SE\_22

ATCAAATCATATATGTAAATGCTGAACAAACACTTGCTTCTTTTTTTTTTTTTTTTTTTTTTTT  
TTTAACGGAT

R\_oct\_6\_SE\_23

TGATTGCTTTGAGCAAAGAAGATGAAATAGCAGAGGTTTTGTTTTTTTTTTTTTTTTTTTTTTT  
TTTTTCTACTAT

R\_oct\_6\_SE\_24

AACGGGTATTAAGGAATCATTACCGCCAGTAATTCAACAATAATTTTTTTTTTTTTTTTTTTTTTTT  
TTTTAGTTCTC

**E\_oct\_1**

E\_oct\_1\_SE\_1  
AAAGTACAACGGGTTACTTAGCCGGACTCAGCAATACGTAATTTTTTTTTTTTTTTTTTTT  
TTTTATCCGTTA

E\_oct\_1\_SE\_2  
ATAGTTGCGCCGTTTTGCGGGATCGTGTTAGCGAGGAATTGCTTTTTTTTTTTTTTTTTT  
TTTTATCCGTTA

E\_oct\_1\_SE\_3  
GTGAATTACCTTAACGGAACAACATTGGCGCAGGATATTCATTTTTTTTTTTTTTTTTTTT  
TTTTATCCGTTA

E\_oct\_1\_SE\_4  
TTTTCAGGGATAACCACAGACAGCCCTCAGGTAGATCATAACCTTTTTTTTTTTTTTTTTTT  
TTTTATCCGTTA

E\_oct\_1\_SE\_5  
ATTAAGCAATAAAATACTTTTGCGGGAGTTTCATATTTTCATTTTTTTTTTTTTTTTTTTT  
TTGTTGTTCT

E\_oct\_1\_SE\_6  
CGGATGGCTTAGTAAAGTACGGTGTCTTTCCGTCGGTGCGGTTTTTTTTTTTTTTTTTTTT  
TTTTTATGACTG

E\_oct\_1\_SE\_7  
TGGGATAGGTCAAGATCGCACTCCAGCGGTTGAAATAGGAACTTTTTTTTTTTTTTTTTTTT  
TTTTTCGTATCA

E\_oct\_1\_SE\_8  
AGGTCATTCCTTGTCATCATATGTGCCTTTAGCCGGAGACTTTTTTTTTTTTTTTTTTTTTT  
TTTAGTTAGTG

E\_oct\_1\_SE\_9  
TACTGCGGAATCTCAGGTCTTACCCTATTCTGGGGTTGATATTTTTTTTTTTTTTTTTTTTT  
TTTGTGTTCT

E\_oct\_1\_SE\_10  
TAATAAGTTTTAGCCTATTTTCGGAACCTTGATGGGGAACAAGATTTTTTTTTTTTTTTTTTT  
TTTTATGACTG

E\_oct\_1\_SE\_11  
TCACCAGTGAGAAGCAGGCGAAAATCTCGTAATTTAATTGCGTTTTTTTTTTTTTTTTTTTTT  
TTTTTCGTATCA

E\_oct\_1\_SE\_12  
CGACGTTGTAAACGGGTACCGAGCTCTATTATAGAGCTTCAATTTTTTTTTTTTTTTTTTTTT  
TTTAGTTAGTG

E\_oct\_1\_SE\_13  
ACCACCGGAACCTCAGAGCCGCCACCAAATCACTTTAGCGTTTTTTTTTTTTTTTTTTTTTT  
TTTTGTGTTCT

E\_oct\_1\_SE\_14  
AAGGTAAATATTTGGGAATTAGAGCTTTTTTAAGAAAACCTTTTTTTTTTTTTTTTTTTTTTT  
TTTTATGACTG

E\_oct\_1\_SE\_15  
TTAATTTCCCTTAGGTCTGAGAGACACCACACTAAACAGGATTTTTTTTTTTTTTTTTTTTTT

TTTTTCGTATCA

E\_oct\_1\_SE\_16

CGTGCGGAGAAAGTCACGCTGCGCGTCCACCACTCCTCATTATTTTTTTTTTTTTTTTTTTT  
TTTTAGTTAGTG

E\_oct\_1\_SE\_17

CCTTTTTAAGAAACTGGCATGATTAATATTATAACACCCTGTTTTTTTTTTTTTTTTTTTT  
TTTGTTGTTCT

E\_oct\_1\_SE\_18

TCTTACCAACGCGTTACAAAATAAACGGAATCAGAACCTCCCTTTTTTTTTTTTTTTTTTTT  
TTTTTATGACTG

E\_oct\_1\_SE\_19

AACCAATCAATAGTTTTTATTTTCATGCCAACGTAATCTGTTTTTTTTTTTTTTTTTTTTTT  
TTTCGTATCA

E\_oct\_1\_SE\_20

TAAGAATAAACAAATTCTTACCAGTACCTTATTGGAATAAGTTTTTTTTTTTTTTTTTTTTTT  
TTTAGTTAGTG

E\_oct\_1\_SE\_21

CAATAGATAATATAAATCCTTTGCCCCGGCGGTCTCAATCAATTTTTTTTTTTTTTTTTTTTT  
TTTTAGACTCA

E\_oct\_1\_SE\_22

TTTAATGCGCGAAAGATAAAAACAGAGCCAGCCAACCAGTAATTTTTTTTTTTTTTTTTTTTT  
TTTTTAGACTCA

E\_oct\_1\_SE\_23

TAACCGTTGTAGTCCAGAACAATATTCGCCTGAACAAAATTTTTTTTTTTTTTTTTTTTTTT  
TTTTAGACTCA

E\_oct\_1\_SE\_24

GAAATTGCGTAGGGAGAAACAATAACGTTATTAGCAATTCATTTTTTTTTTTTTTTTTTTTTTT  
TTTTTAGACTCA

## **E\_oct\_2**

E\_oct\_2\_SE\_1

AAAGTACAACGGGTTACTTAGCCGGACTCAGCAATACGTAATTTTTTTTTTTTTTTTTTTTTTT  
TTTTTACAGTTG

E\_oct\_2\_SE\_2

ATAGTTGCGCCGTTTTGCGGGATCGTGTTAGCGAGGAATTGCTTTTTTTTTTTTTTTTTTTTT  
TTTTTACAGTTG

E\_oct\_2\_SE\_3

GTGAATTACCTTAACGGAACAACATTGGCGCAGGATATTCATTTTTTTTTTTTTTTTTTTTTTT  
TTTTTACAGTTG

E\_oct\_2\_SE\_4

TTTTCAGGGATAACCACAGACAGCCCTCAGGTAGATCATAACCTTTTTTTTTTTTTTTTTTTTT  
TTTTTACAGTTG

E\_oct\_2\_SE\_5

ATTAAGCAATAAAATACTTTTGCGGGAGTTTCATATTTTCATTTTTTTTTTTTTTTTTTTTTTTT  
TTGTTGTTCT

E\_oct\_2\_SE\_6

CGGATGGCTTAGTAAAGTACGGTGCCTTCCGTCGGTGCGGTTTTTTTTTTTTTTTTTTTTTTT  
TTTTATGACTG

E\_oct\_2\_SE\_7

TGGGATAGGTCAAGATCGCACTCCAGCGGTTGAAATAGGAACTTTTTTTTTTTTTTTTTTTTTT  
TTTTTCGTATCA

E\_oct\_2\_SE\_8

AGGTCATTGCCTTGTCAATCATATGTGCCTTAGCCGGAGACTTTTTTTTTTTTTTTTTTTTTT  
TTTAGTTAGTG

E\_oct\_2\_SE\_9

TACTGCGGAATCTCAGGTCTTACCCTATTCTGGGGTTGATATTTTTTTTTTTTTTTTTTTTTT  
TTTGTGTTCT

E\_oct\_2\_SE\_10

TAATAAGTTTTAGCCTATTTTCGGAACCTTGATGGGGAACAAGATTTTTTTTTTTTTTTTTTTTTT  
TTTTATGACTG

E\_oct\_2\_SE\_11

TCACCAGTGAGAAGCAGGCGAAAATCTCGTAATTTAATTGCGTTTTTTTTTTTTTTTTTTTTTT  
TTTTTCGTATCA

E\_oct\_2\_SE\_12

CGACGTTGTAAACGGGTACCGAGCTCTATTATAGAGCTTCAATTTTTTTTTTTTTTTTTTTTTT  
TTTAGTTAGTG

E\_oct\_2\_SE\_13

ACCACCGGAACCTCAGAGCCGCCACCAAATCACTTAGCGTTTTTTTTTTTTTTTTTTTTTTTT  
TTTTTGTGTTCT

E\_oct\_2\_SE\_14

AAGGTAAATATTTTGGGAATTAGAGCTTTTTAAGAAAACCTTTTTTTTTTTTTTTTTTTTTTTT  
TTTTATGACTG

E\_oct\_2\_SE\_15

TTAATTTCCCTTAGGTCTGAGAGACACCACACTAAACAGGATTTTTTTTTTTTTTTTTTTTTT  
TTTTTCGTATCA

E\_oct\_2\_SE\_16

CGTGGCGAGAAAGTCACGCTGCGCGTCCACCACTCCTCATTATTTTTTTTTTTTTTTTTTTTTT  
TTTAGTTAGTG

E\_oct\_2\_SE\_17

CCTTTTTAAGAAACTGGCATGATTAAATATTATAACACCCTGTTTTTTTTTTTTTTTTTTTTTT  
TTTGTGTTCT

E\_oct\_2\_SE\_18

TCTTACCAACGCGTTACAAAATAAACGGAATCAGAACCTCCCTTTTTTTTTTTTTTTTTTTTTTT  
TTTTATGACTG

E\_oct\_2\_SE\_19

AACCAATCAATAGTTTTTATTTTCATGCCAACGTAATCTGTTTTTTTTTTTTTTTTTTTTTTTT  
TTTCGTATCA

E\_oct\_2\_SE\_20

TAAGAATAAACAAATTCTTACCAGTACCTTATTGGAATAAGTTTTTTTTTTTTTTTTTTTTTTT  
TTTAGTTAGTG

E\_oct\_2\_SE\_21

CAATAGATAATATAAATCCTTTGCCCGGCGGTCTCAATCAATTTTTTTTTTTTTTTTTTTTTT  
TTTTAGACTCA

E\_oct\_2\_SE\_22

TTTAATGCGCGAAAGATAAAAACAGAGCCAGCCAACCAGTAATTTTTTTTTTTTTTTTTTTTTT  
TTTTTAGACTCA

E\_oct\_2\_SE\_23

TAACCGTTGTAGTCCAGAACAATATTCGCCTGAACAAAATTTTTTTTTTTTTTTTTTTTTT  
TTTTAGACTCA

E\_oct\_2\_SE\_24

GAAATTGCGTAGGGAGAAACAATAACGTTATTAGCAATTCATTTTTTTTTTTTTTTTTTTTTT  
TTTTTAGACTCA

### **E\_oct\_3**

E\_oct\_3\_SE\_1

AAAGTACAACGGGTTACTTAGCCGGACTCAGCAATACGTAATTTTTTTTTTTTTTTTTTTTTT  
TTTTACACACAT

E\_oct\_3\_SE\_2

ATAGTTGCGCCGTTTTGCGGGATCGTGTTAGCGAGGAATTGCTTTTTTTTTTTTTTTTTTTTTT  
TTTTACACACAT

E\_oct\_3\_SE\_3

GTGAATTACCTTAACGGAACAACATTGGCGCAGGATATTCATTTTTTTTTTTTTTTTTTTTTT  
TTTACACACAT

E\_oct\_3\_SE\_4

TTTTCAGGGATAACCACAGACAGCCCTCAGGTAGATCATAACCTTTTTTTTTTTTTTTTTTTTTT  
TTTTACACACAT

E\_oct\_3\_SE\_5

ATTAAGCAATAAAATACTTTTGCGGGAGTTTCATATTTTCATTTTTTTTTTTTTTTTTTTTTT  
TTAGAACAAC

E\_oct\_3\_SE\_6

CGGATGGCTTAGTAAAGTACGGTGTCTTCCGTCGGTGCGGTTTTTTTTTTTTTTTTTTTTT  
TTTTCACTAACT

E\_oct\_3\_SE\_7

TGGGATAGGTCAAGATCGCACTCCAGCGGTTGAAATAGGAACTTTTTTTTTTTTTTTTTTTTTT  
TTTTTGATACGA

E\_oct\_3\_SE\_8

AGGTCATTGCCTTGTCATCATATGTGCCTTAGCCGGAGACTTTTTTTTTTTTTTTTTTTTTT  
TTTCAGTCATA

E\_oct\_3\_SE\_9

TACTGCGGAATCTCAGGTCTTACCCTATTCTGGGGTTGATATTTTTTTTTTTTTTTTTTTTTT





GAAATTGCGTAGGGAGAAACAATAACGTTATTAGCAATTCATTTTTTTTTTTTTTTTTTTT  
TTTTTCAATGAC

**E\_oct\_4**

E\_oct\_4\_SE\_1

AAAGTACAACGGGTTACTTAGCCGGACTCAGCAATACGTAATTTTTTTTTTTTTTTTTTTT  
TTTTATCCGTTA

E\_oct\_4\_SE\_2

ATAGTTGCGCCGTTTTGCGGGATCGTGTTAGCGAGGAATTGCTTTTTTTTTTTTTTTTTTTT  
TTTTATCCGTTA

E\_oct\_4\_SE\_3

TTTTCAGGGATACCACAGACAGCCCTCAGGTAGATCATAACCTTTTTTTTTTTTTTTTTTTT  
TTTTATCCGTTA

E\_oct\_4\_SE\_4

GTGAATTACCTTAACGGAACAACATTGGCGCAGGATATTCATTTTTTTTTTTTTTTTTTTT  
TTTATCCGTTA

E\_oct\_4\_SE\_5

ATTAAGCAATAAAATACTTTTGCGGGAGTTTCATATTTTCATTTTTTTTTTTTTTTTTTTT  
TTTCGTATCA

E\_oct\_4\_SE\_6

CGGATGGCTTAGTAAAGTACGGTGTCTTTCCGTCCGGTGC GGTTTTTTTTTTTTTTTTTTT  
TTTTTCGTATCA

E\_oct\_4\_SE\_7

TGGGATAGGTCAAGATCGCACTCCAGCGGTTGAAATAGGAACTTTTTTTTTTTTTTTTTTTT  
TTTTTCGTATCA

E\_oct\_4\_SE\_8

AGGTCATTCCTTGTCATCATATGTGCCTTTAGCCGGAGACTTTTTTTTTTTTTTTTTTTT  
TTTTTCGTATCA

E\_oct\_4\_SE\_9

TACTGCGGAATCTCAGGTCTTACCCTATCTGGGGTTGATATTTTTTTTTTTTTTTTTTT  
TTTTTCGTATCA

E\_oct\_4\_SE\_10

TAATAAGTTTTAGCCTATTTTCGGAACCTTGATGGGGAACAAGATTTTTTTTTTTTTTTTTTTT  
TTTTTCGTATCA

E\_oct\_4\_SE\_11

TCACCAGTGAGAAGCAGGCGAAAATCTCGTAATTTAATTGCGTTTTTTTTTTTTTTTTTTT  
TTTTTCGTATCA

E\_oct\_4\_SE\_12

CGACGTTGTAAACGGGTACCGAGCTCTATTATAGAGCTTCAATTTTTTTTTTTTTTTTTTTT  
TTTTTCGTATCA

E\_oct\_4\_SE\_13

ACCACCGGAACCTCAGAGCCGCCACCAAATCACTTTAGCGTTTTTTTTTTTTTTTTTTT  
TTTTTTTCGTATCA

E\_oct\_4\_SE\_14

AAGGTAAATATTTTGGGAATTAGAGCTTTTTAAGAAAACCTTTTTTTTTTTTTTTTTTTTT  
TTTTTCGTATCA

E\_oct\_4\_SE\_15

TTAATTTTCCCTTAGGTCTGAGAGACACCACACTAACAGGATTTTTTTTTTTTTTTTTTT  
TTTTTCGTATCA

E\_oct\_4\_SE\_16

CGTGGCGAGAAAGTCACGCTGCGCGTCCACCCTCCTCATTATTTTTTTTTTTTTTTTTTT  
TTTTTCGTATCA

E\_oct\_4\_SE\_17

CCTTTTTAAGAACTGGCATGATTAAATATTATAACACCCTGTTTTTTTTTTTTTTTTTTT  
TTTTTCGTATCA

E\_oct\_4\_SE\_18

TCTTACCAACGCGTTACAAAATAAACGGAATCAGAACCTCCCTTTTTTTTTTTTTTTTTTT  
TTTTTCGTATCA

E\_oct\_4\_SE\_19

AACCAATCAATAGTTTTTATTTTCATGCCAACGTAATTCTGTTTTTTTTTTTTTTTTTTTT  
TTTTTCGTATCA

E\_oct\_4\_SE\_20

TAAGAATAAACAAATTCTTACCAGTACCTTATTGGAATAAGTTTTTTTTTTTTTTTTTTTT  
TTTTTCGTATCA

E\_oct\_4\_SE\_21

CAATAGATAATATAAATCCTTTGCCCGGCGGTCTCAATCAATTTTTTTTTTTTTTTTTTTTT  
TTTTAGACTCA

E\_oct\_4\_SE\_22

TTAATGCGCGAAAGATAAAAACAGAGCCAGCCAACCAGTAATTTTTTTTTTTTTTTTTTTTT  
TTTTTAGACTCA

E\_oct\_4\_SE\_23

TAACCGTTGTAGTCCAGAACAATATTCGCCTGAACAAAATTTTTTTTTTTTTTTTTTTTTTT  
TTTTAGACTCA

E\_oct\_4\_SE\_24

GAAATTGCGTAGGGAGAAACAATAACGTTATTAGCAATTCATTTTTTTTTTTTTTTTTTTTT  
TTTTTAGACTCA

## **E\_oct\_5**

E\_oct\_5\_SE\_1

AAAGTACAACGGGTTACTTAGCCGGACTCAGCAATACGTAATTTTTTTTTTTTTTTTTTTTT  
TTTTATCCGTTA

E\_oct\_5\_SE\_2

ATAGTTGCGCCGTTTTGCGGGATCGTGTTAGCGAGGAATTGCTTTTTTTTTTTTTTTTTTT  
TTTTATCCGTTA

E\_oct\_5\_SE\_3

TTTTCAGGGATAACCACAGACAGCCCTCAGGTAGATCATAACCTTTTTTTTTTTTTTTTTTT

TTTTATCCGTTA  
E\_oct\_5\_SE\_4  
GTGAATTACCTTAACGGAACAACATTGGCGCAGGATATTCATTTTTTTTTTTTTTTTTTTTTT  
TTTTATCCGTTA  
E\_oct\_5\_SE\_5  
ATTAAGCAATAAAAATACTTTTGCGGGAGTTTCATATTTTCATTTTTTTTTTTTTTTTTTTTTT  
TTTTATGACTG  
E\_oct\_5\_SE\_6  
CGGATGGCTTAGTAAAGTACGGTGTCTTTCCGTCGGTGCGGTTTTTTTTTTTTTTTTTTTTT  
TTTTATGACTG  
E\_oct\_5\_SE\_7  
TGGGATAGGTCAAGATCGCACTCCAGCGGTTGAAATAGGAACTTTTTTTTTTTTTTTTTTTTTT  
TTTTTCGTATCA  
E\_oct\_5\_SE\_8  
AGGTCATTGCCTTGTCAATCATATGTGCCTTAGCCGGAGACTTTTTTTTTTTTTTTTTTTTTT  
TTTTTCGTATCA  
E\_oct\_5\_SE\_9  
TACTGCGGAATCTCAGGTCTTACCCTATTCTGGGGTTGATATTTTTTTTTTTTTTTTTTTTTT  
TTTTATGACTG  
E\_oct\_5\_SE\_10  
TAATAAGTTTTAGCCTATTTTCGGAACCTTGATGGGGAACAAGATTTTTTTTTTTTTTTTTTTTTT  
TTTTATGACTG  
E\_oct\_5\_SE\_11  
TCACCAGTGAGAAGCAGGCGAAAATCTCGTAATTTAATTGCGTTTTTTTTTTTTTTTTTTTTT  
TTTTTCGTATCA  
E\_oct\_5\_SE\_12  
CGACGTTGTAAACGGGTACCGAGCTCTATTATAGAGCTTCAATTTTTTTTTTTTTTTTTTTTTT  
TTTTTCGTATCA  
E\_oct\_5\_SE\_13  
ACCACCGGAACCTCAGAGCCGCCACCAAAAATCACTTAGCGTTTTTTTTTTTTTTTTTTTTT  
TTTTTTATGACTG  
E\_oct\_5\_SE\_14  
AAGGTAAATATTTGGGAATTAGAGCTTTTTAAGAAAACTTTTTTTTTTTTTTTTTTTTTTTTT  
TTTTATGACTG  
E\_oct\_5\_SE\_15  
TTAATTTCCCTTAGGTCTGAGAGACACCACACTAAACAGGATTTTTTTTTTTTTTTTTTTTTT  
TTTTTCGTATCA  
E\_oct\_5\_SE\_16  
CGTGGCGAGAAAGTCACGCTGCGCGTCCACCACTCCTCATTATTTTTTTTTTTTTTTTTTTTTT  
TTTTTCGTATCA  
E\_oct\_5\_SE\_17  
CCTTTTAAAGAAACTGGCATGATTAATATTATAACACCCTGTTTTTTTTTTTTTTTTTTTTT  
TTTTATGACTG  
E\_oct\_5\_SE\_18

TCTTACCAACGCGTTACAAAATAAACGGAATCAGAACCTCCCTTTTTTTTTTTTTTTTTTTT  
TTTTATGACTG

E\_oct\_5\_SE\_19

AACCAATCAATAGTTTTTATTTTCATGCCAACGTAATCTGTTTTTTTTTTTTTTTTTTT  
TTTCGTATCA

E\_oct\_5\_SE\_20

TAAGAATAAACAAATTCTTACCAGTACCTTATTGGAATAAGTTTTTTTTTTTTTTTTTTT  
TTTCGTATCA

E\_oct\_5\_SE\_21

CAATAGATAATATAAATCCTTTGCCCGGCGGTCTCAATCAATTTTTTTTTTTTTTTTTTT  
TTTTAGACTCA

E\_oct\_5\_SE\_22

TTAATGCGCGAAAGATAAAACAGAGCCAGCCAACCAGTAATTTTTTTTTTTTTTTTTTTT  
TTTTAGACTCA

E\_oct\_5\_SE\_23

TAACCGTTGTAGTCCAGAACAATATTCGCCTGAACAAAATTTTTTTTTTTTTTTTTTTT  
TTTTAGACTCA

E\_oct\_5\_SE\_24

GAAATTGCGTAGGGAGAAACAATAACGTTATTAGCAATTCATTTTTTTTTTTTTTTTTTT  
TTTTAGACTCA

## **E\_oct\_6**

E\_oct\_6\_SE\_1

AAAGTACAACGGGTTACTTAGCCGGACTCAGCAATACGTAATTTTTTTTTTTTTTTTTTTT  
TTTTGTCATTGA

E\_oct\_6\_SE\_2

ATAGTTGCGCCGTTTTGCGGGATCGTGTTAGCGAGGAATTGCTTTTTTTTTTTTTTTTTTT  
TTTTACAGTTG

E\_oct\_6\_SE\_3

GTGAATTACCTTAACGGAACAACATTGGCGCAGGATATTCATTTTTTTTTTTTTTTTTTTT  
TTTATGGATGT

E\_oct\_6\_SE\_4

TTTTCAGGGATACCACAGACAGCCCTCAGGTAGATCATAACCTTTTTTTTTTTTTTTTTTT  
TTTTAGACTCA

E\_oct\_6\_SE\_5

ATTAAGCAATAAAATACTTTTGCGGGAGTTTCATATTTTCATTTTTTTTTTTTTTTTTTTT  
TTTCGTATCA

E\_oct\_6\_SE\_6

CGGATGGCTTAGTAAAGTACGGTGTCTTTCCGTCGGTGCGGTTTTTTTTTTTTTTTTTTT  
TTTTTCGTATCA

E\_oct\_6\_SE\_7

TGGGATAGGTCAAGATCGCACTCCAGCGGTTGAAATAGGAACTTTTTTTTTTTTTTTTTTT  
TTTTTCGTATCA

E\_oct\_6\_SE\_8  
AGGTCATTGCCTTGTCAATCATATGTGCCTTAGCCGGAGACTTTTTTTTTTTTTTTTTTT  
TTTTTCGTATCA

E\_oct\_6\_SE\_9  
TACTGCGGAATCTCAGGTCTTACCCTATTCTGGGGTTGATATTTTTTTTTTTTTTTTTT  
TTTTTCGTATCA

E\_oct\_6\_SE\_10  
TAATAAGTTTTAGCCTATTTTCGGAACCTTGATGGGGAACAAGATTTTTTTTTTTTTTTTTT  
TTTTTCGTATCA

E\_oct\_6\_SE\_11  
TCACCAGTGAGAAGCAGGCGAAAATCTCGTAATTTAATTGCGTTTTTTTTTTTTTTTTTT  
TTTTTCGTATCA

E\_oct\_6\_SE\_12  
CGACGTTGTAAACGGGTACCGAGCTCTATTATAGAGCTTCAATTTTTTTTTTTTTTTTTTT  
TTTTTCGTATCA

E\_oct\_6\_SE\_13  
ACCACCGGAACCTCAGAGCCGCCACCAAATCACTTAGCGTTTTTTTTTTTTTTTTTTTT  
TTTTTTCGTATCA

E\_oct\_6\_SE\_14  
AAGGTAAATATTTGGGAATTAGAGCTTTTTAAGAAAACCTTTTTTTTTTTTTTTTTTTTT  
TTTTTCGTATCA

E\_oct\_6\_SE\_15  
TTAATTTCCCTTAGGTCTGAGAGACACCACACTAAACAGGATTTTTTTTTTTTTTTTTTT  
TTTTTTCGTATCA

E\_oct\_6\_SE\_16  
CGTGCGGAGAAAGTCACGCTGCGCGTCCACCACTCCTCATTATTTTTTTTTTTTTTTTTTT  
TTTTTTCGTATCA

E\_oct\_6\_SE\_17  
CCTTTTTAAGAAACTGGCATGATTAAATATTATAACACCCTGTTTTTTTTTTTTTTTTTTTT  
TTTTTCGTATCA

E\_oct\_6\_SE\_18  
TCTTACCAACGCGTTACAAAATAAACGGAATCAGAACCTCCCTTTTTTTTTTTTTTTTTTT  
TTTTTTCGTATCA

E\_oct\_6\_SE\_19  
AACCAATCAATAGTTTTTATTTTCATGCCAACGTAATCTGTTTTTTTTTTTTTTTTTTTTT  
TTTCGTATCA

E\_oct\_6\_SE\_20  
TAAGAATAAACAAATTCTTACCAGTACCTTATTGGAATAAGTTTTTTTTTTTTTTTTTTTT  
TTTTTCGTATCA

E\_oct\_6\_SE\_21  
CAATAGATAATATAAATCCTTTGCCCGGCGGTCTCAATCAATTTTTTTTTTTTTTTTTTTTT  
TTTCAGTCATA

E\_oct\_6\_SE\_22  
TTAATGCGCGAAAGATAAAAACAGAGCCAGCCAACCAGTAATTTTTTTTTTTTTTTTTTTTT

TTTTAGAACAAC

E\_oct\_6\_SE\_23

TAACCGTTGTAGTCCAGAACAATATTCGCCTGAACAAAATTTTTTTTTTTTTTTTTTTT  
TTTAAGGTAGA

E\_oct\_6\_SE\_24

GAAATTGCGTAGGGAGAAACAATAACGTTATTAGCAATTCATTTTTTTTTTTTTTTTTT  
TTTTCACTAACT

**E\_oct\_7**

E\_oct\_7\_SE\_1

AAAGTACAACGGGTTACTTAGCCGGACTCAGCAATACGTAATTTTTTTTTTTTTTTTTTT  
TTTTGAGAACTA

E\_oct\_7\_SE\_2

ATAGTTGCGCCGTTTTGCGGGATCGTGTTAGCGAGGAATTGCTTTTTTTTTTTTTTTTTT  
TTTTATAGTGAG

E\_oct\_7\_SE\_3

GTGAATTACCTAACGGAACAACATTGGCGCAGGATATTCATTTTTTTTTTTTTTTTTTT  
TTTTTAGGAGT

E\_oct\_7\_SE\_4

TTTTCAGGGATACCACAGACAGCCCTCAGGTAGATCATAACCTTTTTTTTTTTTTTTTTT  
TTTTATCCGTTA

E\_oct\_7\_SE\_5

ATTAAGCAATAAAATACTTTTTCGGGAGTTTCATATTTTCATTTTTTTTTTTTTTTTTTT  
TTATAGTGAG

E\_oct\_7\_SE\_6

CGGATGGCTTAGTAAAGTACGGTGTCTTTCCGTCGGTGCGGTTTTTTTTTTTTTTTTTT  
TTTTATCCGTTA

E\_oct\_7\_SE\_7

TGGGATAGGTCAAGATCGCACTCCAGCGGTTGAAATAGGAACTTTTTTTTTTTTTTTTTT  
TTTTTTAGGAGT

E\_oct\_7\_SE\_8

AGGTCATGTCCTTGCAATCATATGTGCCTTAGCCGGAGACTTTTTTTTTTTTTTTTTTT  
TTTGAGAACTA

E\_oct\_7\_SE\_9

TACTGCGGAATCTCAGGTCTTACCCTATCTGGGGTTGATATTTTTTTTTTTTTTTTTT  
TTTTATGACTG

E\_oct\_7\_SE\_10

TAATAAGTTTTAGCCTATTCGGAACCTGATGGGGAACAAGATTTTTTTTTTTTTTTTTTT  
TTTTATGACTG

E\_oct\_7\_SE\_11

TCACCAGTGAGAAGCAGGCGAAAATCTCGTAATTAATTGCGTTTTTTTTTTTTTTTTTT  
TTTTTATGACTG

E\_oct\_7\_SE\_12

CGACGTTGTAAACGGGTACCGAGCTCTATTATAGAGCTTCAATTTTTTTTTTTTTTTTTTTT  
TTTTATGACTG

E\_oct\_7\_SE\_13

ACCACCGGAACCTCAGAGCCGCCACCAAATCACTTTAGCGTTTTTTTTTTTTTTTTTTT  
TTTTTTTAGGAGT

E\_oct\_7\_SE\_14

AAGGTAAATATTTGGGAATTAGAGCTTTTTAAGAAAACTTTTTTTTTTTTTTTTTTTTT  
TTTGAGAACTA

E\_oct\_7\_SE\_15

TTAATTTCCCTTAGGTCTGAGAGACACCACACTAACAGGATTTTTTTTTTTTTTTTTTTT  
TTTTATAGTGAG

E\_oct\_7\_SE\_16

CGTGGCGAGAAAGTCACGCTGCGCGTCCACCACTCCTCATTATTTTTTTTTTTTTTTTTT  
TTTTATCCGTTA

E\_oct\_7\_SE\_17

CCTTTTTAAGAAACTGGCATGATTAAATATTATAACACCCTGTTTTTTTTTTTTTTTTTTT  
TTTTCGTATCA

E\_oct\_7\_SE\_18

TCTTACCAACGCGTTACAAAATAAACGGAATCAGAACCTCCCTTTTTTTTTTTTTTTTTTTT  
TTTTTCGTATCA

E\_oct\_7\_SE\_19

AACCAATCAATAGTTTTTATTTTCATGCCAACGTAATCTGTTTTTTTTTTTTTTTTTTTTT  
TTTCGTATCA

E\_oct\_7\_SE\_20

TAAGAATAAACAAATTCTTACCAGTACCTTATTGGAATAAGTTTTTTTTTTTTTTTTTTTTT  
TTTTTCGTATCA

E\_oct\_7\_SE\_21

CAATAGATAATATAAATCCTTTGCCCGGCGGTCTCAATCAATTTTTTTTTTTTTTTTTTTTTT  
TTTATAGTGAG

E\_oct\_7\_SE\_22

TTTAATGCGCGAAAGATAAAAACAGAGCCAGCCAACCAGTAATTTTTTTTTTTTTTTTTTTTTT  
TTTTATCCGTTA

E\_oct\_7\_SE\_23

TAACCGTTGTAGTCCAGAACAATATTCGCCTGAACAAAATTTTTTTTTTTTTTTTTTTTTT  
TTTTTAGGAGT

E\_oct\_7\_SE\_24

GAAATTGCGTAGGGAGAAACAATAACGTTATTAGCAATTCATTTTTTTTTTTTTTTTTTTTTT  
TTTTGAGAACTA

## **P\_oct\_1**

P\_oct\_1\_SE\_1

ATCTTGACAAGAAAGGCTTGCCCTGATACCAAGCAGACGGTCTTTTTTTTTTTTTTTTTTTTTT  
TTTTACACACAT



P\_oct\_1\_SE\_2

AACCTAAAACGATTTGACCCCCAGCGGCAGGGACAGAGGCTTTTTTTTTTTTTTTTTTTT  
TTTTTACACACAT

P\_oct\_1\_SE\_3

AGGTAGAAAGATACTAATGCAGATACAAACACCAAGAAGACTGGTTTTTTTTTTTTTTTTTT  
TTTTTACACACAT

P\_oct\_1\_SE\_4

AACAGCTTGATAATTCGGTCGCTGAGCGCCAAACGAGAGGCTTTTTTTTTTTTTTTTTTTT  
TTTTTACACACAT

P\_oct\_1\_SE\_5

ATTAAGCAATAAAATACTTTTGCGGGAGTTTCATATTTTCATTTTTTTTTTTTTTTTTTTTT  
TTAGAACAAC

P\_oct\_1\_SE\_6

CGGATGGCTTAGTAAAGTACGGTGTCTTTCCGTCGGTGCAGTTTTTTTTTTTTTTTTTTTT  
TTTTCACTAACT

P\_oct\_1\_SE\_7

TGGGATAGGTCAAGATCGCACTCCAGCGGTTGAAATAGGAACTTTTTTTTTTTTTTTTTTTT  
TTTTTGATACGA

P\_oct\_1\_SE\_8

AGGTCATTGCCTTGTCATCATATGTGCCTTAGCCGGAGACTTTTTTTTTTTTTTTTTTTTTT  
TTTCAGTCATA

P\_oct\_1\_SE\_9

TTCATTGAATCCTCAGGTCTTTACCCTATGGGAATTTTTTCATTTTTTTTTTTTTTTTTTTTT  
TTAGAACAAC

P\_oct\_1\_SE\_10

GCATTCCACAGATAGTAAATGAATTTTTGATGGGGAACAAGATTTTTTTTTTTTTTTTTTTTT  
TTTTCACTAACT

P\_oct\_1\_SE\_11

TCACCAGTGAGAAGCAGGCGAAAATCTCGTAATTTAATTGCGTTTTTTTTTTTTTTTTTTTTT  
TTTTTGATACGA

P\_oct\_1\_SE\_12

CGACGTTGTAAACGGGTACCGAGCTCTATTATAGAGCTTCAATTTTTTTTTTTTTTTTTTTTT  
TTTCAGTCATA

P\_oct\_1\_SE\_13

AAGAGAAGGATTTTGATATAAGTATAGCCAGAACAGTGCCTTTTTTTTTTTTTTTTTTTTTT  
TTTTAGAACAAC

P\_oct\_1\_SE\_14

AGCCGCCGCCAGAAATAAATCCTCATAACCAATAAGCCGTTTTTTTTTTTTTTTTTTTTTTTT  
TTTTCACTAACT

P\_oct\_1\_SE\_15

AATAACAACATAATTTACGAGCATGTTTTGAAGGCGGTCAGTTTTTTTTTTTTTTTTTTTTT  
TTTTTGATACGA

P\_oct\_1\_SE\_16

CAGTAATAAAAGACGTGGCACAGACAGGAATAGCCACCACCCTTTTTTTTTTTTTTTTTTTTT

TTTTTCAGTCATA

P\_oct\_1\_SE\_17

GATAGCAGCACCTAGCGTCAGACTGTCATTCAAGCCATTTGGTTTTTTTTTTTTTTTTTTT  
TTTTAGAACAAC

P\_oct\_1\_SE\_18

TTATTTTGTACCCAAAGACAAAAGGACAAAGTACGCAGTATTTTTTTTTTTTTTTTTTTT  
TTTTCACTAACT

P\_oct\_1\_SE\_19

ACCCACAAGAATAAGTAAGCAGATAGTTTATCAAATGAAATTTTTTTTTTTTTTTTTTTT  
TTTTTGATACGA

P\_oct\_1\_SE\_20

GGCGTTTTAGCGTTTTGCACCCAGCTCGTTTTCCACCACCGTTTTTTTTTTTTTTTTTTT  
TTTTTCAGTCATA

P\_oct\_1\_SE\_21

TTACCTTTTTTAAATCGTCGCTATTATTTTCAGGTCGCGCAGATTTTTTTTTTTTTTTTTTTT  
TTCTCACTAT

P\_oct\_1\_SE\_22

TACTTCTGAATATAAAGAAATTGCGTTTTGAGGATTTTGCAGTTTTTTTTTTTTTTTTTTTTT  
TTTCTCACTAT

P\_oct\_1\_SE\_23

GGTCAGTTGGCACCGTCAATAGATAAACCGGAAAATCGCCATTTTTTTTTTTTTTTTTTTTTT  
TTTTTCTCACTAT

P\_oct\_1\_SE\_24

TAGTTAATTTACGTTAAATAAGAATATTTTCCTTTTTTAACCTTTTTTTTTTTTTTTTTTTTTT  
TTCTCACTAT

## **P\_oct\_2**

P\_oct\_2\_SE\_1

ATCTTGACAAGAAAGGCTTGCCCTGATACCAAGCAGACGGTCTTTTTTTTTTTTTTTTTTTTTT  
TTTTATAGTGAG

P\_oct\_2\_SE\_2

AACCTAAAACGATTTGACCCCCAGCGGCAGGGACAGAGGCTTTTTTTTTTTTTTTTTTTTTT  
TTTTTATAGTGAG

P\_oct\_2\_SE\_3

AGGTAGAAAGATACTAATGCAGATACAAACACCAAGAAGTGGTTTTTTTTTTTTTTTTTTTTT  
TTTTTATAGTGAG

P\_oct\_2\_SE\_4

AACAGCTTGATAATTCGGTCGCTGAGCGCCAAACGAGAGGCTTTTTTTTTTTTTTTTTTTTTT  
TTTTTATAGTGAG

P\_oct\_2\_SE\_5

ATTAAGCAATAAAATACTTTTGCGGGAGTTTCATATTTTCATTTTTTTTTTTTTTTTTTTTTT  
TTAAGGTAGA

P\_oct\_2\_SE\_6

CGGATGGCTTAGTAAAGTACGGTGTCCCTTCCGTCGGTGCGGTTTTTTTTTTTTTTTTTT  
TTTTTGCTTGAA  
P\_oct\_2\_SE\_7  
TGGGATAGGTCAAGATCGCACTCCAGCGGTTGAAATAGGAACTTTTTTTTTTTTTTTTTT  
TTTTTTAGGAGT  
P\_oct\_2\_SE\_8  
AGGTCATTGCCTTGTCATCATATGTGCCTTAGCCGGAGACTTTTTTTTTTTTTTTTTTT  
TTTGAGAACTA  
P\_oct\_2\_SE\_9  
TTCATTGAATCCTCAGGTCTTTACCCTATGGGAATTTTTTCATTTTTTTTTTTTTTTTTT  
TTAAGGTAGA  
P\_oct\_2\_SE\_10  
GCATTCCACAGATAGTAAATGAATTTTTGATGGGGAACAAGATTTTTTTTTTTTTTTTTT  
TTTTTGCTTGAA  
P\_oct\_2\_SE\_11  
TCACCAGTGAGAAGCAGGCGAAAATCTCGTAATTTAATTGCGTTTTTTTTTTTTTTTTTT  
TTTTTTAGGAGT  
P\_oct\_2\_SE\_12  
CGACGTTGTAAACGGGTACCGAGCTCTATTATAGAGCTTCAATTTTTTTTTTTTTTTTTT  
TTTGAGAACTA  
P\_oct\_2\_SE\_13  
AAGAGAAGGATTTTGATATAAGTATAGCCAGAACAGTGCCTTTTTTTTTTTTTTTTTTT  
TTTTAAGGTAGA  
P\_oct\_2\_SE\_14  
AGCCGCCGCCAGAAATAAATCCTCATAACCAATAAGCCGTTTTTTTTTTTTTTTTTTTT  
TTTTTGCTTGAA  
P\_oct\_2\_SE\_15  
AATAACAACATAATTTACGAGCATGTTTTGAAGGCGGTCAGTTTTTTTTTTTTTTTTTT  
TTTTTTAGGAGT  
P\_oct\_2\_SE\_16  
CAGTAATAAAAGACGTGGCACAGACAGGAATAGCCACCACCCTTTTTTTTTTTTTTTTTT  
TTTTTGAGAACTA  
P\_oct\_2\_SE\_17  
GATAGCAGCACCTAGCGTCAGACTGTCATTCAAGCCATTTGGTTTTTTTTTTTTTTTTTT  
TTTTAAGGTAGA  
P\_oct\_2\_SE\_18  
TTATTTGTACCCAAAGACAAAAGGACAAAGTACGCAGTATTTTTTTTTTTTTTTTTTT  
TTTTTGCTTGAA  
P\_oct\_2\_SE\_19  
ACCCACAAGAATAAGTAAGCAGATAGTTTTATCAAATGAAATTTTTTTTTTTTTTTTTTT  
TTTTTTAGGAGT  
P\_oct\_2\_SE\_20  
GGCGTTTTAGCGTTTTGCACCCAGCTCGTTTTCCACCACCGTTTTTTTTTTTTTTTTTT  
TTTTGAGAACTA

P\_oct\_2\_SE\_21

TTACCTTTTTTAAATCGTCGCTATTATTTTCAGGTCGCGCAGATTTTTTTTTTTTTTTTTTTT  
TTATGTGTGT

P\_oct\_2\_SE\_22

TACTTCTGAATATAAAGAAATTGCGTTTTGAGGATTTTGC GGTTTTTTTTTTTTTTTTTTT  
TTTATGTGTGT

P\_oct\_2\_SE\_23

GGTCAGTTGGCACCGTCAATAGATAAACCGGAAAATCGCCATTTTTTTTTTTTTTTTTTTT  
TTTTATGTGTGT

P\_oct\_2\_SE\_24

TAGTTAATTTACGTTAAATAAGAATATTTTCCTTTTAACTTTTTTTTTTTTTTTTTTTT  
TTATGTGTGT

### **P\_oct\_3**

P\_oct\_3\_SE\_1

ATCTTGACAAGAAAGGCTTGCCCTGATACCAAGCAGACGGTCTTTTTTTTTTTTTTTTTTTT  
TTTTCAACTGTA

P\_oct\_3\_SE\_2

AACCTAAAACGATTTGACCCCCAGCGGCAGGGACAGAGGCTTTTTTTTTTTTTTTTTTTT  
TTTTTCAACTGTA

P\_oct\_3\_SE\_3

AGGTAGAAAGATACTAATGCAGATACAAACACCAAGAACTGGTTTTTTTTTTTTTTTTTTT  
TTTTTCAACTGTA

P\_oct\_3\_SE\_4

AACAGCTTGATAATTCGGTCGCTGAGCGCCAAACGAGAGGCTTTTTTTTTTTTTTTTTTTT  
TTTTTCAACTGTA

P\_oct\_3\_SE\_5

ATTAAGCAATAAAATACTTTTGC GGGAGTTTCATATTTTCATTTTTTTTTTTTTTTTTTTT  
TTCATCAAGT

P\_oct\_3\_SE\_6

CGGATGGCTTAGTAAAGTACGGTGTCTTTCCGTCGGTGC GGTTTTTTTTTTTTTTTTTTT  
TTTTACATCCAT

P\_oct\_3\_SE\_7

TGGGATAGGTCAAGATCGCACTCCAGCGGTTGAAATAGGAACTTTTTTTTTTTTTTTTTTTT  
TTTTTCCATACT

P\_oct\_3\_SE\_8

AGGTCATTGCCTTGTC AATCATATGTGCCTTAGCCGGAGACTTTTTTTTTTTTTTTTTTTT  
TTATCTACAC

P\_oct\_3\_SE\_9

TTCATTGAATCCTCAGGTCTTACCCTATGGGAATTTTTTCATTTTTTTTTTTTTTTTTTTT  
TTCATCAAGT

P\_oct\_3\_SE\_10

GCATTCCACAGATAGTAAATGAATTTTGTATGGGGAACAAGATTTTTTTTTTTTTTTTTTTT

TTTTACATCCAT  
P\_oct\_3\_SE\_11  
TCACCAGTGAGAAGCAGGCGAAAATCTCGTAATTTAATTGCGTTTTTTTTTTTTTTTTTTTT  
TTTTTCCATACT  
P\_oct\_3\_SE\_12  
CGACGTGTGAAACGGGTACCGAGCTCTATTATAGAGCTTCAATTTTTTTTTTTTTTTTTTTTT  
TTTATCTACAC  
P\_oct\_3\_SE\_13  
AAGAGAAGGATTTTGATATAAGTATAGCCAGAACAGTGCCTTTTTTTTTTTTTTTTTTTTT  
TTTTCATCAAGT  
P\_oct\_3\_SE\_14  
AGCCGCCGCCAGAAATAAATCCTCATAACCAATAAGCCGTTTTTTTTTTTTTTTTTTTTTTTT  
TTTTACATCCAT  
P\_oct\_3\_SE\_15  
AATAACAACATAATTTACGAGCATGTTTTGAAGGCGGTCAGTTTTTTTTTTTTTTTTTTTT  
TTTTTCCATACT  
P\_oct\_3\_SE\_16  
CAGTAATAAAAGACGTGGCACAGACAGGAATAGCCACCACCCTTTTTTTTTTTTTTTTTTTTT  
TTTTTATCTACAC  
P\_oct\_3\_SE\_17  
GATAGCAGCACCTAGCGTCAGACTGTCATTCAAGCCATTTGGTTTTTTTTTTTTTTTTTTTT  
TTTTCATCAAGT  
P\_oct\_3\_SE\_18  
TTATTTTGTACCCAAAGACAAAAGGACAAAGTACGCAGTATTTTTTTTTTTTTTTTTTTTT  
TTTTACATCCAT  
P\_oct\_3\_SE\_19  
ACCCACAAGAATAAGTAAGCAGATAGTTTATCAAAATGAAATTTTTTTTTTTTTTTTTTTTT  
TTTTTCCATACT  
P\_oct\_3\_SE\_20  
GGCGTTTTAGCGTTTTGCACCCAGCTCGTTTTCCACCACCGTTTTTTTTTTTTTTTTTTTT  
TTTTATCTACAC  
P\_oct\_3\_SE\_21  
TTACTTTTTTAAATCGTCGCTATTATTTTCAGGTCGCGCAGATTTTTTTTTTTTTTTTTTTTT  
TTATCCGTTA  
P\_oct\_3\_SE\_22  
TACTTCTGAATATAAAGAAATTGCGTTTTGAGGATTTTGCAGTTTTTTTTTTTTTTTTTTTT  
TTTATCCGTTA  
P\_oct\_3\_SE\_23  
GGTCAGTTGGCACCGTCAATAGATAAACCGGAAAATCGCCATTTTTTTTTTTTTTTTTTTTT  
TTTTATCCGTTA  
P\_oct\_3\_SE\_24  
TAGTTAATTTACGTTAAATAAGAATATTTTCCTTTTAAACCTTTTTTTTTTTTTTTTTTTTT  
TTATCCGTTA

**P\_oct\_4**

P\_oct\_4\_SE\_1

ATCTTGACAAGAAAGGCTTGCCCTGATACCAAGCAGACGGTCTTTTTTTTTTTTTTTTTTT  
TTTTATGTGTGT

P\_oct\_4\_SE\_2

AACCTAAAACGATTTGACCCCCAGCGGCAGGGACAGAGGCTTTTTTTTTTTTTTTTTTT  
TTTTATGTGTGT

P\_oct\_4\_SE\_3

AGGTAGAAAGATACTAATGCAGATACAAACACCAAGAACTGGTTTTTTTTTTTTTTTTTT  
TTTTATGTGTGT

P\_oct\_4\_SE\_4

AACAGCTTGATAATTCGGTCGCTGAGCGCCAAACGAGAGGCTTTTTTTTTTTTTTTTTTT  
TTTTATGTGTGT

P\_oct\_4\_SE\_5

ATTAAGCAATAAAAATACTTTTGCGGGAGTTTCATATTTTCATTTTTTTTTTTTTTTTTTT  
TACTTGATG

P\_oct\_4\_SE\_6

CGGATGGCTTAGTAAAGTACGGTGCCTTCCGTCGGTGCGGTTTTTTTTTTTTTTTTTTT  
TTTGTGTAGAT

P\_oct\_4\_SE\_7

TGGGATAGGTCAAGATCGCACTCCAGCGGTTGAAATAGGAACTTTTTTTTTTTTTTTTTTT  
TTTAGTATGGA

P\_oct\_4\_SE\_8

AGGTCATTGCCTTGTCATCATATGTGCCTTAGCCGGAGACTTTTTTTTTTTTTTTTTTTT  
TTTATGGATGT

P\_oct\_4\_SE\_9

TTCATTGAATCCTCAGGTCTTTACCCTATGGGAATTTTTTCATTTTTTTTTTTTTTTTTTT  
TACTTGATG

P\_oct\_4\_SE\_10

GCATTCCACAGATAGTAAATGAATTTTTGATGGGGAACAAGATTTTTTTTTTTTTTTTTTT  
TTTTGTGTAGAT

P\_oct\_4\_SE\_11

TCACCAGTGAGAAGCAGGCGAAAATCTCGTAATTTAATTGCGTTTTTTTTTTTTTTTTTTT  
TTTAGTATGGA

P\_oct\_4\_SE\_12

CGACGTTGTAAACGGGTACCGAGCTCTATTATAGAGCTTCAATTTTTTTTTTTTTTTTTTT  
TTTATGGATGT

P\_oct\_4\_SE\_13

AAGAGAAGGATTTTGATATAAGTATAGCCAGAACAGTGCCTTTTTTTTTTTTTTTTTTTT  
TTTTACTTGATG

P\_oct\_4\_SE\_14

AGCCGCCGCCAGAAATAAATCCTCATAACCAATAAGCCGTTTTTTTTTTTTTTTTTTTTTT  
TTTTGTGTAGAT

P\_oct\_4\_SE\_15

AATAAACAAACATAATTTACGAGCATGTTTTGAAGGCGGTCAGTTTTTTTTTTTTTTTTTT  
TTTTAGTATGGA

P\_oct\_4\_SE\_16

CAGTAATAAAAGACGTGGCACAGACAGGAATAGCCACCACCCTTTTTTTTTTTTTTTTTT  
TTTTTATGGATGT

P\_oct\_4\_SE\_17

GATAGCAGCACCTAGCGTCAGACTGTCATTCAAGCCATTTGGTTTTTTTTTTTTTTTTTT  
TTTTACTTGATG

P\_oct\_4\_SE\_18

TTATTTTGTACCCAAAGACAAAAGGACAAAGTACGCAGTATTTTTTTTTTTTTTTTTTT  
TTTTGTGTAGAT

P\_oct\_4\_SE\_19

ACCCACAAGAATAAGTAAGCAGATAGTTTATCAAATGAAATTTTTTTTTTTTTTTTTTT  
TTTTAGTATGGA

P\_oct\_4\_SE\_20

GGCGTTTTAGCGTTTTGCACCCAGCTCGTTTTCCACCACCGGTTTTTTTTTTTTTTTTTT  
TTTTATGGATGT

P\_oct\_4\_SE\_21

TTACCTTTTTAAATCGTCGCTATTATTCAGGTCGCGCAGATTTTTTTTTTTTTTTTTTT  
TTATAGTGAG

P\_oct\_4\_SE\_22

TACTTCTGAATATAAAGAAATTGCGTTTTGAGGATTTTGCAGTTTTTTTTTTTTTTTTTT  
TTTATAGTGAG

P\_oct\_4\_SE\_23

GGTCAGTTGGCACCGTCAATAGATAAACCGGAAAATCGCCATTTTTTTTTTTTTTTTTTT  
TTTTATAGTGAG

P\_oct\_4\_SE\_24

TAGTTAATTCACGTAAATAAGAATATTTTCCTTTTAACTTTTTTTTTTTTTTTTTTT  
TTATAGTGAG

## **P\_oct\_5**

P\_oct\_5\_SE\_1

ATCTTGACAAGAAAGGCTTGCCCTGATACCAAGCAGACGGTCTTTTTTTTTTTTTTTTTTT  
TTTTATCCGTTA

P\_oct\_5\_SE\_2

AACCTAAAACGATTTGACCCCCAGCGGCAGGGACAGAGGCTTTTTTTTTTTTTTTTTTT  
TTTTATCCGTTA

P\_oct\_5\_SE\_3

AGGTAGAAAGATACTAATGCAGATACAAACACCAAGAAGTGGTTTTTTTTTTTTTTTTTT  
TTTTATCCGTTA

P\_oct\_5\_SE\_4

AACAGCTTGATAATTCGGTCGCTGAGCGCCAAACGAGAGGCTTTTTTTTTTTTTTTTTTT

TTTTTATCCGTTA

P\_oct\_5\_SE\_5

ATTAAGCAATAAAATACTTTTGCGGGAGTTTCATATTTTCATTTTTTTTTTTTTTTTTTTTTTTT  
TTCATCAAGT

P\_oct\_5\_SE\_6

CGGATGGCTTAGTAAAGTACGGTGTCTTTCCGTCGGTGCGGTTTTTTTTTTTTTTTTTTTTTTT  
TTTTACATCCAT

P\_oct\_5\_SE\_7

TGGGATAGGTCAAGATCGCACTCCAGCGGTTGAAATAGGAACTTTTTTTTTTTTTTTTTTTTTTTT  
TTTTTCCATACT

P\_oct\_5\_SE\_8

AGGTCATTGCCTTGTCATCATATGTGCCTTAGCCGGAGACTTTTTTTTTTTTTTTTTTTTTTTT  
TTTATCTACAC

P\_oct\_5\_SE\_9

TTCATTGAATCCTCAGGTCTTTACCCTATGGGAATTTTTCATTTTTTTTTTTTTTTTTTTTTTTT  
TTCATCAAGT

P\_oct\_5\_SE\_10

GCATTCCACAGATAGTAAATGAATTTTTGATGGGGAACAAGATTTTTTTTTTTTTTTTTTTTTTTT  
TTTTACATCCAT

P\_oct\_5\_SE\_11

TCACCAGTGAGAAGCAGGCGAAAATCTCGTAATTTAATTGCGTTTTTTTTTTTTTTTTTTTTTTT  
TTTTTCCATACT

P\_oct\_5\_SE\_12

CGACGTTGTAAACGGGTACCGAGCTCTATTATAGAGCTTCAATTTTTTTTTTTTTTTTTTTTTTTT  
TTTATCTACAC

P\_oct\_5\_SE\_13

AAGAGAAGGATTTTGATATAAGTATAGCCAGAACAGTGCCTTTTTTTTTTTTTTTTTTTTTTTT  
TTTTCATCAAGT

P\_oct\_5\_SE\_14

AGCCGCCGCCAGAAATAAATCCTCATAACCAATAAGCCGTTTTTTTTTTTTTTTTTTTTTTTTTT  
TTTTACATCCAT

P\_oct\_5\_SE\_15

AATAACAACATAATTTACGAGCATGTTTTGAAGGCGGTCAGTTTTTTTTTTTTTTTTTTTTTTTTT  
TTTTTCCATACT

P\_oct\_5\_SE\_16

CAGTAATAAAAGACGTGGCACAGACAGGAATAGCCACCACCCTTTTTTTTTTTTTTTTTTTTTTTT  
TTTTTATCTACAC

P\_oct\_5\_SE\_17

GATAGCAGCACCTAGCGTCAGACTGTCATTCAAGCCATTTGGTTTTTTTTTTTTTTTTTTTTTTTTT  
TTTTCATCAAGT

P\_oct\_5\_SE\_18

TTATTTGTACCCAAAGACAAAAGGACAAAGTACGCAGTATTTTTTTTTTTTTTTTTTTTTTTTTTT  
TTTTACATCCAT

P\_oct\_5\_SE\_19



ACCCACAAGAATAAGTAAGCAGATAGTTTTATCAAATGAAATTTTTTTTTTTTTTTTTTT  
TTTTCCATACT

P\_oct\_5\_SE\_20

GGCGTTTTAGCGTTTTGCACCCAGCTCGTTTTCCACCACCGTTTTTTTTTTTTTTTTTT  
TTTTATCTACAC

P\_oct\_5\_SE\_21

TTACTTTTTTAAATCGTCGCTATTATTTTCAGGTCGCGCAGATTTTTTTTTTTTTTTTTTT  
TTCAACTGTA

P\_oct\_5\_SE\_22

TACTTCTGAATATAAAGAAATTGCGTTTTGAGGATTTTGCAGTTTTTTTTTTTTTTTTTT  
TTTCAACTGTA

P\_oct\_5\_SE\_23

GGTCAGTTGGCACCGTCAATAGATAAACCGGAAAATCGCCATTTTTTTTTTTTTTTTTTT  
TTTTCAACTGTA

P\_oct\_5\_SE\_24

TAGTTAATTTACGTTAAATAAGAATATTTTCCTTTTAACTTTTTTTTTTTTTTTTTTT  
TTCAACTGTA

## **P\_oct\_6**

P\_oct\_6\_SE\_1

ATCTTGACAAGAAAGGCTTGCCCTGATACCAAGCAGACGGTCTTTTTTTTTTTTTTTTTTT  
TTTTATAGTGAG

P\_oct\_6\_SE\_2

AACCTAAAACGATTTGACCCCCAGCGGCAGGGACAGAGGCTTTTTTTTTTTTTTTTTTT  
TTTTTATAGTGAG

P\_oct\_6\_SE\_3

AGGTAGAAAGATACTAATGCAGATACAAACACCAAGAAGACTGGTTTTTTTTTTTTTTTTTT  
TTTTTATAGTGAG

P\_oct\_6\_SE\_4

AACAGCTTGATAATTCGGTCGCTGAGCGCCAAACGAGAGGCTTTTTTTTTTTTTTTTTTT  
TTTTTATAGTGAG

P\_oct\_6\_SE\_5

ATTAAGCAATAAAATACTTTTGCGGGAGTTTCATATTTTCATTTTTTTTTTTTTTTTTTT  
TACTTGATG

P\_oct\_6\_SE\_6

CGGATGGCTTAGTAAAGTACGGTGTCTTTCCGTCGGTGCGGTTTTTTTTTTTTTTTTTT  
TTTTGTGTAGAT

P\_oct\_6\_SE\_7

TGGGATAGGTCAAGATCGCACTCCAGCGGTTGAAATAGGAACTTTTTTTTTTTTTTTTTTT  
TTTTAGTATGGA

P\_oct\_6\_SE\_8

AGGTCATGCTTGTCAATCATATGTGCCTTTAGCCGGAGACTTTTTTTTTTTTTTTTTTT  
TTTATGGATGT

P\_oct\_6\_SE\_9

TTCATTGAATCCTCAGGTCTTTACCCTATGGGAATTTTTTCATTTTTTTTTTTTTTTTTTTT  
T TACTTGATG

P\_oct\_6\_SE\_10

GCATTCCACAGATAGTAAATGAATTTTTGATGGGGAACAAGATTTTTTTTTTTTTTTTTTT  
TTTTGTGTAGAT

P\_oct\_6\_SE\_11

TCACCAGTGAGAAGCAGGCGAAAATCTCGTAATTTAATTGCGTTTTTTTTTTTTTTTTTTT  
TTTTAGTATGGA

P\_oct\_6\_SE\_12

CGACGTTGTAAACGGGTACCGAGCTCTATTATAGAGCTTCAATTTTTTTTTTTTTTTTTTT  
TTTATGGATGT

P\_oct\_6\_SE\_13

AAGAGAAGGATTTTGATATAAGTATAGCCAGAACAGTGCCTTTTTTTTTTTTTTTTTTTT  
TTTTACTTGATG

P\_oct\_6\_SE\_14

AGCCGCCGCCAGAAATAAATCCTCATAACCAATAAGCCGTTTTTTTTTTTTTTTTTTTTTT  
TTTTGTGTAGAT

P\_oct\_6\_SE\_15

AATAACAACATAATTTACGAGCATGTTTGAAGGCGGTCAGTTTTTTTTTTTTTTTTTTTT  
TTTTAGTATGGA

P\_oct\_6\_SE\_16

CAGTAATAAAAGACGTGGCACAGACAGGAATAGCCACCACCCTTTTTTTTTTTTTTTTTTT  
TTTTTATGGATGT

P\_oct\_6\_SE\_17

GATAGCAGCACCTAGCGTCAGACTGTCATTCAAGCCATTTGGTTTTTTTTTTTTTTTTTTTT  
TTTTACTTGATG

P\_oct\_6\_SE\_18

TTATTTTGTACCCAAAGACAAAAGGACAAAGTACGCAGTATTTTTTTTTTTTTTTTTTTTT  
TTTTGTGTAGAT

P\_oct\_6\_SE\_19

ACCCACAAGAATAAGTAAGCAGATAGTTTATCAAATGAAATTTTTTTTTTTTTTTTTTTTT  
TTTTAGTATGGA

P\_oct\_6\_SE\_20

GGCGTTTTAGCGTTTTTGCACCCAGCTCGTTTTCCACCACCGTTTTTTTTTTTTTTTTTTTT  
TTTTATGGATGT

P\_oct\_6\_SE\_21

TTACCTTTTTAAATCGTCGCTATTATTTTCAGGTCGCGCAGATTTTTTTTTTTTTTTTTTTTT  
TTATGTGTGT

P\_oct\_6\_SE\_22

TACTTCTGAATATAAAGAAATTGCGTTTTGAGGATTTTGCAGTTTTTTTTTTTTTTTTTTTT  
TTTTATGTGTGT

P\_oct\_6\_SE\_23

GGTCAGTTGGCACCGTCAATAGATAAACCGGAAAATCGCCATTTTTTTTTTTTTTTTTTTTT

TTTTATGTGTGT

P\_oct\_6\_SE\_24

TAGTTAATTTACAGTTAAATAAGAATATTTTCCTTTTTAACCTTTTTTTTTTTTTTTTTTTT  
TTATGTGTGT

**P\_oct\_7**

P\_oct\_7\_SE\_1

ATCTTGACAAGAAAGGCTTGCCCTGATACCAAGCAGACGGTCTTTTTTTTTTTTTTTTTTTT  
TTTTATAGTGAG

P\_oct\_7\_SE\_2

AACCTAAAACGATTTGACCCCCAGCGGCAGGGACAGAGGCTTTTTTTTTTTTTTTTTTTT  
TTTTATAGTGAG

P\_oct\_7\_SE\_3

AGGTAGAAAGATACTAATGCAGATACAAACACCAAGAACTGGTTTTTTTTTTTTTTTTTTT  
TTTTATAGTGAG

P\_oct\_7\_SE\_4

AACAGCTTGATAATTCGGTCGCTGAGCGCCAAACGAGAGGCTTTTTTTTTTTTTTTTTTTT  
TTTTATAGTGAG

P\_oct\_7\_SE\_5

ATTAAGCAATAAAATACTTTTGCGGGAGTTTCATATTTTCATTTTTTTTTTTTTTTTTTTT  
TTTGCTTGAA

P\_oct\_7\_SE\_6

CGGATGGCTTAGTAAAGTACGGTGCCTTCCGTCGGTGCGGTTTTTTTTTTTTTTTTTTTTT  
TTTTTGCTTGAA

P\_oct\_7\_SE\_7

TGGGATAGGTCAAGATCGCACTCCAGCGGTTGAAATAGGAACTTTTTTTTTTTTTTTTTTTT  
TTTTTGCTTGAA

P\_oct\_7\_SE\_8

AGGTCATTGCCTTGTCATCATATGTGCCTTAGCCGGAGACTTTTTTTTTTTTTTTTTTTTTT  
TTTTGCTTGAA

P\_oct\_7\_SE\_9

TTCATTGAATCCTCAGGTCTTACCCTATGGGAATTTTTTCATTTTTTTTTTTTTTTTTTTTTT  
TTTGCTTGAA

P\_oct\_7\_SE\_10

GCATTCCACAGATAGTAAATGAATTTTTGATGGGGAACAAGATTTTTTTTTTTTTTTTTTTTTT  
TTTTTGCTTGAA

P\_oct\_7\_SE\_11

TCACCAGTGAGAAGCAGGCGAAAATCTCGTAATTTAATTGCGTTTTTTTTTTTTTTTTTTTTT  
TTTTTGCTTGAA

P\_oct\_7\_SE\_12

CGACGTTGTAAACGGGTACCGAGCTCTATTATAGAGCTTCAATTTTTTTTTTTTTTTTTTTTTT  
TTTTGCTTGAA

P\_oct\_7\_SE\_13

AAGAGAAGGATTTTGATATAAGTATAGCCAGAACAGTGCCTTTTTTTTTTTTTTTTTTTT  
TTTTTGCTTGAA

P\_oct\_7\_SE\_14

AGCCGCCGCCAGAAATAAATCCTCATAACCAATAAGCCGTTTTTTTTTTTTTTTTTTT  
TTTTTGCTTGAA

P\_oct\_7\_SE\_15

AATAACAACATAATTTACGAGCATGTTTGAAGGCGGTCAGTTTTTTTTTTTTTTTTTT  
TTTTTGCTTGAA

P\_oct\_7\_SE\_16

CAGTAATAAAAGACGTGGCACAGACAGGAATAGCCACCACCCTTTTTTTTTTTTTTTTT  
TTTTTTGCTTGAA

P\_oct\_7\_SE\_17

GATAGCAGCACCTAGCGTCAGACTGTCATTCAAGCCATTTGGTTTTTTTTTTTTTTTTTT  
TTTTTGCTTGAA

P\_oct\_7\_SE\_18

TTATTTTGTACCCAAAGACAAAAGGACAAAGTACGCAGTATTTTTTTTTTTTTTTTTTT  
TTTTTGCTTGAA

P\_oct\_7\_SE\_19

ACCCACAAGAATAAGTAAGCAGATAGTTTATCAAATGAAATTTTTTTTTTTTTTTTTTT  
TTTTTGCTTGAA

P\_oct\_7\_SE\_20

GGCGTTTAGCGTTTTGCACCCAGCTCGTTTTCCACCACCGTTTTTTTTTTTTTTTTTT  
TTTTTGCTTGAA

P\_oct\_7\_SE\_21

TTACCTTTTTTAAATCGTCGCTATTATTCAGGTCGCGCAGATTTTTTTTTTTTTTTTTTT  
TTATCTACAC

P\_oct\_7\_SE\_22

TACTTCTGAATATAAAGAAATTGCGTTTTGAGGATTTGCGGTTTTTTTTTTTTTTTTTT  
TTATCTACAC

P\_oct\_7\_SE\_23

GGTCAGTTGGCACCGTCAATAGATAAACCGGAAAATCGCCATTTTTTTTTTTTTTTTTTT  
TTTATCTACAC

P\_oct\_7\_SE\_24

TAGTTAATTTACGTTAAATAAGAATATTTTCCTTTTAAACCTTTTTTTTTTTTTTTTTTT  
TTATCTACAC

## **P\_oct\_8**

P\_oct\_8\_SE\_1

ATCTTGACAAGAAAGGCTTGCCCTGATACCAAGCAGACGGTCTTTTTTTTTTTTTTTTTTT  
TTTTGTGTAGAT

P\_oct\_8\_SE\_2

AACCTAAAACGATTTGACCCCCAGCGGCAGGGACAGAGGCTTTTTTTTTTTTTTTTTTT  
TTTTGTGTAGAT

P\_oct\_8\_SE\_3

AGGTAGAAAGATACTAATGCAGATACAAACACCAAGAACTGGTTTTTTTTTTTTTTTTTT  
TTTTTGTGTAGAT

P\_oct\_8\_SE\_4

AACAGCTTGATAATTCGGTCGCTGAGCGCCAAACGAGAGGCTTTTTTTTTTTTTTTTTTT  
TTTTTGTGTAGAT

P\_oct\_8\_SE\_5

ATTAAGCAATAAAATACTTTTGCGGGAGTTTCATATTTTCATTTTTTTTTTTTTTTTTTTT  
TTTGATACGA

P\_oct\_8\_SE\_6

CGGATGGCTTAGTAAAGTACGGTGTCTTTCCGTCGGTGCGGTTTTTTTTTTTTTTTTTTT  
TTTTTGATACGA

P\_oct\_8\_SE\_7

TGGGATAGGTCAAGATCGCACTCCAGCGGTTGAAATAGGAACTTTTTTTTTTTTTTTTTTT  
TTTTTGATACGA

P\_oct\_8\_SE\_8

AGGTCATTGCCTTGTCATCATATGTGCCTTAGCCGGAGACTTTTTTTTTTTTTTTTTTTT  
TTTTGATACGA

P\_oct\_8\_SE\_9

TTCATTGAATCCTCAGGTCTTTACCCTATGGGAATTTTTCATTTTTTTTTTTTTTTTTTTT  
TTTTGATACGA

P\_oct\_8\_SE\_10

GCATTCCACAGATAGTAAATGAATTTTGGATGGGGAACAAGATTTTTTTTTTTTTTTTTTTT  
TTTTTGATACGA

P\_oct\_8\_SE\_11

TCACCAGTGAGAAGCAGGCGAAAATCTCGTAATTTAATTGCGTTTTTTTTTTTTTTTTTTT  
TTTTTGATACGA

P\_oct\_8\_SE\_12

CGACGTTGTAAACGGGTACCGAGCTCTATTATAGAGCTTCAATTTTTTTTTTTTTTTTTTTT  
TTTTGATACGA

P\_oct\_8\_SE\_13

AAGAGAAGGATTTTGATATAAGTATAGCCAGAACAGTGCCTTTTTTTTTTTTTTTTTTTT  
TTTTTGATACGA

P\_oct\_8\_SE\_14

AGCCGCCGCCAGAAATAAATCCTCATAACCAATAAGCCGTTTTTTTTTTTTTTTTTTTTTT  
TTTTTGATACGA

P\_oct\_8\_SE\_15

AATAACAACATAATTTACGAGCATGTTTTGAAGGCGGTCAGTTTTTTTTTTTTTTTTTTTT  
TTTTTGATACGA

P\_oct\_8\_SE\_16

CAGTAATAAAAGACGTGGCACAGACAGGAATAGCCACCACCCTTTTTTTTTTTTTTTTTTT  
TTTTTGATACGA

P\_oct\_8\_SE\_17

GATAGCAGCACCTAGCGTCAGACTGTCATTCAAGCCATTTGGTTTTTTTTTTTTTTTTTTTT

TTTTTGATACGA

P\_oct\_8\_SE\_18

TTATTTTGTACCCCAAAGACAAAAGGACAAAGTACGCAGTATTTTTTTTTTTTTTTTTTTT

TTTTTGATACGA

P\_oct\_8\_SE\_19

ACCCACAAGAATAAGTAAGCAGATAGTTTATCAAATGAAATTTTTTTTTTTTTTTTTTTT

TTTTTGATACGA

P\_oct\_8\_SE\_20

GGCGTTTAGCGTTTTGCACCCAGCTCGTTTTCCACCACCGTTTTTTTTTTTTTTTTTTT

TTTTTGATACGA

P\_oct\_8\_SE\_21

TTACCTTTTTTAAATCGTCGCTATTATTTTCAGGTCGCGCAGATTTTTTTTTTTTTTTTTTTT

TTCTCACTAT

P\_oct\_8\_SE\_22

TACTTCTGAATATAAAGAAATTGCGTTTTGAGGATTTTGCAGTTTTTTTTTTTTTTTTTTT

TTCTCACTAT

P\_oct\_8\_SE\_23

GGTCAGTTGGCACCGTCAATAGATAAACCGGAAAATCGCCATTTTTTTTTTTTTTTTTTTT

TTTCTCACTAT

P\_oct\_8\_SE\_24

TAGTTAATTTACGTTAAATAAGAATATTTTCCTTTTAACTTTTTTTTTTTTTTTTTTTT

TTCTCACTAT

## **P\_oct\_9**

P\_oct\_9\_SE\_1

ATCTTGACAAGAAAGGCTTGCCCTGATACCAAGCAGACGGTCTTTTTTTTTTTTTTTTTTTT

TTTTATAGTGAG

P\_oct\_9\_SE\_2

AACCTAAAACGATTTGACCCCCAGCGGCAGGGACAGAGGCTTTTTTTTTTTTTTTTTTTT

TTTTATAGTGAG

P\_oct\_9\_SE\_3

AGGTAGAAAGATACTAATGCAGATACAAACACCAAGAAGACTGGTTTTTTTTTTTTTTTTTTT

TTTTATAGTGAG

P\_oct\_9\_SE\_4

AACAGCTTGATAATTCGGTCGCTGAGCGCCAAACGAGAGGCTTTTTTTTTTTTTTTTTTTT

TTTTATAGTGAG

P\_oct\_9\_SE\_5

ATTAAGCAATAAAATACTTTTGCGGGAGTTTCATATTTTCATTTTTTTTTTTTTTTTTTTT

TTAAGGTAGA

P\_oct\_9\_SE\_6

CGGATGGCTTAGTAAAGTACGGTGTCTTTCCGTCGGTGCGGTTTTTTTTTTTTTTTTTTT

TTTTTGCTTGAA

P\_oct\_9\_SE\_7

TGGGATAGGTCAAGATCGCACTCCAGCGGTTGAAATAGGAACTTTTTTTTTTTTTTTTTT  
TTTTTGCTTGAA

P\_oct\_9\_SE\_8

AGGTCATTGCCTTGTCATCATATGTGCCTTAGCCGGAGACTTTTTTTTTTTTTTTTTT  
TTTAAGGTAGA

P\_oct\_9\_SE\_9

TTCATTGAATCCTCAGGTCTTACCCTATGGGAATTTTTCATTTTTTTTTTTTTTTTTT  
TTAAGGTAGA

P\_oct\_9\_SE\_10

GCATTCCACAGATAGTAAATGAATTTTGTATGGGGAACAAGATTTTTTTTTTTTTTTTTT  
TTTTTGCTTGAA

P\_oct\_9\_SE\_11

TCACCAGTGAGAAGCAGGCGAAAATCTCGTAATTTAATTGCGTTTTTTTTTTTTTTTTT  
TTTTTGCTTGAA

P\_oct\_9\_SE\_12

CGACGTGTAAACGGGTACCGAGCTCTATTATAGAGCTTCAATTTTTTTTTTTTTTTTTT  
TTTAAGGTAGA

P\_oct\_9\_SE\_13

AAGAGAAGGATTTTGATATAAGTATAGCCAGAACAGTGCCTTTTTTTTTTTTTTTTTT  
TTTAAGGTAGA

P\_oct\_9\_SE\_14

AGCCGCCCCAGAAATAAATCCTCATAACCAATAAGCCGTTTTTTTTTTTTTTTTTTTTT  
TTTTTGCTTGAA

P\_oct\_9\_SE\_15

AATAACAACATAATTTACGAGCATGTTTGAAGGCGGTCAGTTTTTTTTTTTTTTTTTT  
TTTTTGCTTGAA

P\_oct\_9\_SE\_16

CAGTAATAAAAGACGTGGCACAGACAGGAATAGCCACCACCCTTTTTTTTTTTTTTTTTT  
TTTTTAAGGTAGA

P\_oct\_9\_SE\_17

GATAGCAGCACCTAGCGTCAGACTGTCATTCAAGCCATTTGGTTTTTTTTTTTTTTTTTT  
TTTTAAGGTAGA

P\_oct\_9\_SE\_18

TTATTTTGTACCCAAAGACAAAAGGACAAAGTACGCAGTATTTTTTTTTTTTTTTTTTT  
TTTTTGCTTGAA

P\_oct\_9\_SE\_19

ACCCACAAGAATAAGTAAGCAGATAGTTTATCAAATGAAATTTTTTTTTTTTTTTTTTT  
TTTTTGCTTGAA

P\_oct\_9\_SE\_20

GGCGTTTAGCGTTTTGCACCCAGCTCGTTTTCCACCACCGTTTTTTTTTTTTTTTTTT  
TTTTAAGGTAGA

P\_oct\_9\_SE\_21

TTACTTTTTAAATCGTCGCTATTATTTTCAGGTCGCGCAGATTTTTTTTTTTTTTTTTTT  
TTATGTGTGT

P\_oct\_9\_SE\_22

TACTTCTGAATATAAAGAAATTGCGTTTTGAGGATTTTGCGGTTTTTTTTTTTTTTTTTTT  
TTTATGTGTGT

P\_oct\_9\_SE\_23

GGTCAGTTGGCACCGTCAATAGATAAACCGGAAAATCGCCATTTTTTTTTTTTTTTTTTT  
TTTTATGTGTGT

P\_oct\_9\_SE\_24

TAGTTAATTCACGTAAATAAGAATATTTCCTTTTAACCTTTTTTTTTTTTTTTTTTTT  
TTATGTGTGT

**P\_oct\_10**

P\_oct\_10\_SE\_1

ATCTTGACAAGAAAGGCTTGCCCTGATACCAAGCAGACGGTCTTTTTTTTTTTTTTTTTT  
TTTTACACACAT

P\_oct\_10\_SE\_2

AACCTAAAACGATTTGACCCCCAGCGGCAGGGACAGAGGCTTTTTTTTTTTTTTTTTTT  
TTTTTACACACAT

P\_oct\_10\_SE\_3

AACAGCTTGATAATTCGGTCGCTGAGCGCCAAACGAGAGGCTTTTTTTTTTTTTTTTTT  
TTTTTACACACAT

P\_oct\_10\_SE\_4

AGGTAGAAAGATACTAATGCAGATACAAACACCAAGAACTGGTTTTTTTTTTTTTTTTT  
TTTTTACACACAT

P\_oct\_10\_SE\_5

ATTAAGCAATAAAAATACTTTTGCGGGAGTTTCATATTTTCATTTTTTTTTTTTTTTTTT  
TTCAGTCATA

P\_oct\_10\_SE\_6

CGGATGGCTTAGTAAAGTACGGTGTCTTTCCGTCGGTGC GGTTTTTTTTTTTTTTTTTT  
TTTTTGATACGA

P\_oct\_10\_SE\_7

TGGGATAGGTCAAGATCGCACTCCAGCGGTTGAAATAGGAACTTTTTTTTTTTTTTTTTT  
TTTTTGATACGA

P\_oct\_10\_SE\_8

AGGTCATTGCCTTGCAATCATATGTGCCTTAGCCGGAGACTTTTTTTTTTTTTTTTTTT  
TTCAGTCATA

P\_oct\_10\_SE\_9

TTCATTGAATCCTCAGGTCTTACCCTATGGGAATTTTTTCATTTTTTTTTTTTTTTTTT  
TTCAGTCATA

P\_oct\_10\_SE\_10

GCATTCCACAGATAGTAAATGAATTTTTGATGGGGAACAAGATTTTTTTTTTTTTTTTTT  
TTTTTGATACGA

P\_oct\_10\_SE\_11

TCACCAGTGAGAAGCAGGCGAAAATCTCGTAATTTAATTGCGTTTTTTTTTTTTTTTTTT



TTTTTGATACGA

P\_oct\_10\_SE\_12

CGACGTTGTAAACGGGTACCGAGCTCTATTATAGAGCTTCAATTTTTTTTTTTTTTTTTTTT  
TTTCAGTCATA

P\_oct\_10\_SE\_13

AAGAGAAGGATTTTGATATAAGTATAGCCAGAACAGTGCCTTTTTTTTTTTTTTTTTTTT  
TTTCAGTCATA

P\_oct\_10\_SE\_14

AGCCGCGCCAGAAATAAATCCTCATAACCAATAAGCCGTTTTTTTTTTTTTTTTTTTTTT  
TTTTTGATACGA

P\_oct\_10\_SE\_15

AATAACAACATAATTTACGAGCATGTTTTGAAGGCGGTCAGTTTTTTTTTTTTTTTTTTT  
TTTTTGATACGA

P\_oct\_10\_SE\_16

CAGTAATAAAAGACGTGGCACAGACAGGAATAGCCACCACCCTTTTTTTTTTTTTTTTTTT  
TTTTCAGTCATA

P\_oct\_10\_SE\_17

GATAGCAGCACCTAGCGTCAGACTGTCATTCAAGCCATTTGGTTTTTTTTTTTTTTTTTTT  
TTTTCAGTCATA

P\_oct\_10\_SE\_18

TTATTTTGTACCCAAAGACAAAAGGACAAAGTACGCAGTATTTTTTTTTTTTTTTTTTTT  
TTTTTGATACGA

P\_oct\_10\_SE\_19

ACCCACAAGAATAAGTAAGCAGATAGTTTATCAAATGAAATTTTTTTTTTTTTTTTTTTT  
TTTTTGATACGA

P\_oct\_10\_SE\_20

GGCGTTTTAGCGTTTTGCACCCAGCTCGTTTTCCACCACCGGTTTTTTTTTTTTTTTTTTT  
TTTTCAGTCATA

P\_oct\_10\_SE\_21

TTACTTTTTTAAATCGTCGCTATTATTTTCAGGTCGCGCAGATTTTTTTTTTTTTTTTTTTT  
TTCTCACTAT

P\_oct\_10\_SE\_22

TACTTCTGAATATAAAGAAATTGCGTTTTGAGGATTTTGCAGTTTTTTTTTTTTTTTTTTT  
TTTCTCACTAT

P\_oct\_10\_SE\_23

GGTCAGTTGGCACCGTCAATAGATAAACCGGAAAATCGCCATTTTTTTTTTTTTTTTTTTT  
TTTTCTCACTAT

P\_oct\_10\_SE\_24

TAGTTAATTTACGTTAAATAAGAATATTTTCCTTTTAACTTTTTTTTTTTTTTTTTTTT  
TTCTCACTAT

**P\_oct\_11**

P\_oct\_11\_SE\_1

ATCTTGACAAGAAAGGCTTGCCTGATACCAAGCAGACGGTCTTTTTTTTTTTTTTTTTTT  
TTTTGTGTAGAT

P\_oct\_11\_SE\_2

AACCTAAAACGATTTGACCCCCAGCGGCAGGGACAGAGGCTTTTTTTTTTTTTTTTTTT  
TTTTGTGTAGAT

P\_oct\_11\_SE\_3

AGGTAGAAAGATACTAATGCAGATACAAACACCAAGAAGTGGTTTTTTTTTTTTTTTTTT  
TTTTGTGTAGAT

P\_oct\_11\_SE\_4

AACAGCTTGATAATTCGGTCGCTGAGCGCCAAACGAGAGGCTTTTTTTTTTTTTTTTTTT  
TTTTGTGTAGAT

P\_oct\_11\_SE\_5

ATTAAGCAATAAAATACTTTTGCGGGAGTTTCATATTTTCATTTTTTTTTTTTTTTTTTTT  
TTAGAACAAC

P\_oct\_11\_SE\_6

CGGATGGCTTAGTAAAGTACGGTGCCTTCCGTCGGTGCGGTTTTTTTTTTTTTTTTTTTT  
TTTCACTAACT

P\_oct\_11\_SE\_7

TGGGATAGGTCAAGATCGCACTCCAGCGGTTGAAATAGGAACTTTTTTTTTTTTTTTTTTT  
TTTTTGATACGA

P\_oct\_11\_SE\_8

AGGTCATTGCCTTGTCAATCATATGTGCCTTAGCCGGAGACTTTTTTTTTTTTTTTTTTTT  
TTTCAGTCATA

P\_oct\_11\_SE\_9

TTCATTGAATCCTCAGGTCTTACCCTATGGGAATTTTTCATTTTTTTTTTTTTTTTTTTTT  
TTAGAACAAC

P\_oct\_11\_SE\_10

GCATTCCACAGATAGTAAATGAATTTTGTGATGGGGAACAAGATTTTTTTTTTTTTTTTTTT  
TTTCACTAACT

P\_oct\_11\_SE\_11

TCACCAGTGAGAAGCAGGCGAAAATCTCGTAATTTAATTGCGTTTTTTTTTTTTTTTTTTTT  
TTTTTGATACGA

P\_oct\_11\_SE\_12

CGACGTTGTAAACGGGTACCGAGCTCTATTATAGAGCTTCAATTTTTTTTTTTTTTTTTTTT  
TTTCAGTCATA

P\_oct\_11\_SE\_13

AAGAGAAGGATTTTGATATAAGTATAGCCAGAACAGTGCCTTTTTTTTTTTTTTTTTTTTTT  
TTTTAGAACAAC

P\_oct\_11\_SE\_14

AGCCGCCGCCAGAAATAAATCCTCATAACCAATAAGCCGTTTTTTTTTTTTTTTTTTTTTTT  
TTTCACTAACT

P\_oct\_11\_SE\_15

AATAACAACATAATTTACGAGCATGTTTTGAAGGCGGTCAGTTTTTTTTTTTTTTTTTTTTT  
TTTTTGATACGA

P\_oct\_11\_SE\_16

CAGTAATAAAAGACGTGGCACAGACAGGAATAGCCACCACCCTTTTTTTTTTTTTTTTTT  
TTTTTCAGTCATA

P\_oct\_11\_SE\_17

GATAGCAGCACCTAGCGTCAGACTGTCATTCAAGCCATTTGGTTTTTTTTTTTTTTTTT  
TTTTAGAACAAC

P\_oct\_11\_SE\_18

TTATTTTGTACCCCAAAGACAAAAGGACAAAGTACGCAGTATTTTTTTTTTTTTTTTTT  
TTTTCACTAACT

P\_oct\_11\_SE\_19

ACCCACAAGAATAAGTAAGCAGATAGTTTATCAAATGAAATTTTTTTTTTTTTTTTTT  
TTTTTGATACGA

P\_oct\_11\_SE\_20

GGCGTTTTAGCGTTTTGCACCCAGCTCGTTTTCCACCACCGTTTTTTTTTTTTTTTTT  
TTTTCAGTCATA

P\_oct\_11\_SE\_21

TTACCTTTTTTAAATCGTCGCTATTATTTTCAGGTCGCGCAGATTTTTTTTTTTTTTTTTT  
TTCTCACTAT

P\_oct\_11\_SE\_22

TACTTCTGAATATAAAGAAATTGCGTTTTGAGGATTTGCGGTTTTTTTTTTTTTTTTT  
TTTCTCACTAT

P\_oct\_11\_SE\_23

GGTCAGTTGGCACCGTCAATAGATAAACCGGAAAATCGCCATTTTTTTTTTTTTTTTTT  
TTTTCTCACTAT

P\_oct\_11\_SE\_24

TAGTTAATTTACGTTAAATAAGAATATTTTCCTTTTAACTTTTTTTTTTTTTTTTTT  
TTCTCACTAT

## **P\_oct\_12**

P\_oct\_12\_SE\_1

ATCTTGACAAGAAAGGCTTGCCCTGATACCAAGCAGACGGTCTTTTTTTTTTTTTTTTTT  
TTTTGAGAACTA

P\_oct\_12\_SE\_2

AACCTAAAACGATTTGACCCCCAGCGGCAGGGACAGAGGCTTTTTTTTTTTTTTTTTT  
TTTTTATAGTGAG

P\_oct\_12\_SE\_3

AGGTAGAAAGATACTAATGCAGATACAAACACCAAGAAGTGGTTTTTTTTTTTTTTTTT  
TTTTTTTAGGAGT

P\_oct\_12\_SE\_4

AACAGCTTGATAATTCGGTCGCTGAGCGCCAAACGAGAGGCTTTTTTTTTTTTTTTTTT  
TTTTTATCCGTTA

P\_oct\_12\_SE\_5

ATTAAGCAATAAAATACTTTTGCGGGAGTTTCATATTTTCATTTTTTTTTTTTTTTTTT

TTTGCTTGAA  
P\_oct\_12\_SE\_6  
CGGATGGCTTAGTAAAGTACGGTGTCCCTTCCGTCGGTGCGGTTTTTTTTTTTTTTTTTT  
TTTTTGCTTGAA  
P\_oct\_12\_SE\_7  
TGGGATAGGTCAAGATCGCACTCCAGCGGTTGAAATAGGAACTTTTTTTTTTTTTTTTTT  
TTTTTGCTTGAA  
P\_oct\_12\_SE\_8  
AGGTCATTGCCTTGCAATCATATGTGCCTTAGCCGGAGACTTTTTTTTTTTTTTTTTT  
TTTTGCTTGAA  
P\_oct\_12\_SE\_9  
TTCATTGAATCCTCAGGTCTTACCCTATGGGAATTTTTCATTTTTTTTTTTTTTTTTT  
TTTGCTTGAA  
P\_oct\_12\_SE\_10  
GCATTCCACAGATAGTAAATGAATTTTGTATGGGGAACAAGATTTTTTTTTTTTTTTTTT  
TTTTTGCTTGAA  
P\_oct\_12\_SE\_11  
TCACCAGTGAGAAGCAGGCGAAAATCTCGTAATTTAATTGCGTTTTTTTTTTTTTTTTT  
TTTTTGCTTGAA  
P\_oct\_12\_SE\_12  
CGACGTTGTAAACGGGTACCGAGCTCTATTATAGAGCTTCAATTTTTTTTTTTTTTTTTT  
TTTTGCTTGAA  
P\_oct\_12\_SE\_13  
AAGAGAAGGATTTTGATATAAGTATAGCCAGAACAGTGCCTTTTTTTTTTTTTTTTTT  
TTTTTGCTTGAA  
P\_oct\_12\_SE\_14  
AGCCGCCGCAGAAATAAATCCTCATAACCAATAAGCCGTTTTTTTTTTTTTTTTTTTT  
TTTTTGCTTGAA  
P\_oct\_12\_SE\_15  
AATAACAACATAATTTACGAGCATGTTTGAAGGCGGTCAGTTTTTTTTTTTTTTTTTT  
TTTTTGCTTGAA  
P\_oct\_12\_SE\_16  
CAGTAATAAAAGACGTGGCACAGACAGGAATAGCCACCACCCTTTTTTTTTTTTTTTTTT  
TTTTTGCTTGAA  
P\_oct\_12\_SE\_17  
GATAGCAGCACCTAGCGTCAGACTGTCATTCAAGCCATTTGGTTTTTTTTTTTTTTTTTT  
TTTTTGCTTGAA  
P\_oct\_12\_SE\_18  
TTATTTGTACCCAAAGACAAAAGGACAAAGTACGCAGTATTTTTTTTTTTTTTTTTTT  
TTTTTGCTTGAA  
P\_oct\_12\_SE\_19  
ACCCACAAGAATAAGTAAGCAGATAGTTTATCAAATGAAATTTTTTTTTTTTTTTTTTT  
TTTTTGCTTGAA  
P\_oct\_12\_SE\_20

GGCGTTTTAGCGTTTTGCACCCAGCTCGTTTTCCACCACCGTTTTTTTTTTTTTTTTTTT  
TTTTTGCTTGAA  
P\_oct\_12\_SE\_21  
TTACTTTTTTAAATCGTCGCTATTATTTTCAGGTCGCGCAGATTTTTTTTTTTTTTTTTTT  
TTATCTACAC  
P\_oct\_12\_SE\_22  
TACTTCTGAATATAAAGAAATTGCGTTTTGAGGATTTTGCAGTTTTTTTTTTTTTTTTTTT  
TTTCATCAAGT  
P\_oct\_12\_SE\_23  
GGTCAGTTGGCACCGTCAATAGATAAACCGGAAAATCGCCATTTTTTTTTTTTTTTTTTTT  
TTTTATGTGTGT  
P\_oct\_12\_SE\_24  
TAGTTAATTTACGTTAAATAAGAATATTTTCCTTTTAACTTTTTTTTTTTTTTTTTTTTT  
TTCCATACT

**P\_oct\_13**

P\_oct\_13\_SE\_1  
ATCTTGACAAGAAAGGCTTGCCCTGATACCAAGCAGACGGTCTTTTTTTTTTTTTTTTTTT  
TTTTAGTATGGA  
P\_oct\_13\_SE\_2  
AACCTAAAACGATTTGACCCCCAGCGGCAGGGACAGAGGCTTTTTTTTTTTTTTTTTTTTT  
TTTTTACACACAT  
P\_oct\_13\_SE\_3  
AGGTAGAAAGATACTAATGCAGATACAAACACCAAGAACTGGTTTTTTTTTTTTTTTTTTT  
TTTTTGTGTAGAT  
P\_oct\_13\_SE\_4  
AACAGCTTGATAATTCGGTCGCTGAGCGCCAAACGAGAGGCTTTTTTTTTTTTTTTTTTTTT  
TTTTACTTGATG  
P\_oct\_13\_SE\_5  
ATTAAGCAATAAAATACTTTTGCGGGAGTTTCATATTTTCATTTTTTTTTTTTTTTTTTTTT  
TTTGATACGA  
P\_oct\_13\_SE\_6  
CGGATGGCTTAGTAAAGTACGGTGTCTTTCCGTCGGTGCAGTTTTTTTTTTTTTTTTTTTT  
TTTTTGATACGA  
P\_oct\_13\_SE\_7  
TGGGATAGGTCAAGATCGCACTCCAGCGGTTGAAATAGGAACTTTTTTTTTTTTTTTTTTTTT  
TTTTTGATACGA  
P\_oct\_13\_SE\_8  
AGGTCATTGCCTTGTCATCATATGTGCCTTTAGCCGGAGACTTTTTTTTTTTTTTTTTTTTT  
TTTTGATACGA  
P\_oct\_13\_SE\_9  
TTCATTGAATCCTCAGGTCTTTACCCTATGGGAATTTTTTCATTTTTTTTTTTTTTTTTTTTT  
TTTGATACGA

P\_oct\_13\_SE\_10  
GCATTCCACAGATAGTAAATGAATTTTTGATGGGGAACAAGATTTTTTTTTTTTTTTTTTT  
TTTTTGATACGA

P\_oct\_13\_SE\_11  
TCACCAGTGAGAAGCAGGCGAAAATCTCGTAATTTAATTGCGTTTTTTTTTTTTTTTTTT  
TTTTTGATACGA

P\_oct\_13\_SE\_12  
CGACGTTGTAAACGGGTACCGAGCTCTATTATAGAGCTTCAATTTTTTTTTTTTTTTTTTT  
TTTTTGATACGA

P\_oct\_13\_SE\_13  
AAGAGAAGGATTTTGATATAAGTATAGCCAGAACAGTGCCTTTTTTTTTTTTTTTTTTT  
TTTTTGATACGA

P\_oct\_13\_SE\_14  
AGCCGCCGCCAGAAATAAATCCTCATAACCAATAAGCCGTTTTTTTTTTTTTTTTTTTTTT  
TTTTTGATACGA

P\_oct\_13\_SE\_15  
AATAACAACATAATTTACGAGCATGTTTTGAAGGCGGTCAGTTTTTTTTTTTTTTTTTT  
TTTTTGATACGA

P\_oct\_13\_SE\_16  
CAGTAATAAAAGACGTGGCACAGACAGGAATAGCCACCACCCTTTTTTTTTTTTTTTTTTT  
TTTTTTGATACGA

P\_oct\_13\_SE\_17  
GATAGCAGCACCTAGCGTCAGACTGTCATTCAAGCCATTTGGTTTTTTTTTTTTTTTTTT  
TTTTTGATACGA

P\_oct\_13\_SE\_18  
TTATTTTGTACCCAAAGACAAAAGGACAAAGTACGCAGTATTTTTTTTTTTTTTTTTTT  
TTTTTGATACGA

P\_oct\_13\_SE\_19  
ACCCACAAGAATAAGTAAGCAGATAGTTTATCAAATGAAATTTTTTTTTTTTTTTTTTT  
TTTTTGATACGA

P\_oct\_13\_SE\_20  
GGCGTTTAGCGTTTTGCACCCAGCTCGTTTTCCACCACCGTTTTTTTTTTTTTTTTTT  
TTTTTGATACGA

P\_oct\_13\_SE\_21  
TTACCTTTTTTAAATCGTCGCTATTATTCAGGTCGCGCAGATTTTTTTTTTTTTTTTTTT  
TTACTCCTAA

P\_oct\_13\_SE\_22  
TACTTCTGAATATAAAGAAATTGCGTTTTGAGGATTTTGCGGTTTTTTTTTTTTTTTTTT  
TTTTAACGGAT

P\_oct\_13\_SE\_23  
GGTCAGTTGGCACCGTCAATAGATAAACGGAAAATCGCCATTTTTTTTTTTTTTTTTTT  
TTTTCTCACTAT

P\_oct\_13\_SE\_24  
TAGTTAATTCACGTAAATAAGAATATTTTCCTTTTTAACCTTTTTTTTTTTTTTTTTTT

TTTAGTTCTC

**P\_oct\_14**

P\_oct\_14\_SE\_1

ATCTTGACAAGAAAGGCTTGCCCTGATACCAAGCAGACGGTCTTTTTTTTTTTTTTTTTTT  
TTTTGAGAACTA

P\_oct\_14\_SE\_2

AACCTAAAACGATTTGACCCCCAGCGGCAGGGACAGAGGCTTTTTTTTTTTTTTTTTTT  
TTTTTATAGTGAG

P\_oct\_14\_SE\_3

AGGTAGAAAGATACTAATGCAGATACAAACACCAAGAAGTGGTTTTTTTTTTTTTTTTTT  
TTTTTTTAGGAGT

P\_oct\_14\_SE\_4

AACAGCTTGATAATTCGGTCGCTGAGCGCCAAACGAGAGGCTTTTTTTTTTTTTTTTTTT  
TTTTTATCCGTTA

P\_oct\_14\_SE\_5

ATTAAGCAATAAAATACTTTTGCGGGAGTTTCATATTTTCATTTTTTTTTTTTTTTTTTTT  
TTATAGTGAG

P\_oct\_14\_SE\_6

CGGATGGCTTAGTAAAGTACGGTGCCTTCCGTCGGTGCGGTTTTTTTTTTTTTTTTTTTT  
TTTTATCCGTTA

P\_oct\_14\_SE\_7

TGGGATAGGTCAAGATCGCACTCCAGCGGTTGAAATAGGAACTTTTTTTTTTTTTTTTTTT  
TTTTTTAGGAGT

P\_oct\_14\_SE\_8

AGGTCATTGCCTTGTCATCATATGTGCCTTAGCCGGAGACTTTTTTTTTTTTTTTTTTTTT  
TTTGAGAACTA

P\_oct\_14\_SE\_9

TTCATTGAATCCTCAGGTCTTTACCCTATGGGAATTTTTTCATTTTTTTTTTTTTTTTTTTT  
TTTGCTTGAA

P\_oct\_14\_SE\_10

GCATTCCACAGATAGTAAATGAATTTTTGATGGGGAACAAGATTTTTTTTTTTTTTTTTTTT  
TTTTTGCTTGAA

P\_oct\_14\_SE\_11

TCACCAGTGAGAAGCAGGCGAAAATCTCGTAATTTAATTGCGTTTTTTTTTTTTTTTTTTTT  
TTTTTGCTTGAA

P\_oct\_14\_SE\_12

CGACGTTGTAAACGGGTACCGAGCTCTATTATAGAGCTTCAATTTTTTTTTTTTTTTTTTTT  
TTTTGCTTGAA

P\_oct\_14\_SE\_13

AAGAGAAGGATTTTGATATAAGTATAGCCAGAACAGTGCCTTTTTTTTTTTTTTTTTTTTT  
TTTTTTAGGAGT

P\_oct\_14\_SE\_14





P\_oct\_15\_SE\_4

AACAGCTTGATAAATTCGGTCGCTGAGCGCCAAACGAGAGGCTTTTTTTTTTTTTTTTTT  
TTTTTTAACGGAT

P\_oct\_15\_SE\_5

ATTAAGCAATAAAATACTTTTGCGGGAGTTTCATATTTTCATTTTTTTTTTTTTTTTTT  
TTACTCCTAA

P\_oct\_15\_SE\_6

CGGATGGCTTAGTAAAGTACGGTGTCTTTCCGTCGGTGCGGTTTTTTTTTTTTTTTTT  
TTTTTAACGGAT

P\_oct\_15\_SE\_7

TGGGATAGGTCAAGATCGCACTCCAGCGGTTGAAATAGGAACTTTTTTTTTTTTTTTTTT  
TTTTCTCACTAT

P\_oct\_15\_SE\_8

AGGTCATTGCCTTGTCATCATATGTGCCTTAGCCGGAGACTTTTTTTTTTTTTTTTTT  
TTTTAGTTCTC

P\_oct\_15\_SE\_9

TTCATTGAATCCTCAGGTCTTACCCTATGGGAATTTTTCATTTTTTTTTTTTTTTTTT  
TTTGATACGA

P\_oct\_15\_SE\_10

GCATTCCACAGATAGTAAATGAATTTTGTATGGGGAACAAGATTTTTTTTTTTTTTTTTT  
TTTTTGATACGA

P\_oct\_15\_SE\_11

TCACCAGTGAGAAGCAGGCGAAAATCTCGTAATTTAATTGCGTTTTTTTTTTTTTTTTT  
TTTTTGATACGA

P\_oct\_15\_SE\_12

CGACGTTGTAAACGGGTACCGAGCTCTATTATAGAGCTTCAATTTTTTTTTTTTTTTTTT  
TTTTTGATACGA

P\_oct\_15\_SE\_13

AAGAGAAGGATTTTGTATATAAGTATAGCCAGAACAGTGCCTTTTTTTTTTTTTTTTTT  
TTTTCTCACTAT

P\_oct\_15\_SE\_14

AGCCGCCGCCAGAAATAAATCCTCATAACCAATAAGCCGTTTTTTTTTTTTTTTTTTTT  
TTTTTAGTTCTC

P\_oct\_15\_SE\_15

AATAACAACATAATTTACGAGCATGTTTGAAGGCGGTCAGTTTTTTTTTTTTTTTTTT  
TTTTACTCCTAA

P\_oct\_15\_SE\_16

CAGTAATAAAAGACGTGGCACAGACAGGAATAGCCACCACCCTTTTTTTTTTTTTTTTTT  
TTTTTTAACGGAT

P\_oct\_15\_SE\_17

GATAGCAGCACCTAGCGTCAGACTGTCAATCAAGCCATTTGGTTTTTTTTTTTTTTTTT  
TTTTCAGTCATA

P\_oct\_15\_SE\_18

TTATTTTGTACCCAAAGACAAAAGGACAAAGTACGCAGTATTTTTTTTTTTTTTTTTT

TTTTCAGTCATA

P\_oct\_15\_SE\_19

ACCCACAAGAATAAGTAAGCAGATAGTTTTATCAAATGAAATTTTTTTTTTTTTTTTTT

TTTTCAGTCATA

P\_oct\_15\_SE\_20

GGCGTTTTAGCGTTTTGCACCCAGCTCGTTTTCCACCACCGTTTTTTTTTTTTTTTTT

TTTTCAGTCATA

P\_oct\_15\_SE\_21

TTACCTTTTTTAAATCGTCGCTATTATTTTCAGGTCGCGCAGATTTTTTTTTTTTTTTTTT

TTACTCCTAA

P\_oct\_15\_SE\_22

TACTTCTGAATATAAAGAAATTGCGTTTTGAGGATTTTGCGGTTTTTTTTTTTTTTTTT

TTTTAACGGAT

P\_oct\_15\_SE\_23

GGTCAGTTGGCACCGTCAATAGATAAACCGGAAAATCGCCATTTTTTTTTTTTTTTTTT

TTTTCTCACTAT

P\_oct\_15\_SE\_24

TAGTTAATTTACGTTAAATAAGAATATTTTCCTTTTAAACCTTTTTTTTTTTTTTTTTT

TTTAGTTCTC

**h. Modified DNA sequence attached on gold nanoparticles**

5'-GAAGTGATGGATGAT-SH-3'

## II. Supplementary Figures

| Names of DOFs                          | Simplified models                                                                   | Actual models                                                                       | View 1                                                                              | View 2                                                                               | View 3                                                                                |
|----------------------------------------|-------------------------------------------------------------------------------------|-------------------------------------------------------------------------------------|-------------------------------------------------------------------------------------|--------------------------------------------------------------------------------------|---------------------------------------------------------------------------------------|
| Regular Octahedron (R_oct)             |    |    |    |    |    |
| Elongated Octahedron (E_oct)           |    |    |    |    |    |
| Partially Elongated Octahedron (P_oct) |   |   |   |   |   |
| Viewing angles                         |  |  |  |  |  |

**Figure S1. Schematic illustration of DNA Origami frames (DOFs).** From top to bottom are regular octahedron (R\_oct), elongated octahedron (E\_oct) and partially elongated octahedron (P\_oct) in sequence. From left to right are names of DOFs, simplified models (shown as single-helix bundles), actual models (shown as six-helix bundles) and views of DOFs from three different viewing angles.

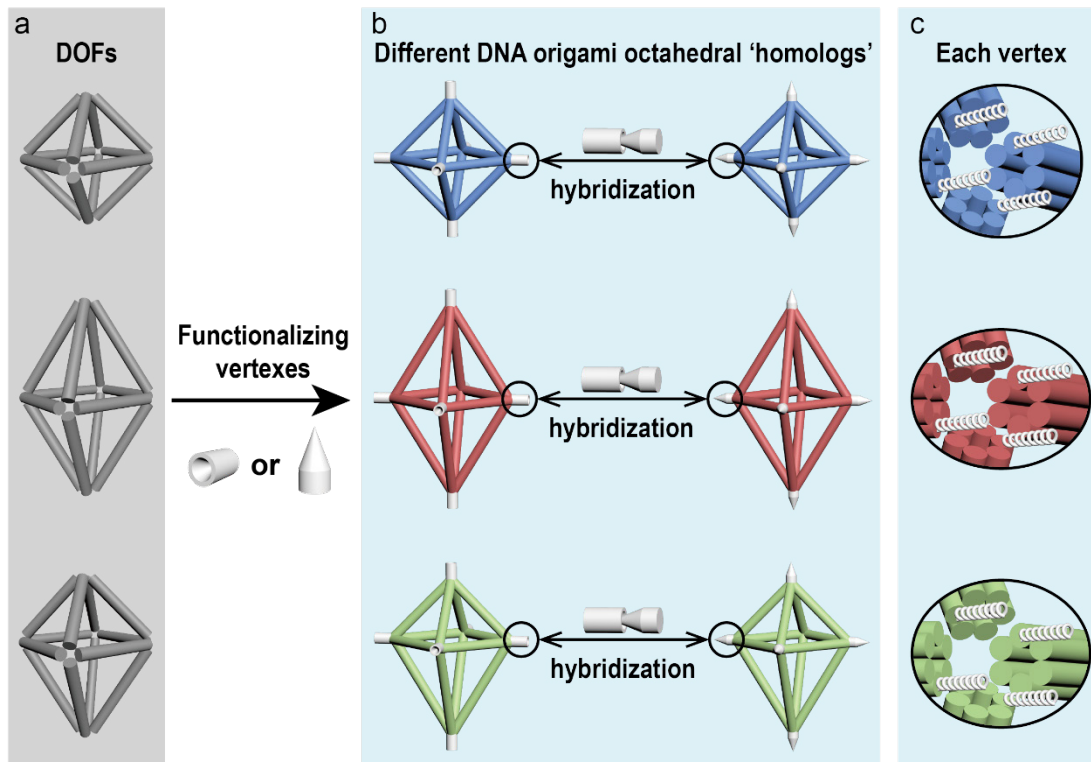

**Figure S2. Schematic diagram of the transformation from DOF monomers to different DNA origami octahedral 'homologs'.** (a) Simplified models of R<sub>oct</sub>, E<sub>oct</sub> and P<sub>oct</sub> DOF monomers. (b) Encoding sticky ends (SEs; indicated by white cylinders and cones) at vertexes of DOFs to form different DNA origami octahedral 'homologs', where SEs are indicated by the cylinders and cones which can hybridize with each other when possessing the same color. (c) Corresponding detailed diagrams of each vertex of DNA origami octahedral 'homologs'.

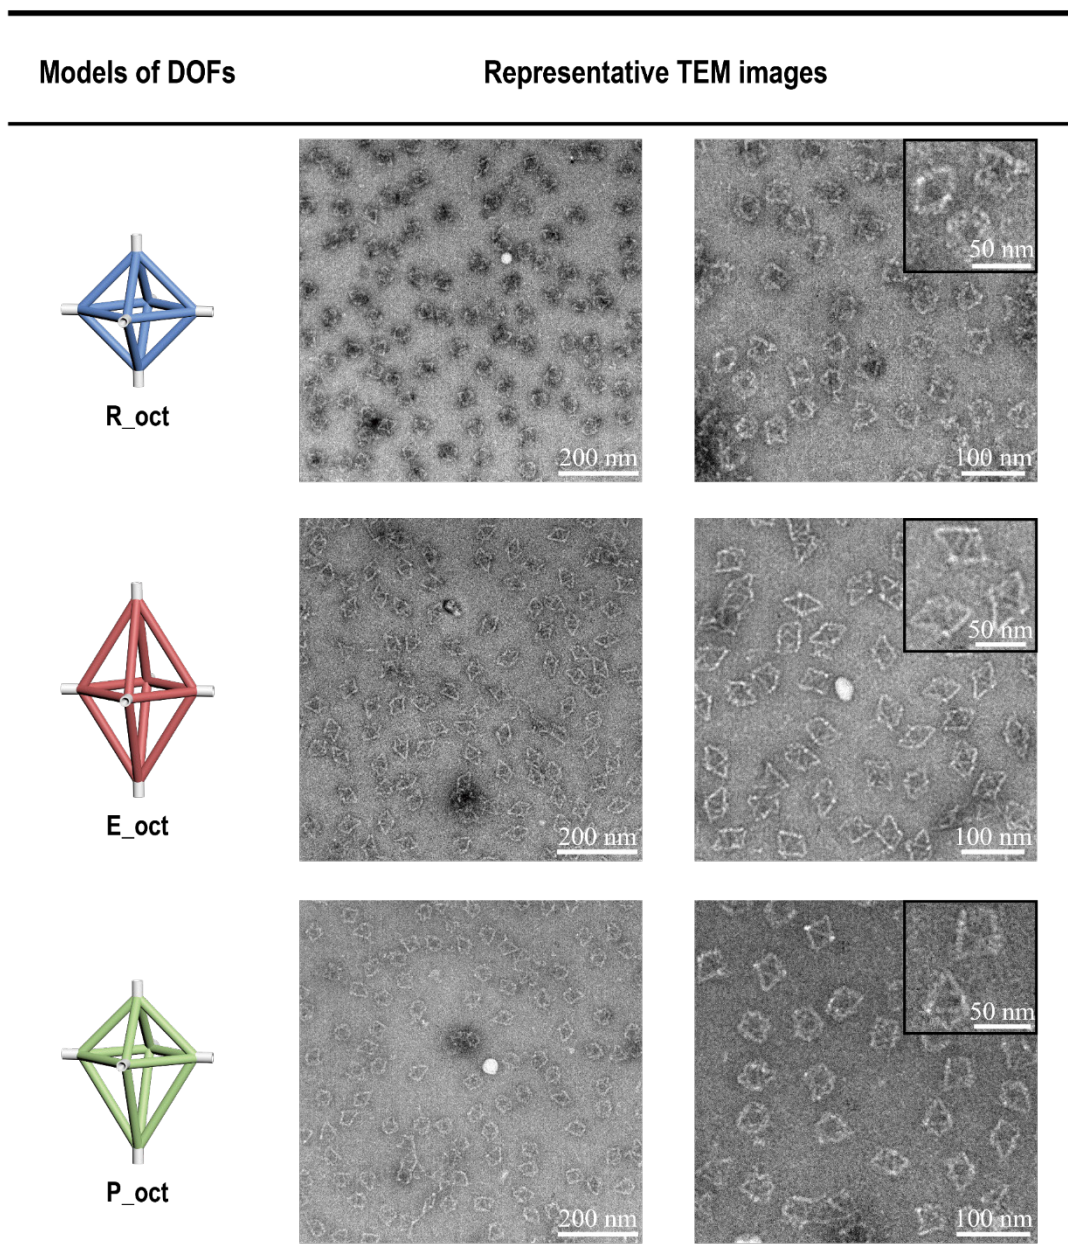

**Figure S3. Representative transmission electron microscopy (TEM) images of the three types of DOFs encoded with SEs.** Models of DOFs encoded with SEs (the first column) with corresponding lower magnification TEM images (the second column) and higher magnification TEM images (the third column). Scale bars, 200 nm (lower), 100 nm and 50 nm (higher).

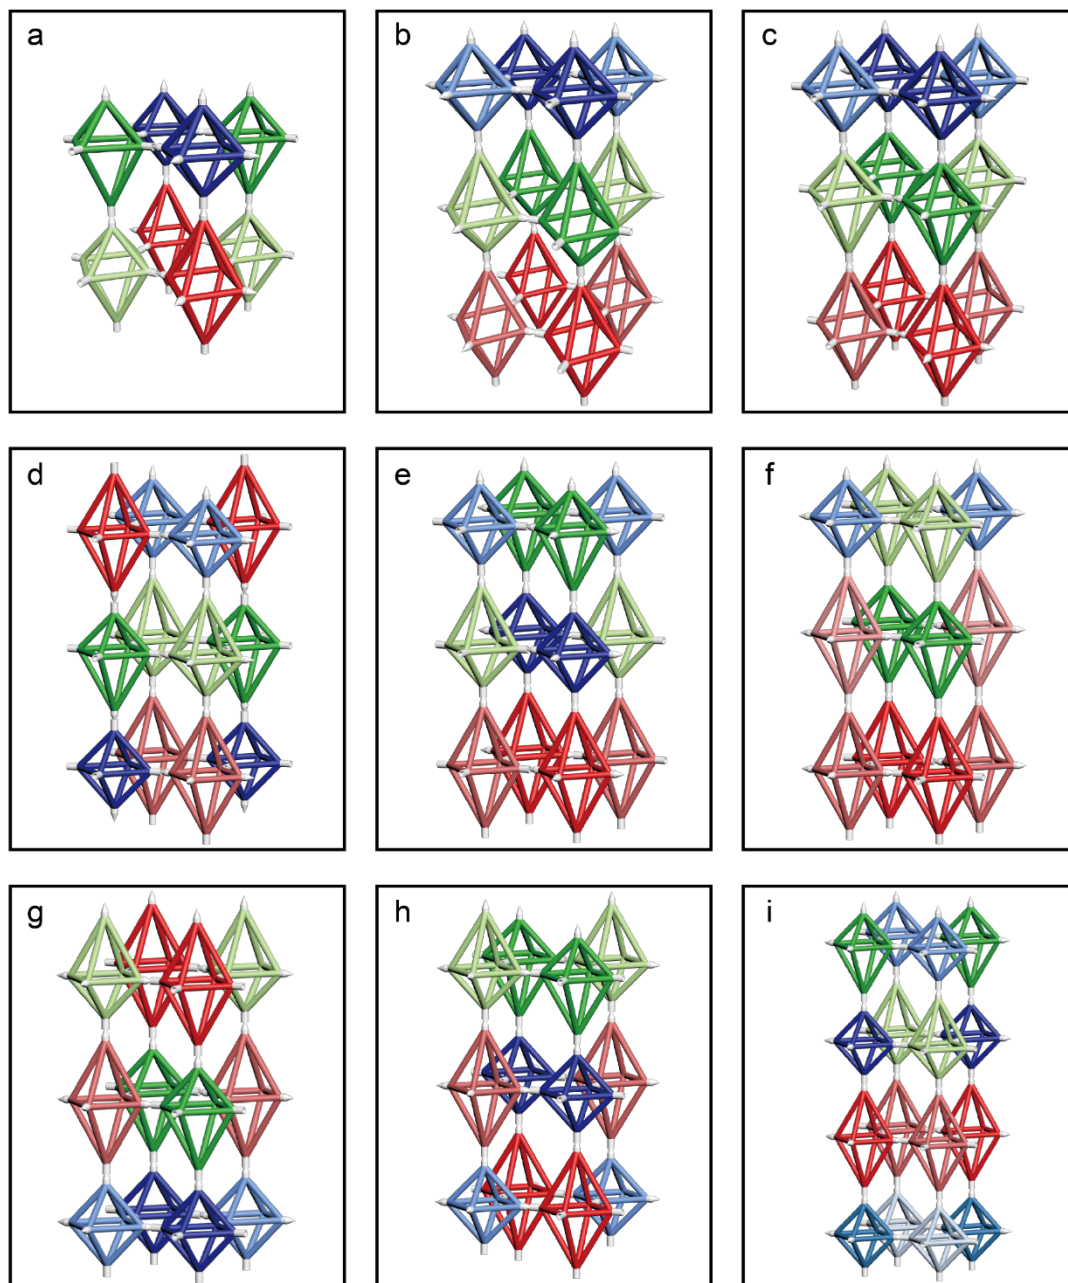

**Figure S4. Examples of various different DOF platforms assembled by  $R_{oct}$ ,  $E_{oct}$  and  $P_{oct}$  DOFs.** Taking advantage of the structural complementarity of the three types of DOFs and the specificity of SEs installed at vertexes, diverse DOF platforms containing different numbers of DNA origami octahedral ‘homologs’ can be realized, such as four ‘homologs’ (a), six ‘homologs’ (b to h) and eight ‘homologs’ (i). The DOF platforms shown in (a to c) are achieved in this work, which are termed  $M_1$ ,  $M_2$  and  $M_3$  platforms respectively.



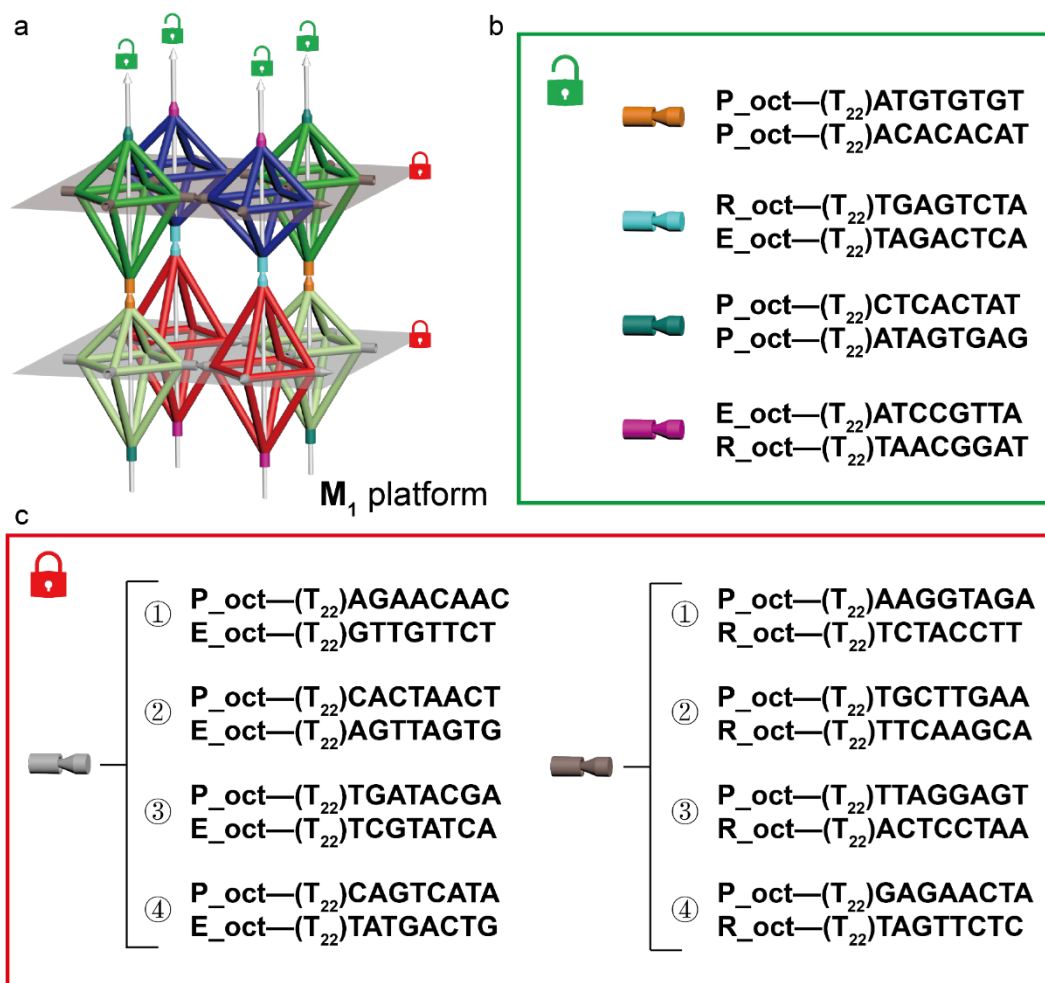

**Figure S5. M<sub>1</sub> platform constructed by applying ‘unlocked mode’ and ‘locked mode’ along the vertical and horizontal directions, respectively.** (a) Enlarged model of M<sub>1</sub> platform. (b) Detailed sequences of SEs used in the ‘unlocked mode’. (c) Detailed sequences of SEs used in the ‘locked mode’.

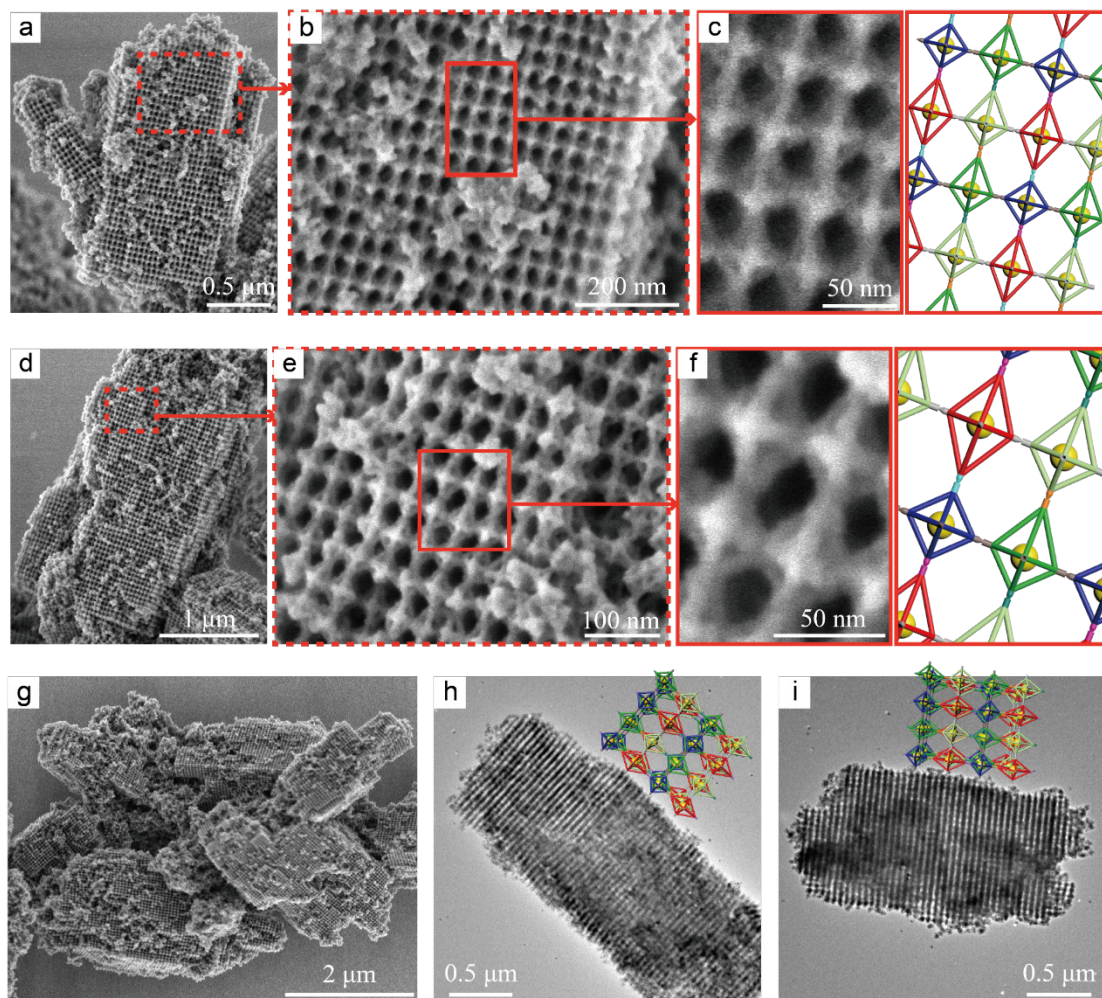

**Figure S6. Representative scanning electron microscopy (SEM) and TEM images of superlattice  $M_1_4Au$  after coated with a thin layer of silica.** (a) SEM image of superlattice  $M_1_4Au$ . Scale bar,  $0.5 \mu m$ . (b) Close-up view of the region framed in the red dotted box in Figure S6a. Scale bar,  $200 nm$ . (c) Close-up view of the region framed in the red box in Figure S6b with corresponding model shown beside. Scale bar,  $50 nm$ . (d) Another SEM image of superlattice  $M_1_4Au$ . Scale bar,  $1 \mu m$ . (e) Close-up view of the region framed in the red dotted box in Figure S6d. Scale bar,  $100 nm$ . (f) Close-up view of the region framed in the red box in Figure S6e with corresponding model shown beside. Scale bar,  $50 nm$ . (g) Large-scaled SEM image of superlattice  $M_1_4Au$ . Scale bar,  $2 \mu m$ . (h, i) TEM images of superlattice  $M_1_4Au$  with corresponding models shown beside. Scale bars,  $0.5 \mu m$ .



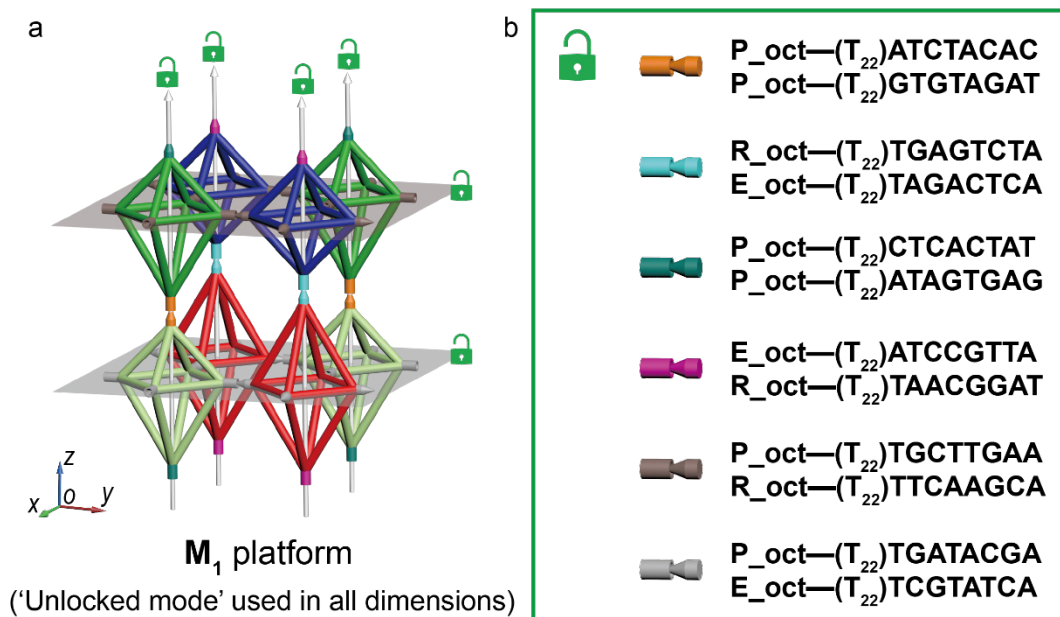

**Figure S7. M<sub>1</sub> platform constructed by applying ‘unlocked mode’ in all dimensions.**

(a) Different from the SE design in Fig. S5, M<sub>1</sub> platform here is constructed by applying ‘unlocked mode’ in all dimensions. (b) Detailed sequences of SEs used in the ‘unlocked mode’.

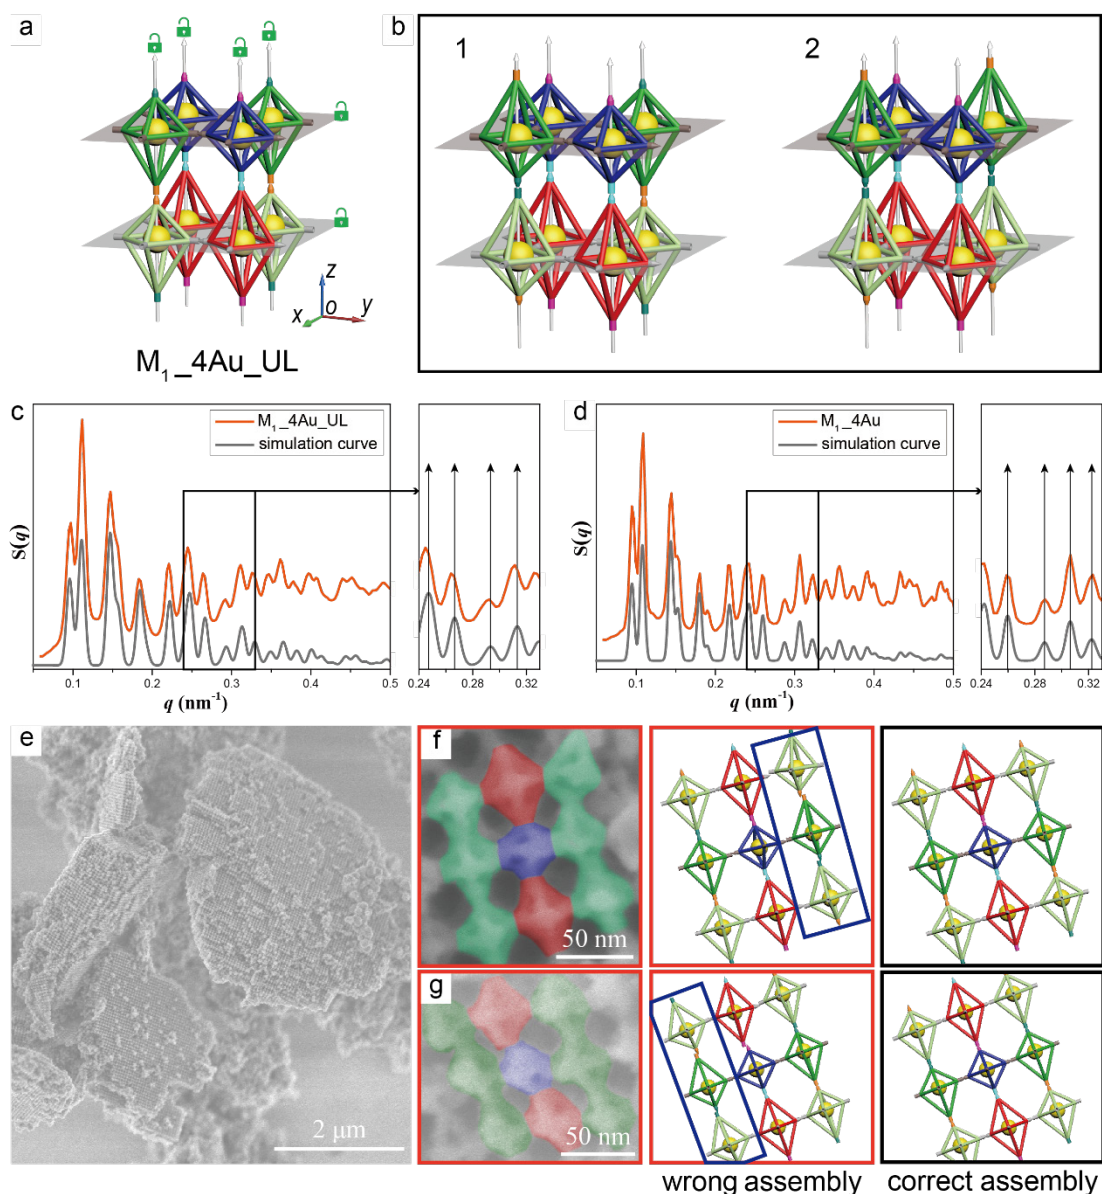

**Figure S8. Nanoparticle superlattice  $M_1_4Au\_UL$  which was assembled by applying ‘unlocked mode’ in all dimensions.** (a) Simple model of nanoparticle superlattice  $M_1_4Au\_UL$ . (b) Two possible packing modes under the ‘unlocked mode’. (c) Experimental SAXS result (orange) of  $M_1_4Au\_UL$  and the simulation curve (grey). As the value of  $q$  increases, the peak positions of the experimental scattering peaks slightly shift. The region in the black box is magnified on the right for a clearer view. (d) Experimental SAXS result (orange) of  $M_1_4Au$  and the simulation curve (grey). The experimental result matches well with the simulation. (e) SEM image of the nanoparticle superlattice  $M_1_4Au\_UL$  at low magnification. Scale bar,  $2\ \mu m$ . (f and g) From left to the right: SEM images of the nanoparticle superlattice  $M_1_4Au\_UL$  at high

magnification; corresponding model framed in the red box with the incorrect assembly parts framed in blue boxes; corresponding correct assembly model framed in the black box. For clear observation, R<sub>oct</sub>, E<sub>oct</sub> and P<sub>oct</sub> 'homologs' are falsely colored in blue, red and green, respectively. Scale bars, 50 nm.

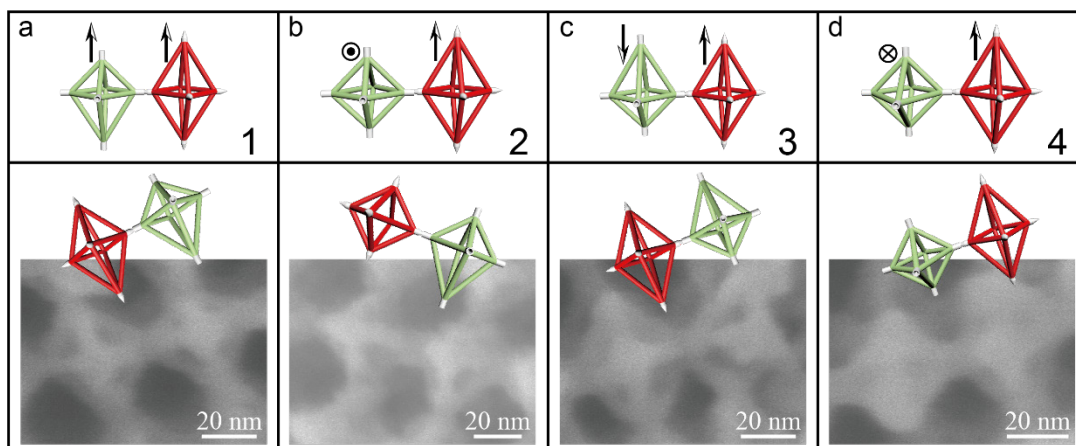

**Figure S9. Four different binding modes (numbered from 1 to 4) between  $E_{oct}$  and  $P_{oct}$  found in the nanoparticle superlattice  $M1_4Au_{UL}$ , of which three types are unnecessary (2 to 4).** From left to right, each panel contains the standard model of the binding mode (up) and corresponding experimental results with actual model shown beside (bottom). Scale bars, 20 nm.

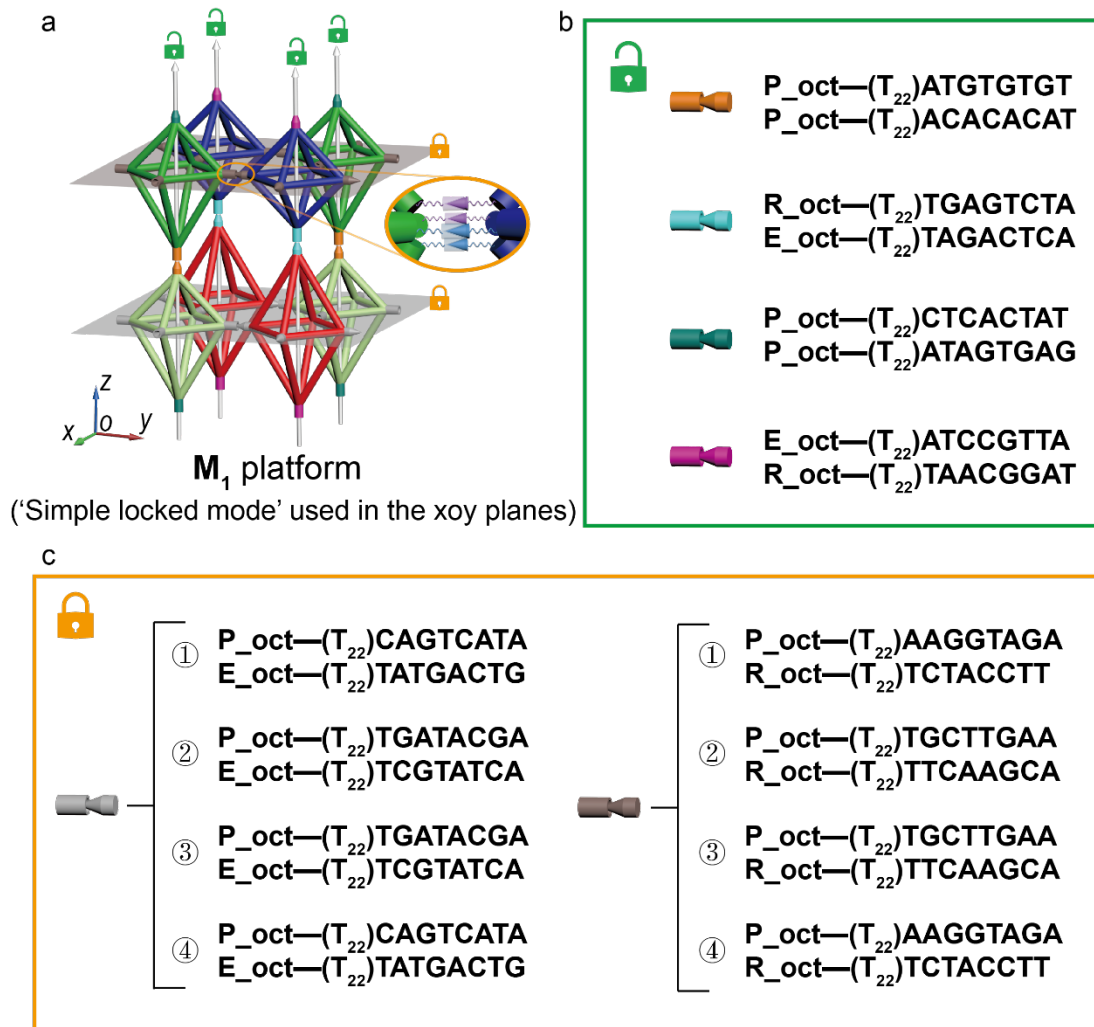

**Figure S10.** M<sub>1</sub> platform constructed by applying ‘unlocked mode’ and ‘simple locked mode’ along the z-axis and in the xoy plane, respectively. (a) Different from the SE design in Fig. S5, M<sub>1</sub> platform here is constructed by applying ‘simple locked mode’ (orange closed lock) in the xoy plane. The ‘simple locked mode’ (orange closed lock) means only two kinds of SEs are stretched out from the vertex in a specific arrangement (framed in the orange ellipse). (b) Detailed sequences of SEs used in the ‘unlocked mode’ along the z-axis. (c) Detailed sequences of SEs used in the ‘simple locked mode’ in the xoy plane.

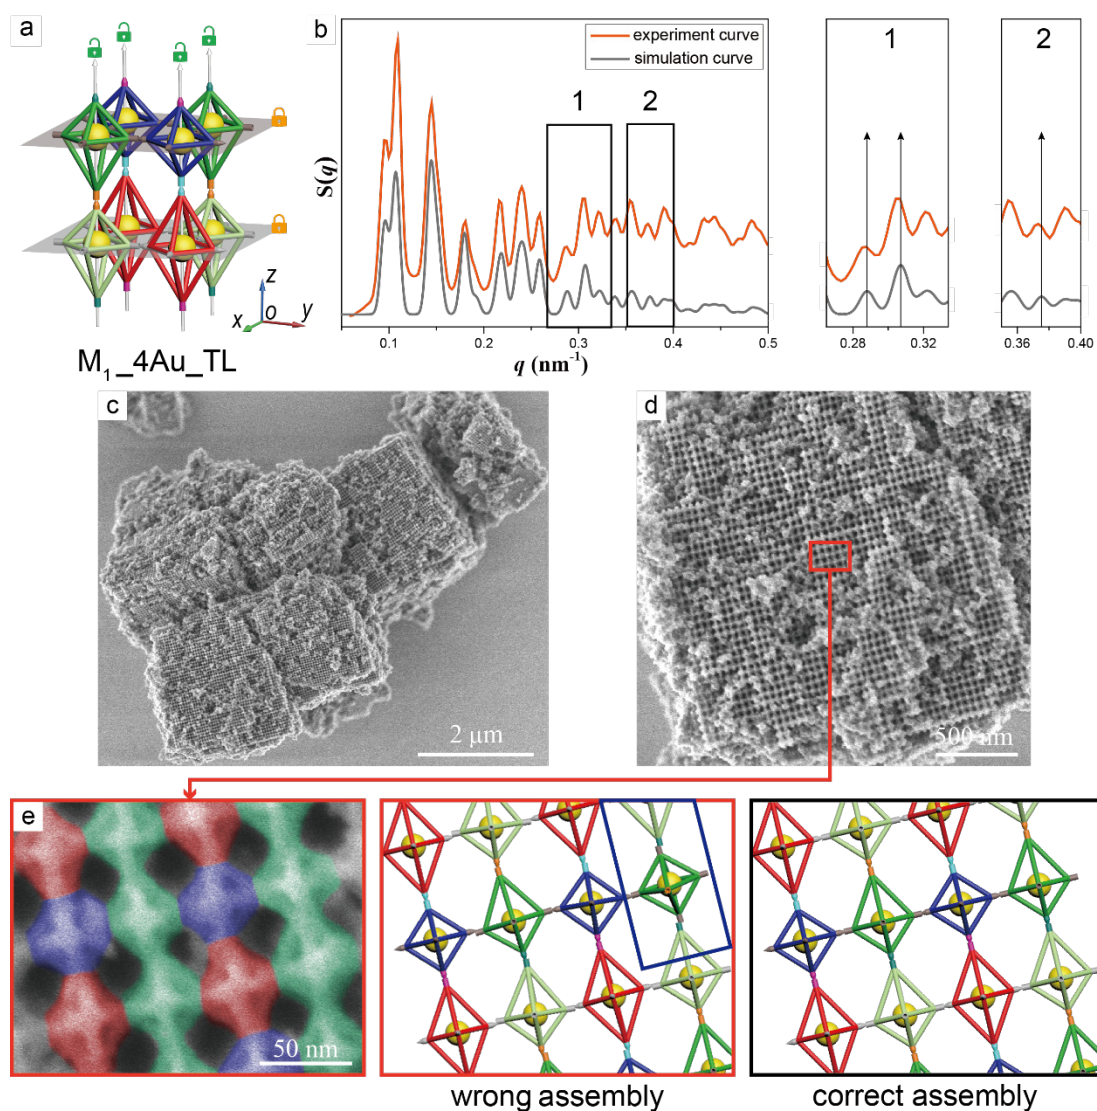

**Figure S11. Nanoparticle superlattice  $M_1\_4Au\_TL$  which was assembled by applying ‘unlocked mode’ and ‘simple locked mode’ (see Fig. S10 for details) along the z-axis and in the xoy plane, respectively.** (a) Simple model of nanoparticle superlattice  $M_1\_4Au\_TL$ . (b) Experimental SAXS result (orange) of  $M_1\_4Au\_TL$  and the simulation curve (grey). The peaks framed in black boxes exhibit very slightly deviation with the simulated curve. (c) SEM image of the nanoparticle superlattice  $M_1\_4Au\_TL$  at low magnification. Scale bar, 2  $\mu m$ . (d) SEM image of the nanoparticle superlattice  $M_1\_4Au\_TL$  at high magnification. Scale bar, 500 nm. (e) From left to the right: close-up view of the region framed in the red box in Figure S11d; corresponding model framed in the red box with the incorrect assembly parts framed in the blue box; corresponding correct assembly model framed in the black box. For clear observation,  $R\_oct$ ,  $E\_oct$  and  $P\_oct$  ‘homologs’ are falsely colored in blue, red and green,



respectively. Scale bar, 50 nm.

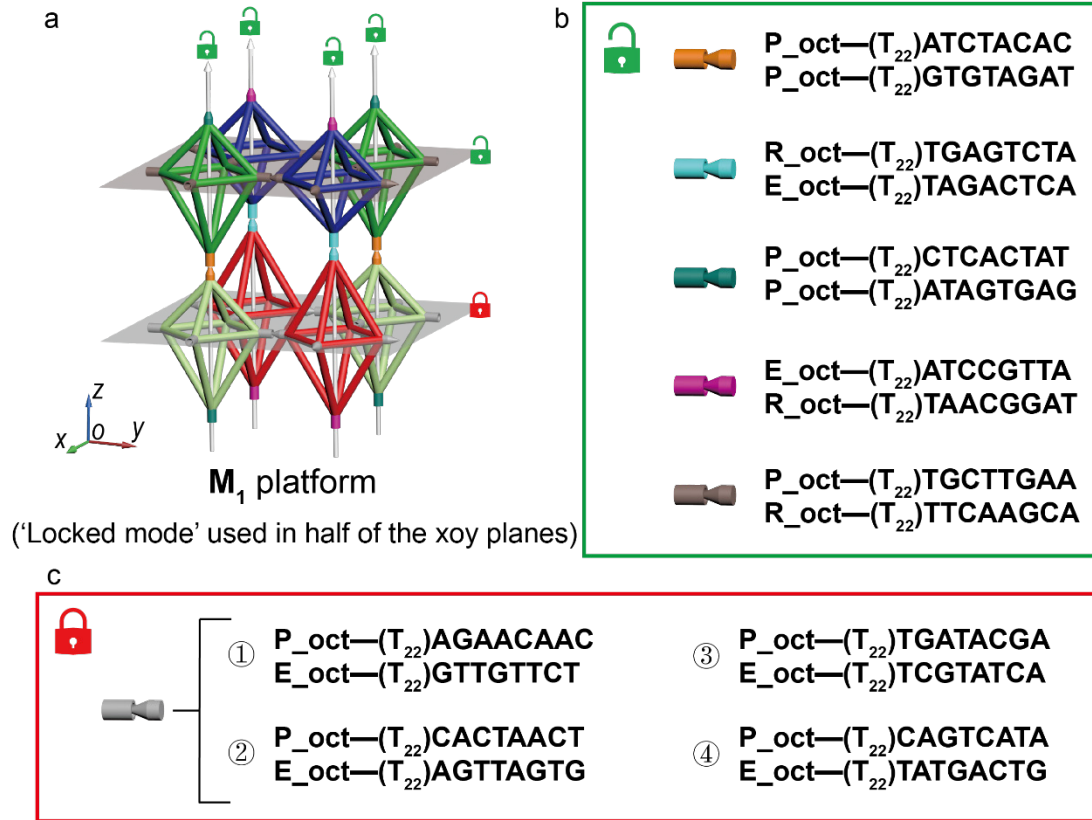

**Figure S12. M<sub>1</sub> platform constructed by applying 'unlocked mode' along the z-axis and in half of the xoy planes, and applying 'locked mode' in the other half of the xoy planes.** (a) Different from the SE design in Fig. S5, M<sub>1</sub> platform here is constructed by applying 'locked mode' in half of the xoy planes. (b) Detailed sequences of SEs used in the 'unlocked mode'. (c) Detailed sequences of SEs used in the 'locked mode'.

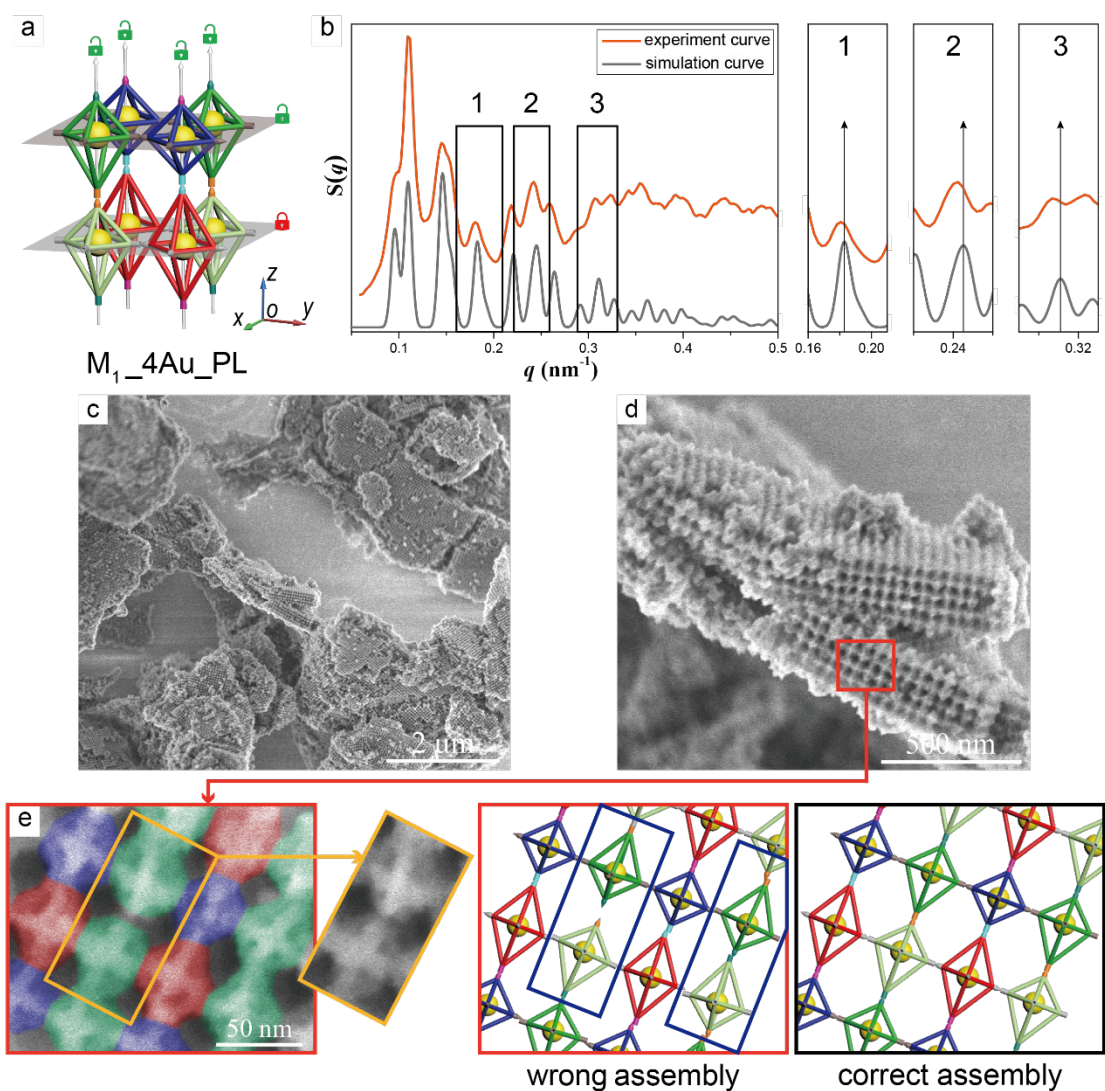

**Figure S13. Nanoparticle superlattice  $M_1_4Au\_PL$  which was assembled by applying ‘locked mode’ in half of the  $xoy$  planes.** (a) Simple model of nanoparticle superlattice  $M_1_4Au\_PL$ . (b) Experimental SAXS result (orange) of  $M_1_4Au\_PL$  and the simulation curve (grey). The peaks framed in black boxes exhibit obvious deviation with the simulated curve. (c) SEM image of the nanoparticle superlattice  $M_1_4Au\_PL$  at low magnification. Scale bar, 2  $\mu m$ . (d) SEM image of the nanoparticle superlattice  $M_1_4Au\_PL$  at high magnification. Scale bar, 500 nm. (e) From left to the right: close-up view of the region framed in the red box in Figure S13d; raw SEM image of the region framed in the orange box showing two unconnected monomers; corresponding model framed in the red box with the incorrect assembly parts framed in blue boxes; corresponding correct assembly model framed in the black box. For clear observation,  $R_{oct}$ ,  $E_{oct}$  and  $P_{oct}$  ‘homologs’ are falsely colored in blue, red and green,



respectively. Scale bar, 50 nm.

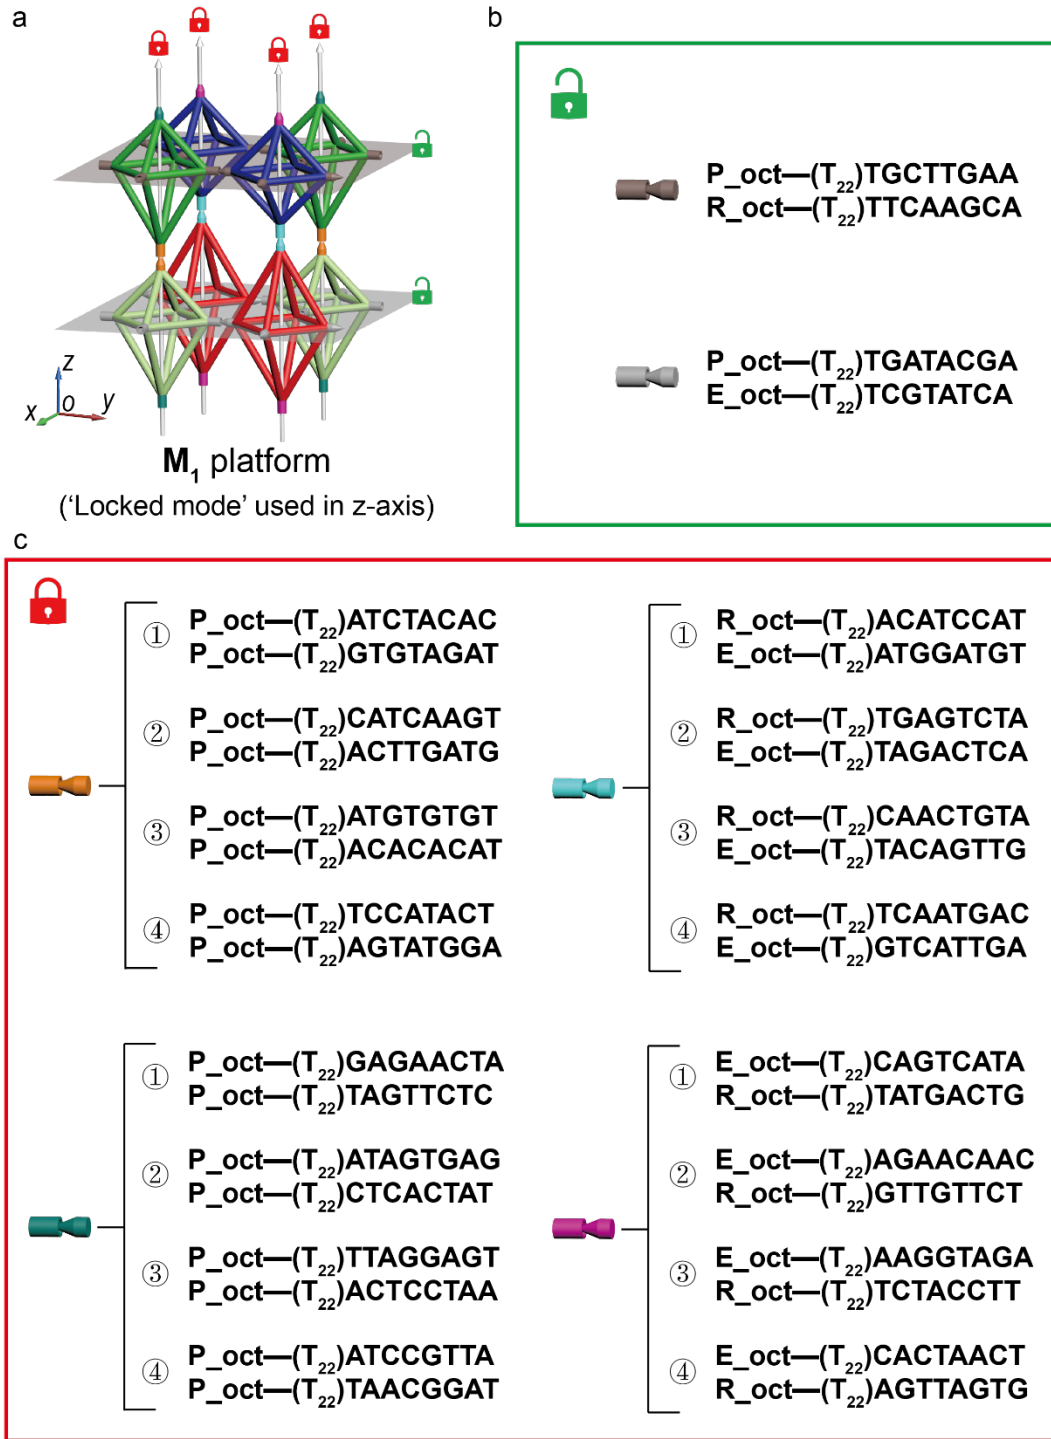

**Figure S14.** M<sub>1</sub> platform constructed by applying ‘unlocked mode’ and ‘locked mode’ in the xoy plane and along the z-axis, respectively. (a) Different from the SE design in Fig. S5, M<sub>1</sub> platform here is constructed by applying ‘unlocked mode’ and ‘locked mode’ in the xoy plane and along the z-axis, respectively. (b) Detailed sequences of SEs used in the ‘unlocked mode’. (c) Detailed sequences of SEs used in

the ‘locked mode’.

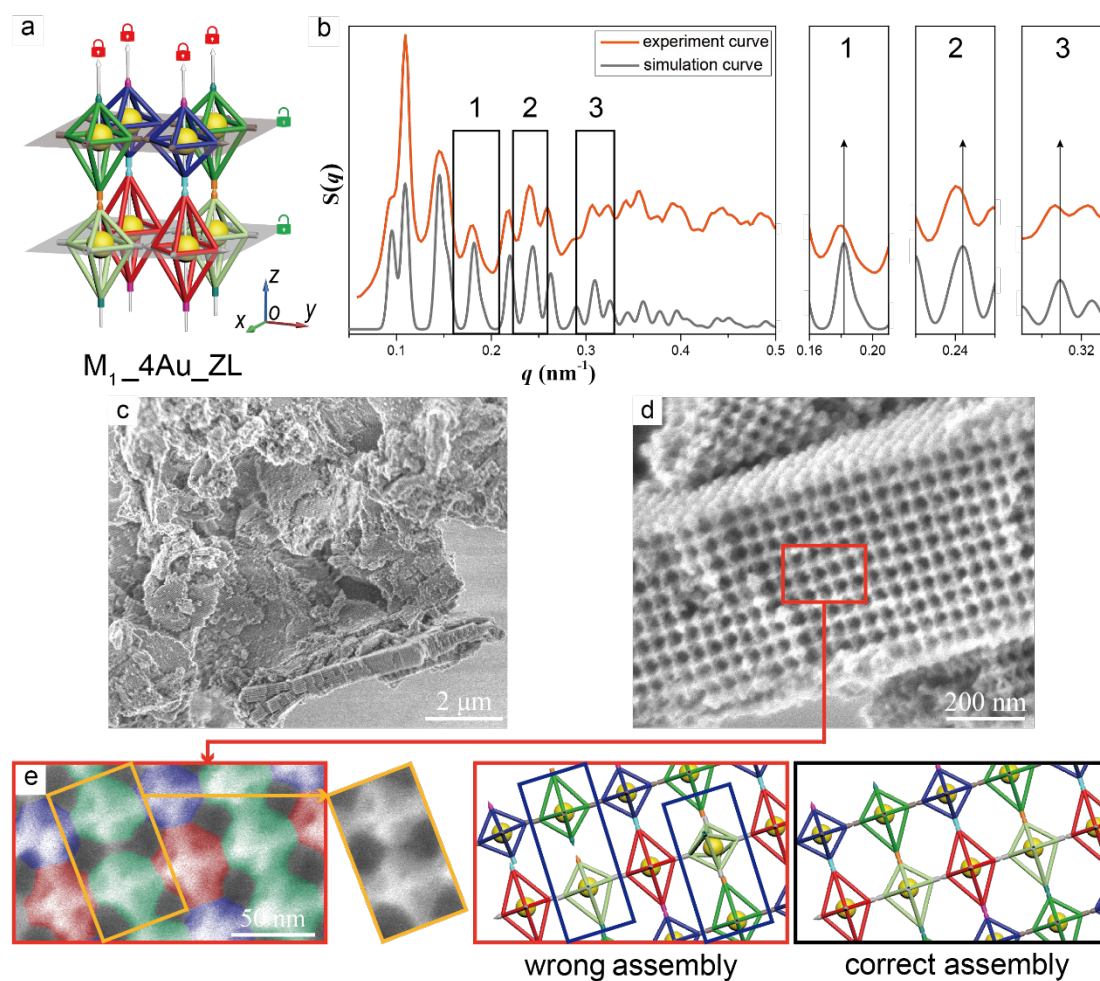

**Figure S15. Nanoparticle superlattice  $M_1_4Au\_ZL$  which was assembled by applying ‘unlocked mode’ and ‘locked mode’ in the xoy plane and along the z-axis, respectively.** (a) Simple model of nanoparticle superlattice  $M_1_4Au\_ZL$ . (b) Experimental SAXS result (orange) of  $M_1_4Au\_ZL$  and the simulation curve (grey). The peaks framed in black boxes exhibit obvious deviation with the simulated curve. (c) SEM image of the nanoparticle superlattice  $M_1_4Au\_ZL$  at low magnification. Scale bar, 2  $\mu m$ . (d) SEM image of the nanoparticle superlattice  $M_1_4Au\_ZL$  at high magnification. Scale bar, 200 nm. (e) From left to the right: close-up view of the region framed in the red box in Figure S15d; raw SEM image of the region framed in the orange box showing two unconnected monomers; corresponding model framed in the red box with the incorrect assembly parts framed in blue boxes; corresponding correct assembly model framed in the black box. For clear observation,  $R\_oct$ ,  $E\_oct$  and  $P\_oct$  ‘homologs’ are falsely colored in blue, red and green, respectively. Scale bar, 50 nm.

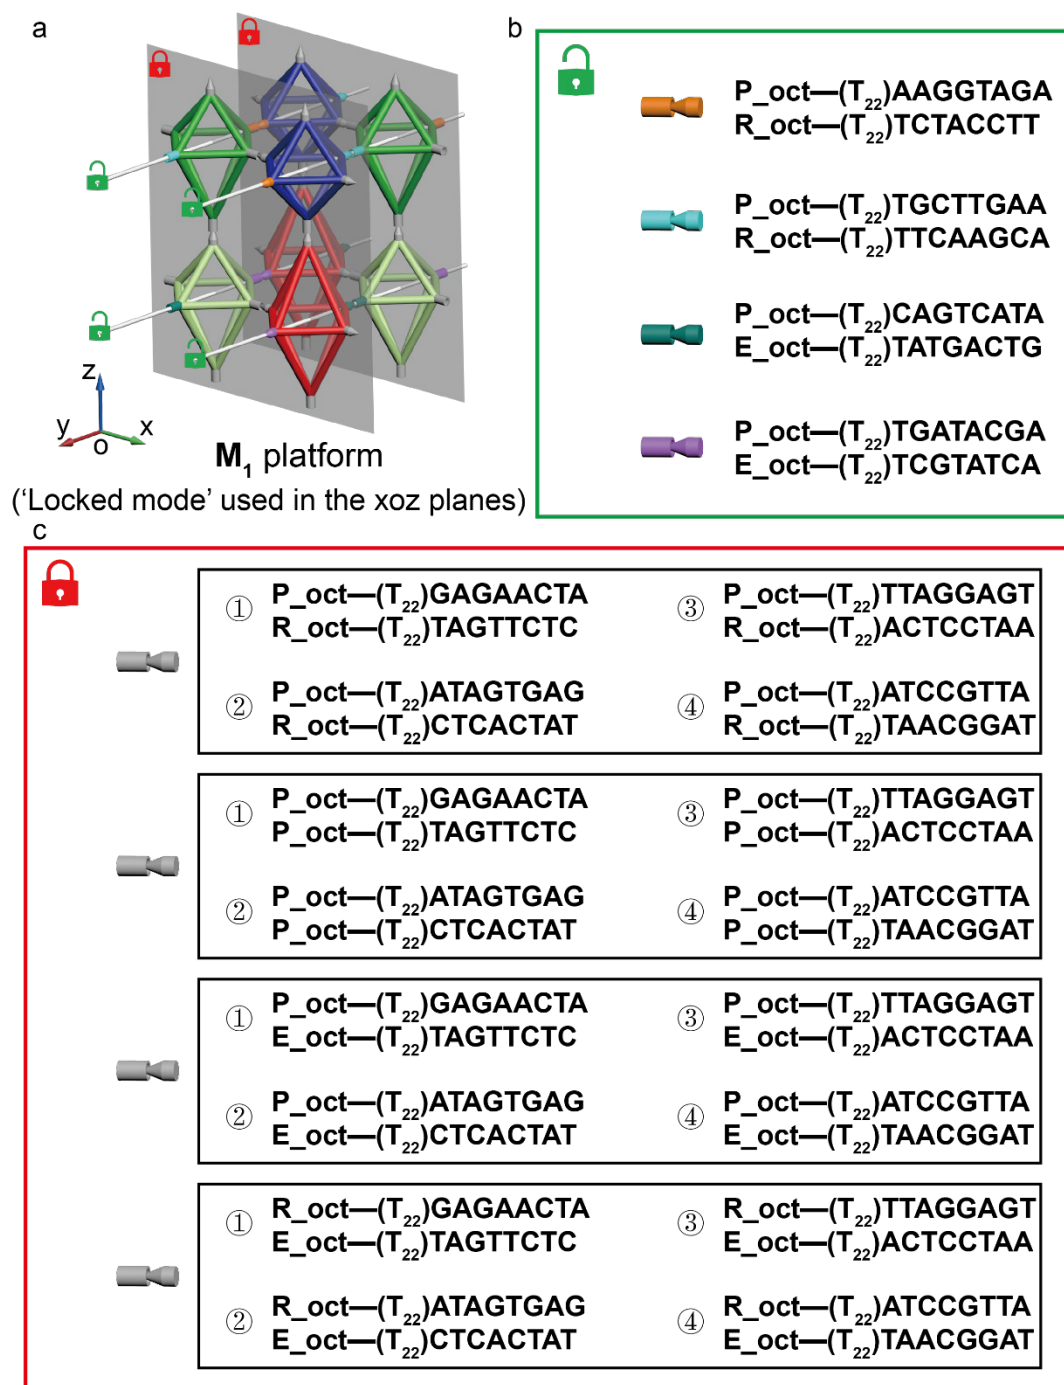

**Figure S16.** M<sub>1</sub> platform constructed by applying ‘unlocked mode’ and ‘locked mode’ along the y-axis and in the xoz plane, respectively. (a) Different from the SE design in Fig. S5, M<sub>1</sub> platform here is constructed by applying the ‘unlocked mode’ along the y-axis and the ‘locked mode’ in the xoz plane. (b) Detailed sequences of SEs used in the ‘unlocked mode’. (c) Detailed sequences of SEs used in the ‘locked mode’.

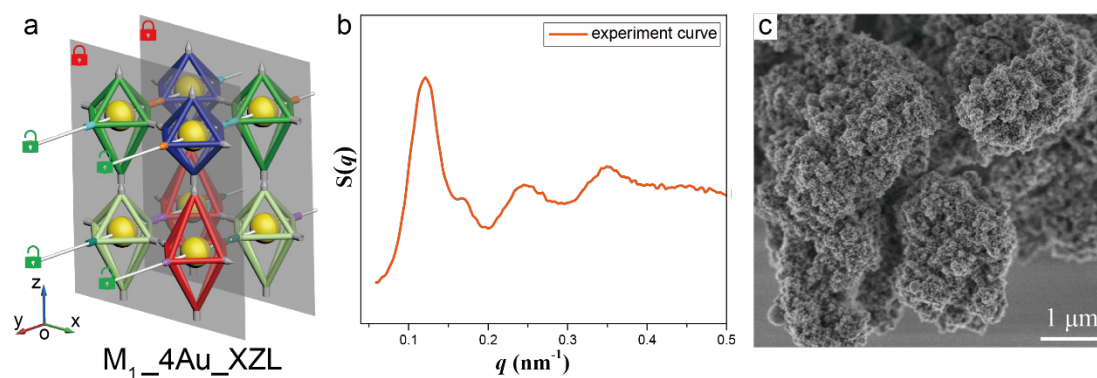

**Figure S17. Nanoparticle superlattice  $M_1_4Au\_XZL$  which was assembled by applying the ‘unlocked mode’ in the y-axis and the ‘locked mode’ in the xoz plane. (a) Simple model of nanoparticle superlattice  $M_1_4Au\_XZL$ . (b) Experimental SAXS result of  $M_1_4Au\_XZL$ . (c) SEM image of the nanoparticle superlattice  $M_1_4Au\_XZL$  at low magnification. Scale bar,  $1 \mu m$ .**

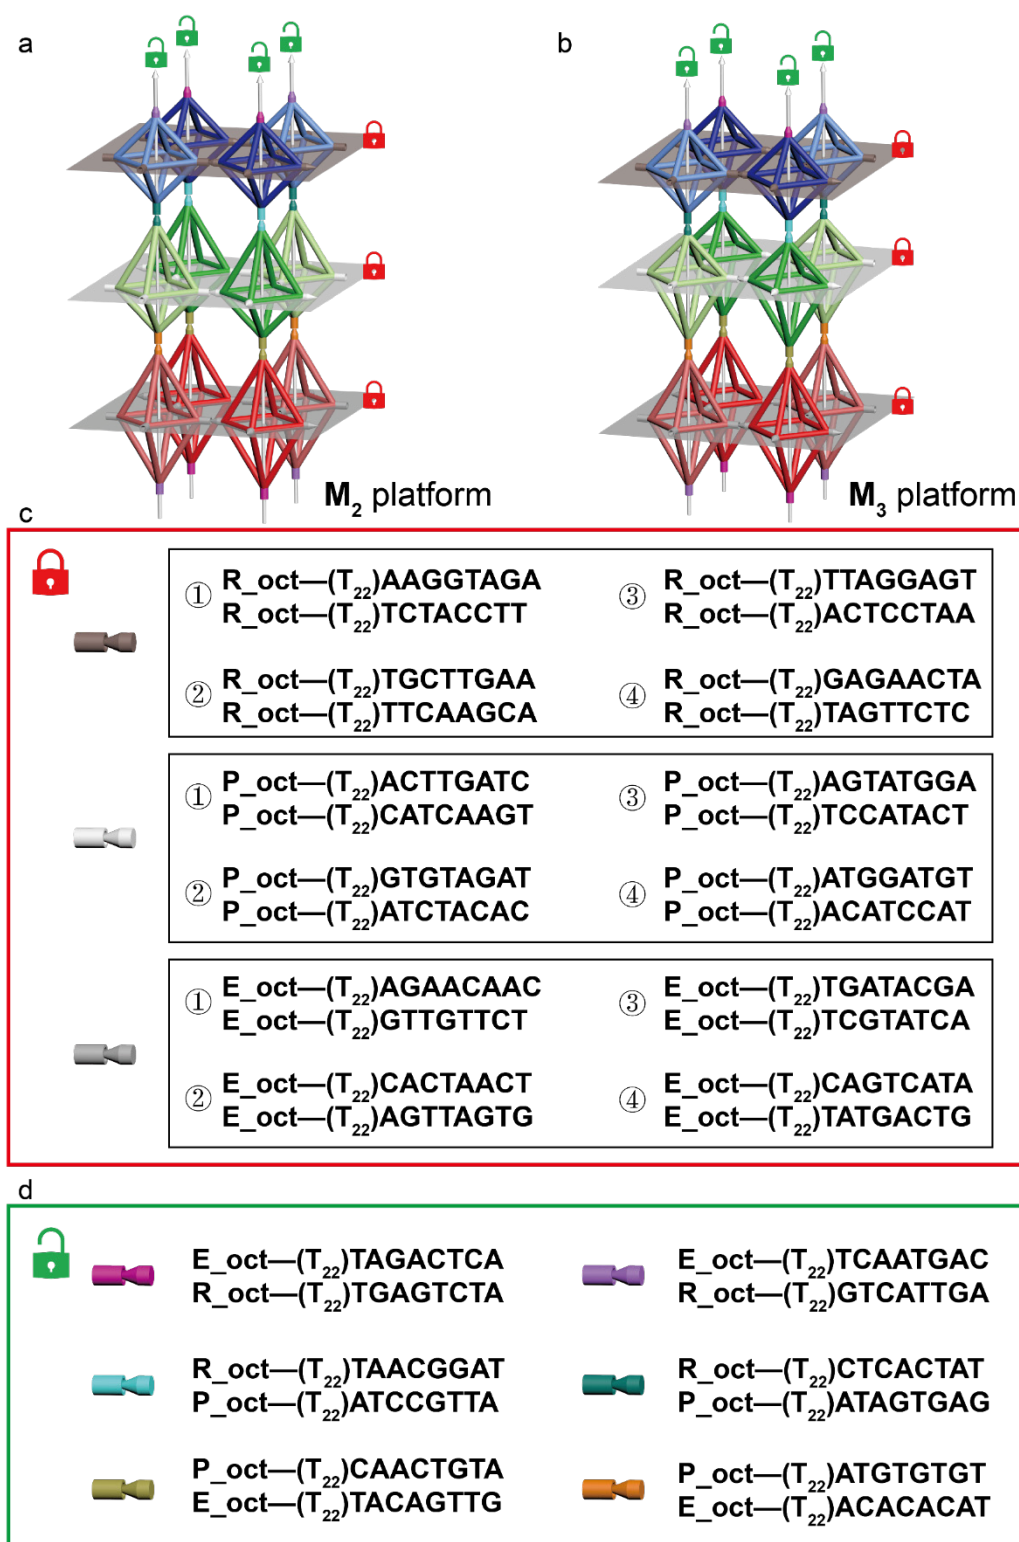

**Figure S18.** M<sub>2</sub> and M<sub>3</sub> platform both constructed by applying ‘unlocked mode’ and ‘locked mode’ along the z-axis and in the xoy plane, respectively. (a) Enlarged model of M<sub>2</sub> platform. (b) Enlarged model of M<sub>3</sub> platform. (c) Detailed sequences of SEs used in the ‘locked mode’ in both platforms. (d) Detailed sequences of SEs used in



the ‘unlocked mode’ in both platforms.

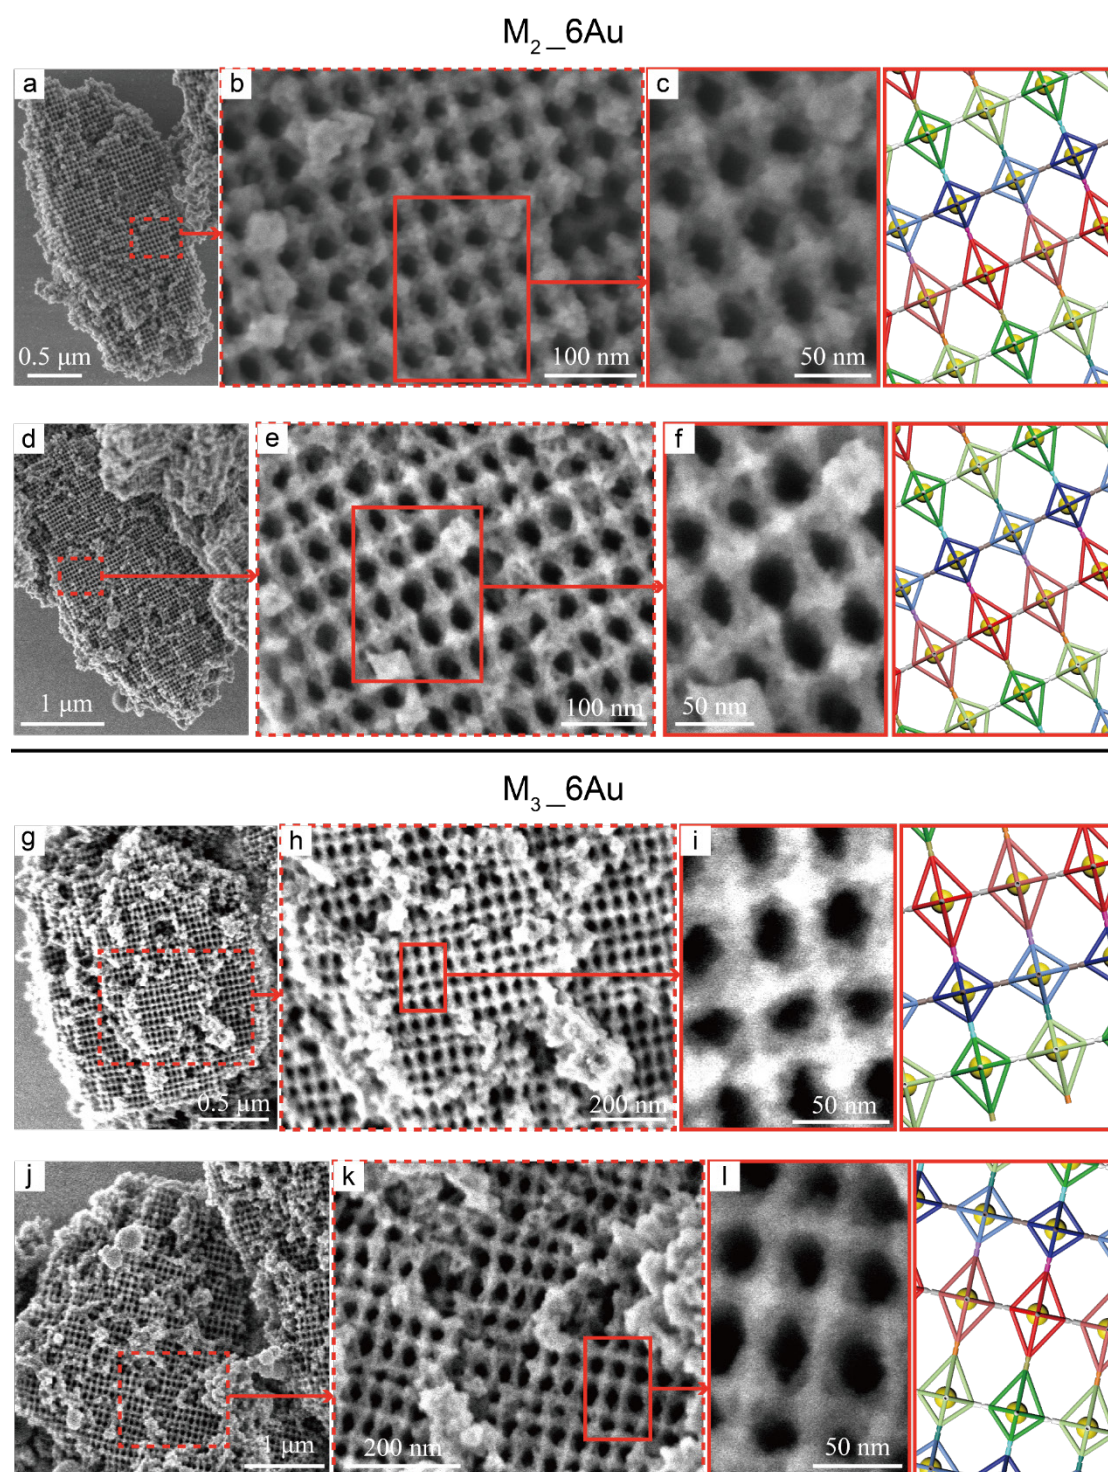

**Figure S19. Representative SEM images of superlattices  $M_2\_6Au$  and  $M_3\_6Au$  after coated with a thin layer of silica.** (a) SEM image of superlattice  $M_2\_6Au$ . Scale bar, 0.5  $\mu m$ . (b) Close-up view of the region framed in the red dotted box in Figure S19a. Scale bar, 100 nm. (c) Close-up view of the region framed in the red box in Figure

S19b with corresponding model shown beside. Scale bar, 50 nm. (d) Another SEM image of superlattice M<sub>2</sub>\_6Au. Scale bar, 1 μm. (e) Close-up view of the region framed in the red dotted box in Figure S19d. Scale bar, 100 nm. (f) Close-up view of the region framed in the red box in Figure S19e with corresponding model shown beside. Scale bar, 50 nm. (g) SEM image of superlattice M<sub>3</sub>\_6Au. Scale bar, 0.5 μm. (h) Close-up view of the region framed in the red dotted box in Figure S19g. Scale bar, 200 nm. (i) Close-up view of the region framed in the red box in Figure S19h with corresponding model shown beside. Scale bar, 50 nm. (j) Another SEM image of superlattice M<sub>3</sub>\_6Au. Scale bar, 1 μm. (k) Close-up view of the region framed in the red dotted box in Figure S19j. Scale bar, 200 nm. (l) Close-up view of the region framed in the red box in Figure S19k with corresponding model shown beside. Scale bar, 50 nm.

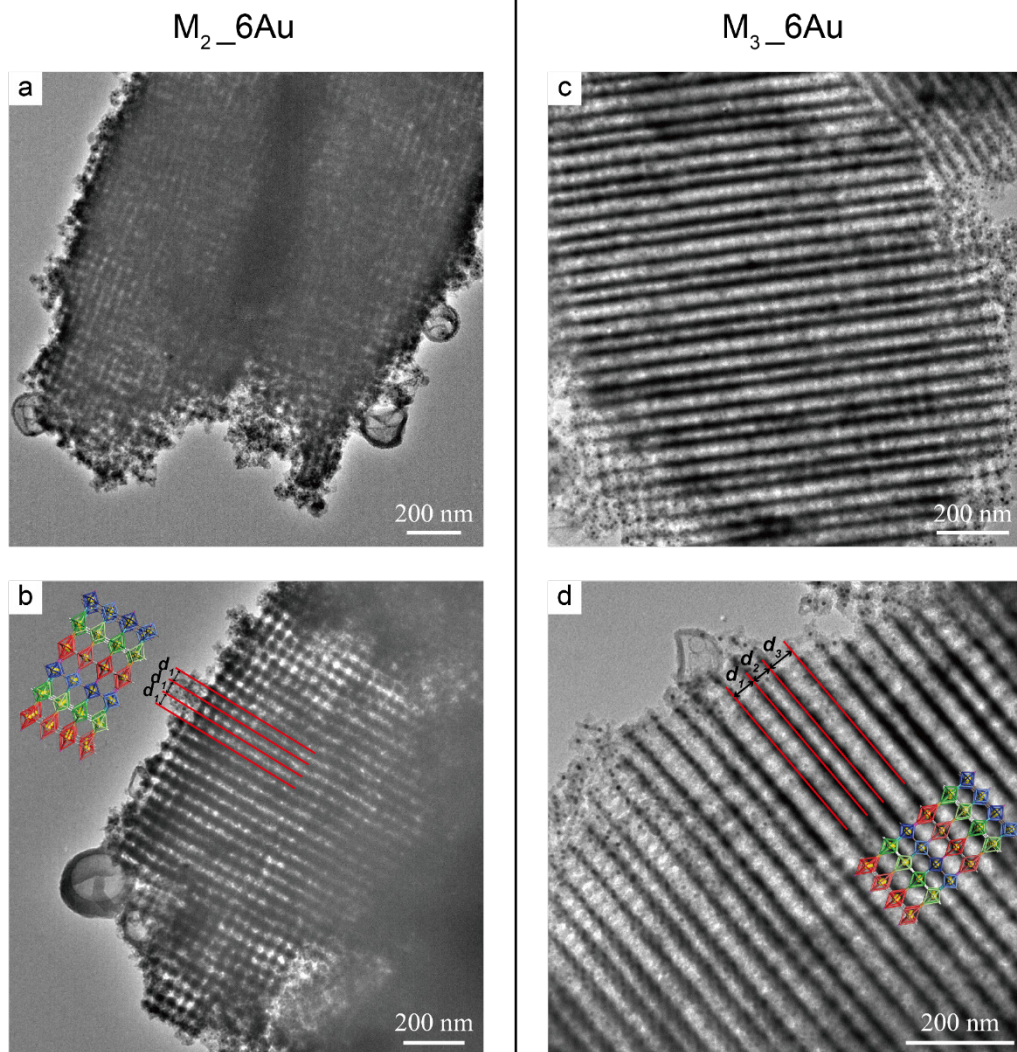

**Figure S20. Representative TEM images of superlattices  $M_2\_6Au$  and  $M_3\_6Au$  after coated with a thin layer of silica.** (a, b) TEM images of superlattice  $M_2\_6Au$ . The layer spacing is measured to be the same (equal to  $d_1$ ) corresponding to the model shown beside (b). Scale bars, 200 nm. (c, d) TEM images of superlattice  $M_3\_6Au$ . The layer spacing is measured to be different (respectively equal to  $d_1$ ,  $d_2$  and  $d_3$ ) corresponding to the model shown beside (d). Scale bars, 200 nm.



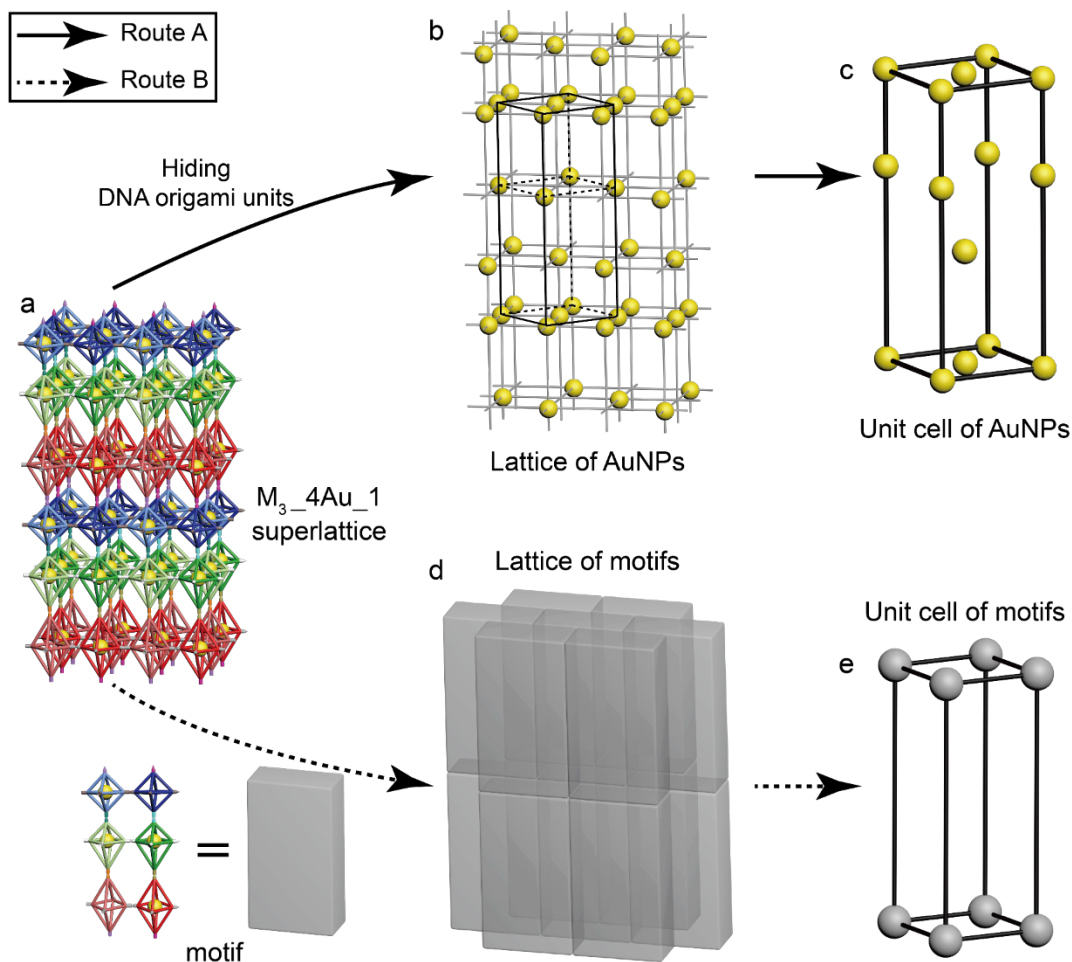

**Figure S21. Two different routes can be adopted to understand the structure of DOF/NP complex crystals by taking superlattice  $M_3_4Au_1$  as an example.**

**Route A:** a-b-c. Superlattice  $M_3_4Au_1$  (a) can be understood as a nanoparticle superlattice (b) through ignoring the DOF platforms, of which the unit cell is composed of gold nanoparticles (AuNPs) (c).

**Route B:** a-d-e. Superlattice  $M_3_4Au_1$  (a) can be understood by simultaneously considering DOFs and AuNPs, where the six-unit cluster could be considered as the basic motif. Hence, superlattice can be exhibited in the form of the basic motifs stacking (d), of which the unit cell is a simple tetragonal structure (e).

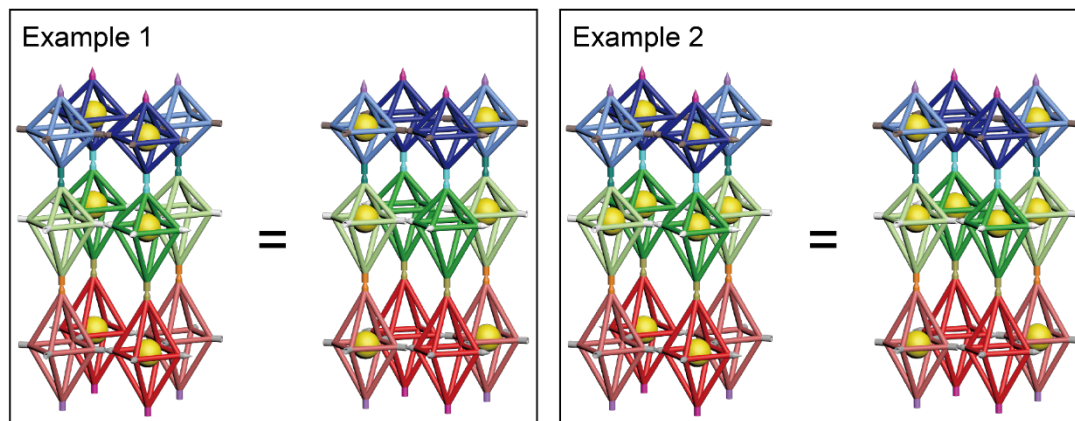

**Figure S22. Two groups of superlattices based on  $M_3$  platform are selected as examples to illustrate the concept of equivalence of crystal structures.**  $M_3$  platform is constructed by six types of DNA origami octahedral ‘homologs’ consisting of two  $R_{oct}$ , two  $E_{oct}$  and two  $P_{oct}$  DNA origami octahedral ‘homologs’. Interestingly, the  $M_3$  platform can be logically considered as a binary system, where the three light colored building blocks and the three dark building blocks respectively act as one of the units. Therefore, the DOF/NP superlattices fabricated based on exchanging the positions of inserting AuNPs between the two units is logically equivalent.

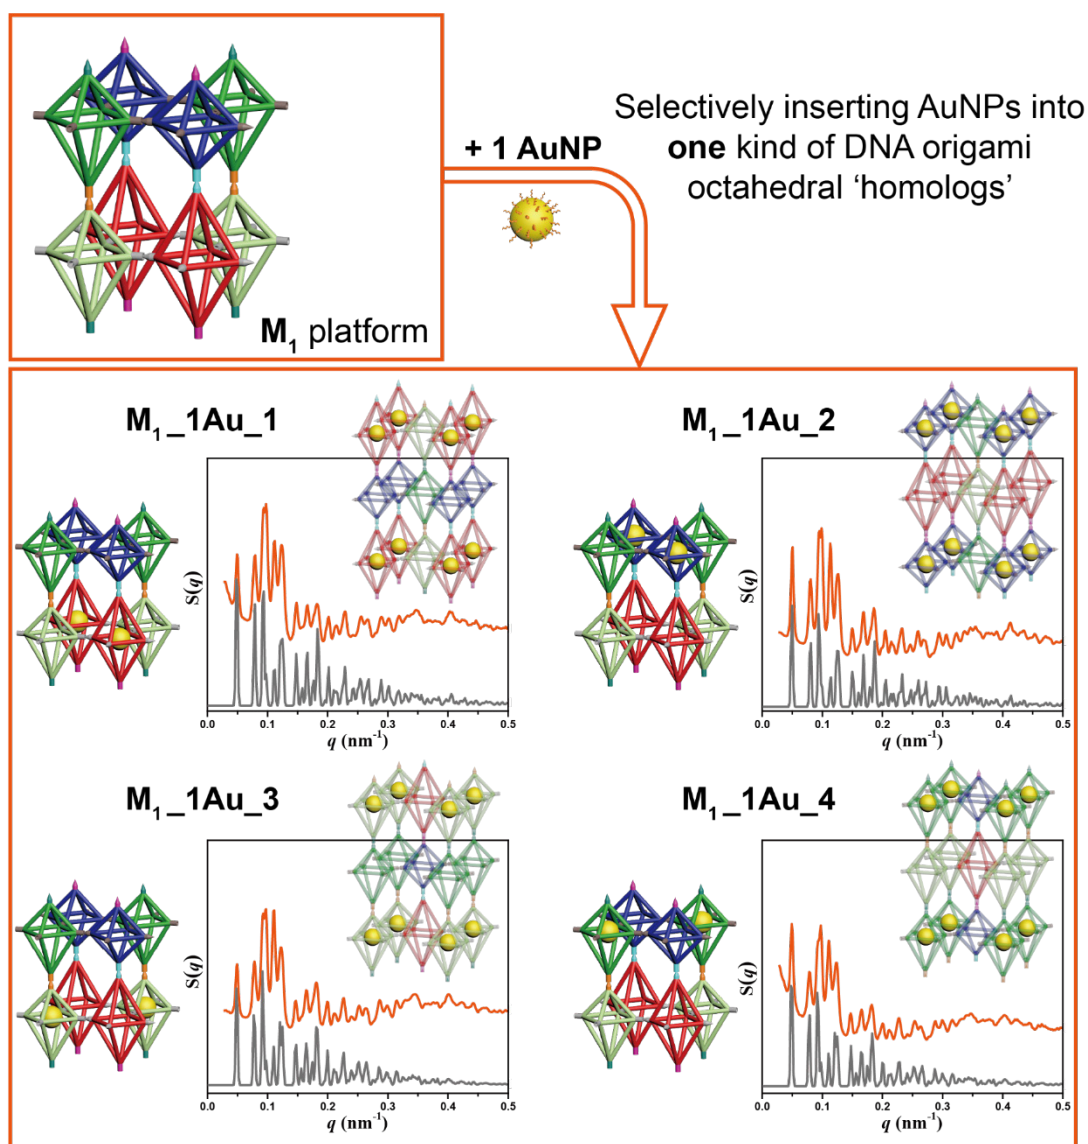

**Figure S23.** SAXS characterization of superlattices  $M_1$ \_1Au\_1,  $M_1$ \_1Au\_2,  $M_1$ \_1Au\_3 and  $M_1$ \_1Au\_4 constructed on the basis of  $M_1$  platform by selectively inserting AuNPs into one kind of DNA origami octahedral 'homolog'. From left to right, each panel contains  $M_1$  platform where AuNPs are selectively inserted into one kind of DNA origami octahedral 'homolog', experimental SAXS data (orange) compared against simulation curve (grey) and corresponding unit cell of AuNPs with external DOFs.

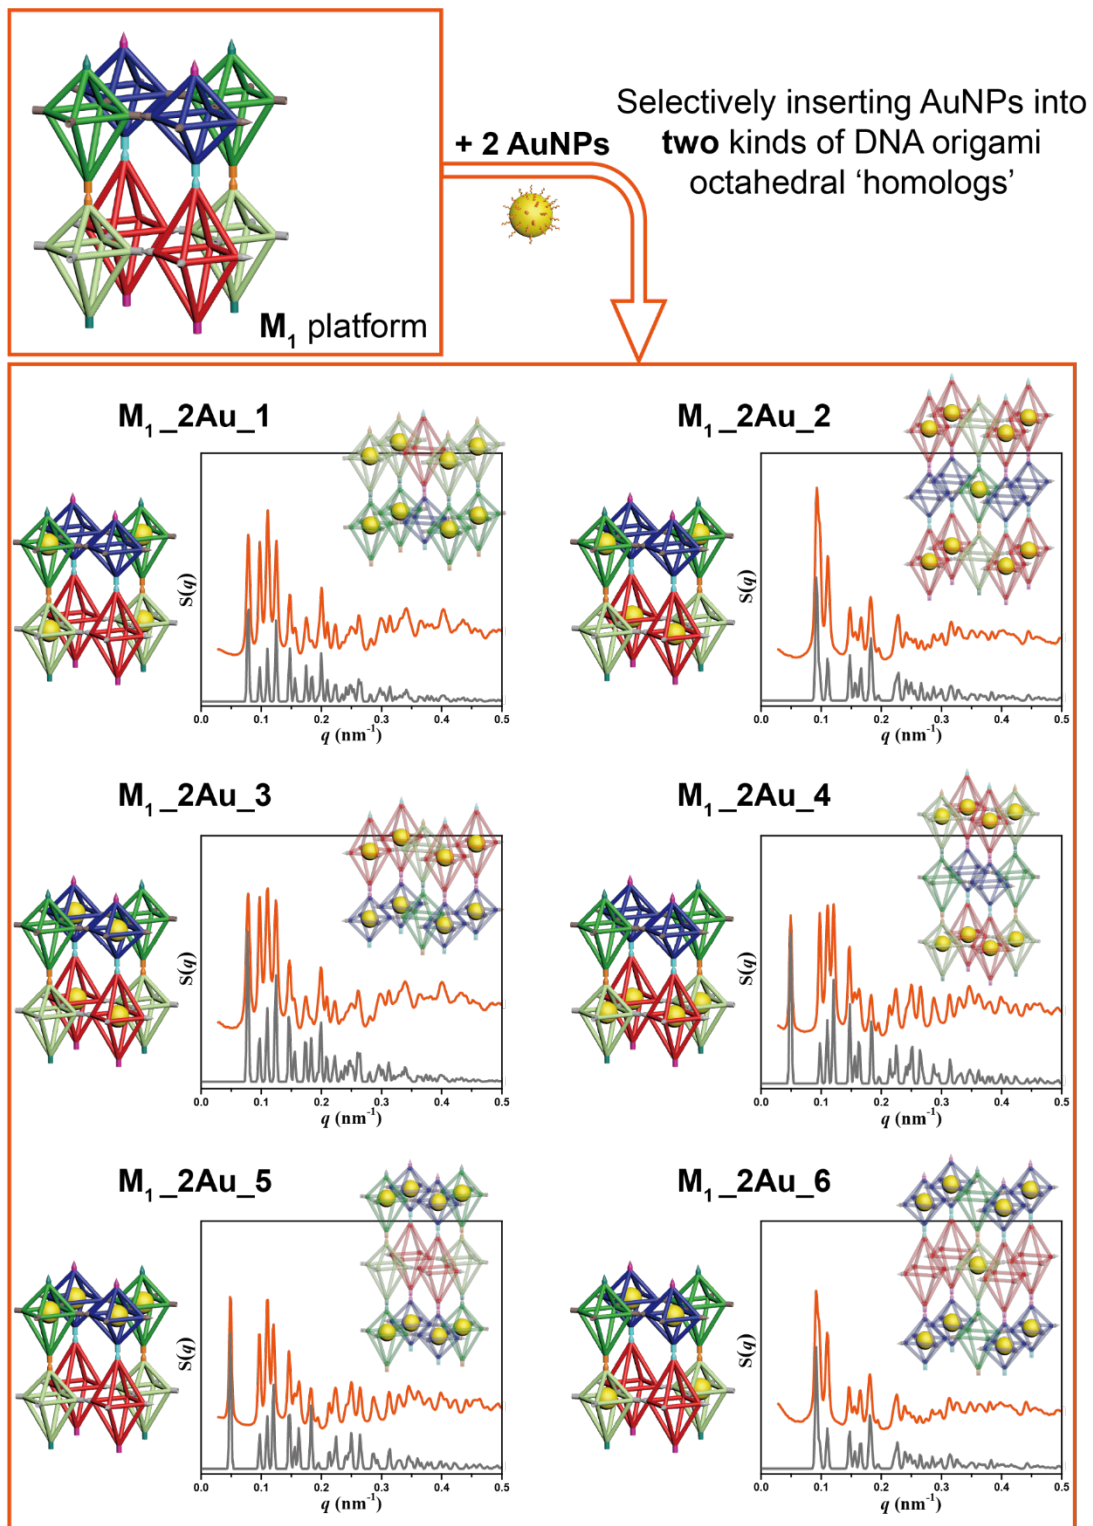

Figure S24. SAXS characterization of superlattices  $M_1\_2Au_1$ ,  $M_1\_2Au_2$ ,  $M_1\_2Au_3$ ,  $M_1\_2Au_4$ ,  $M_1\_2Au_5$  and  $M_1\_2Au_6$  constructed on the basis of  $M_1$  platform by selectively inserting AuNPs into two kinds of DNA origami octahedral 'homologs'. From left to right, each panel contains  $M_1$  platform where AuNPs are

selectively inserted into two kinds of DNA origami octahedral ‘homologs’, experimental SAXS data (orange) compared against simulation curve (grey) and corresponding unit cell of AuNPs with external DOFs.

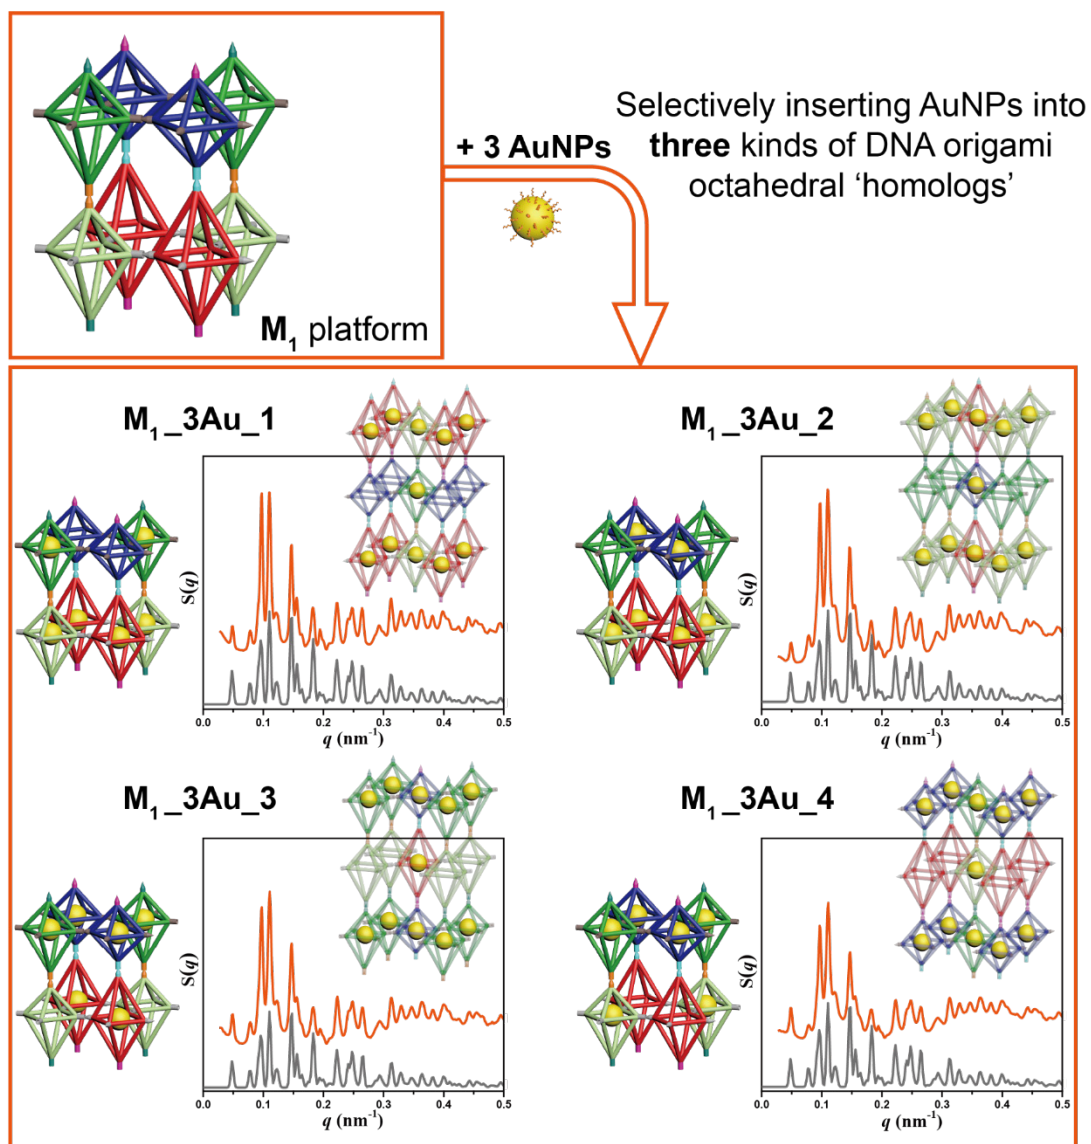

**Figure S25.** SAXS characterization of superlattices **M<sub>1</sub>\_3Au\_1**, **M<sub>1</sub>\_3Au\_2**, **M<sub>1</sub>\_3Au\_3** and **M<sub>1</sub>\_3Au\_4** constructed on the basis of **M<sub>1</sub>** platform by selectively inserting AuNPs into three kinds of DNA origami octahedral 'homologs'. From left to right, each panel contains **M<sub>1</sub>** platform where AuNPs are selectively inserted into three kinds of DNA origami octahedral 'homologs', experimental SAXS data (orange) compared against simulation curve (grey) and corresponding unit cell of AuNPs with external DOFs.



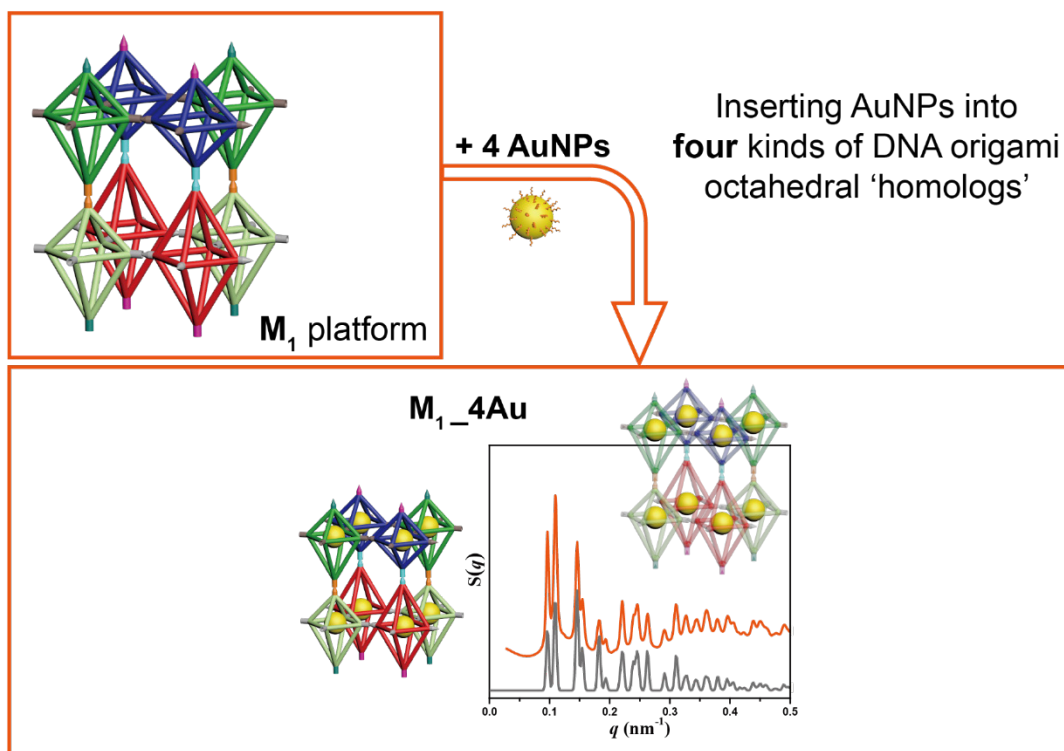

**Figure S26. SAXS characterization of superlattice  $M_1\_4Au$  constructed on the basis of  $M_1$  platform by inserting AuNPs into all four kinds of DNA origami octahedral ‘homologs’.** From left to right, the panel contains  $M_1$  platform where AuNPs are inserted into all four kinds of DNA origami octahedral ‘homologs’, experimental SAXS data (orange) compared against simulation curve (grey) and corresponding unit cell of AuNPs with external DOFs.

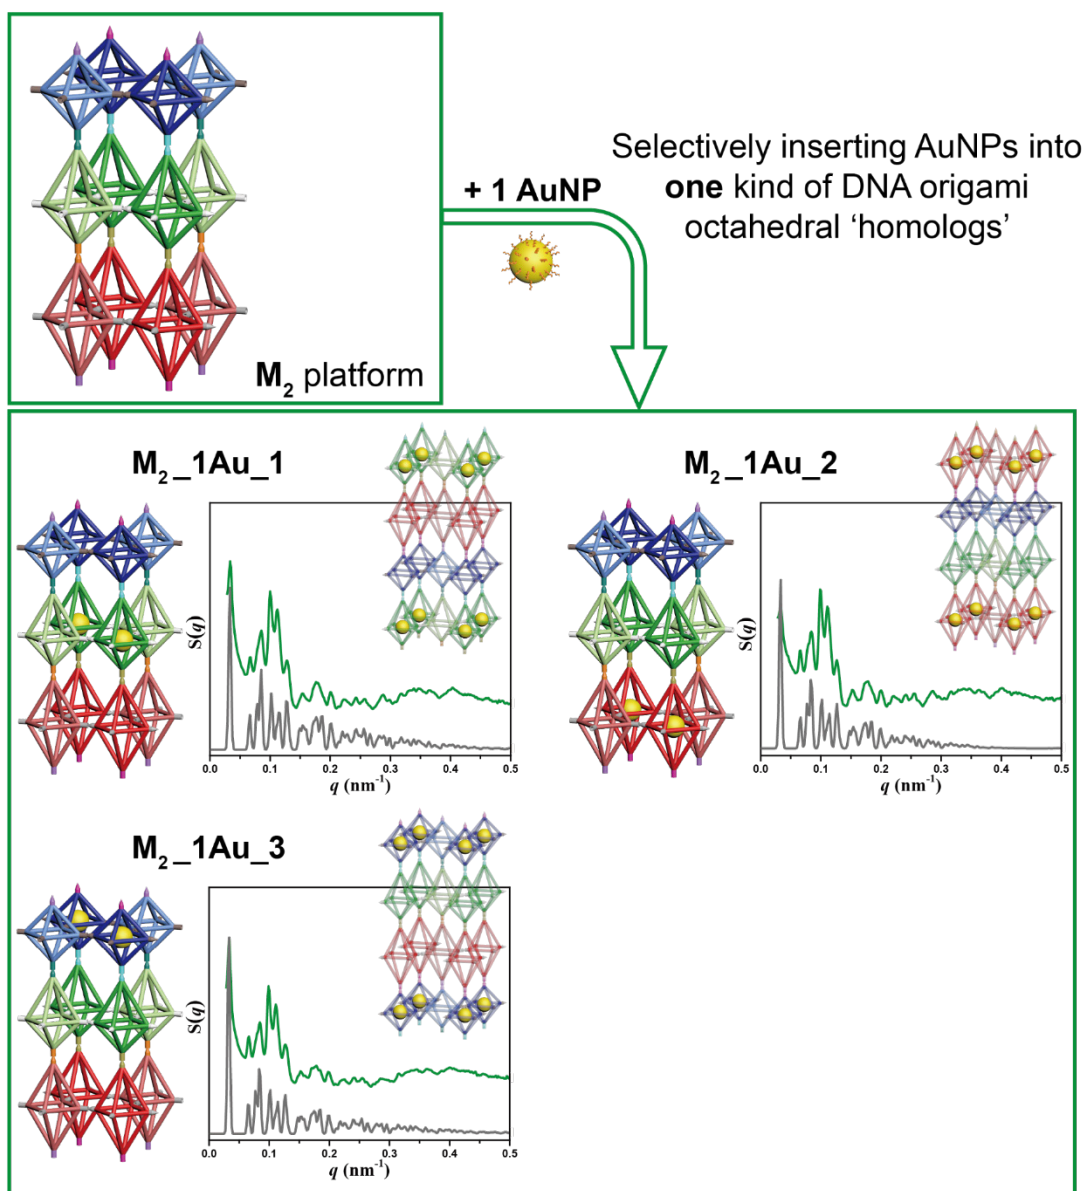

**Figure S27. SAXS characterization of superlattices  $M_2\_1Au\_1$ ,  $M_2\_1Au\_2$  and  $M_2\_1Au\_3$  constructed on the basis of  $M_2$  platform by selectively inserting AuNPs into one kind of DNA origami octahedral 'homolog'. From left to right, each panel contains  $M_2$  platform where AuNPs are selectively inserted into one kind of DNA origami octahedral 'homolog', experimental SAXS data (green) compared against simulation curve (grey) and corresponding unit cell of AuNPs with external DOFs.**



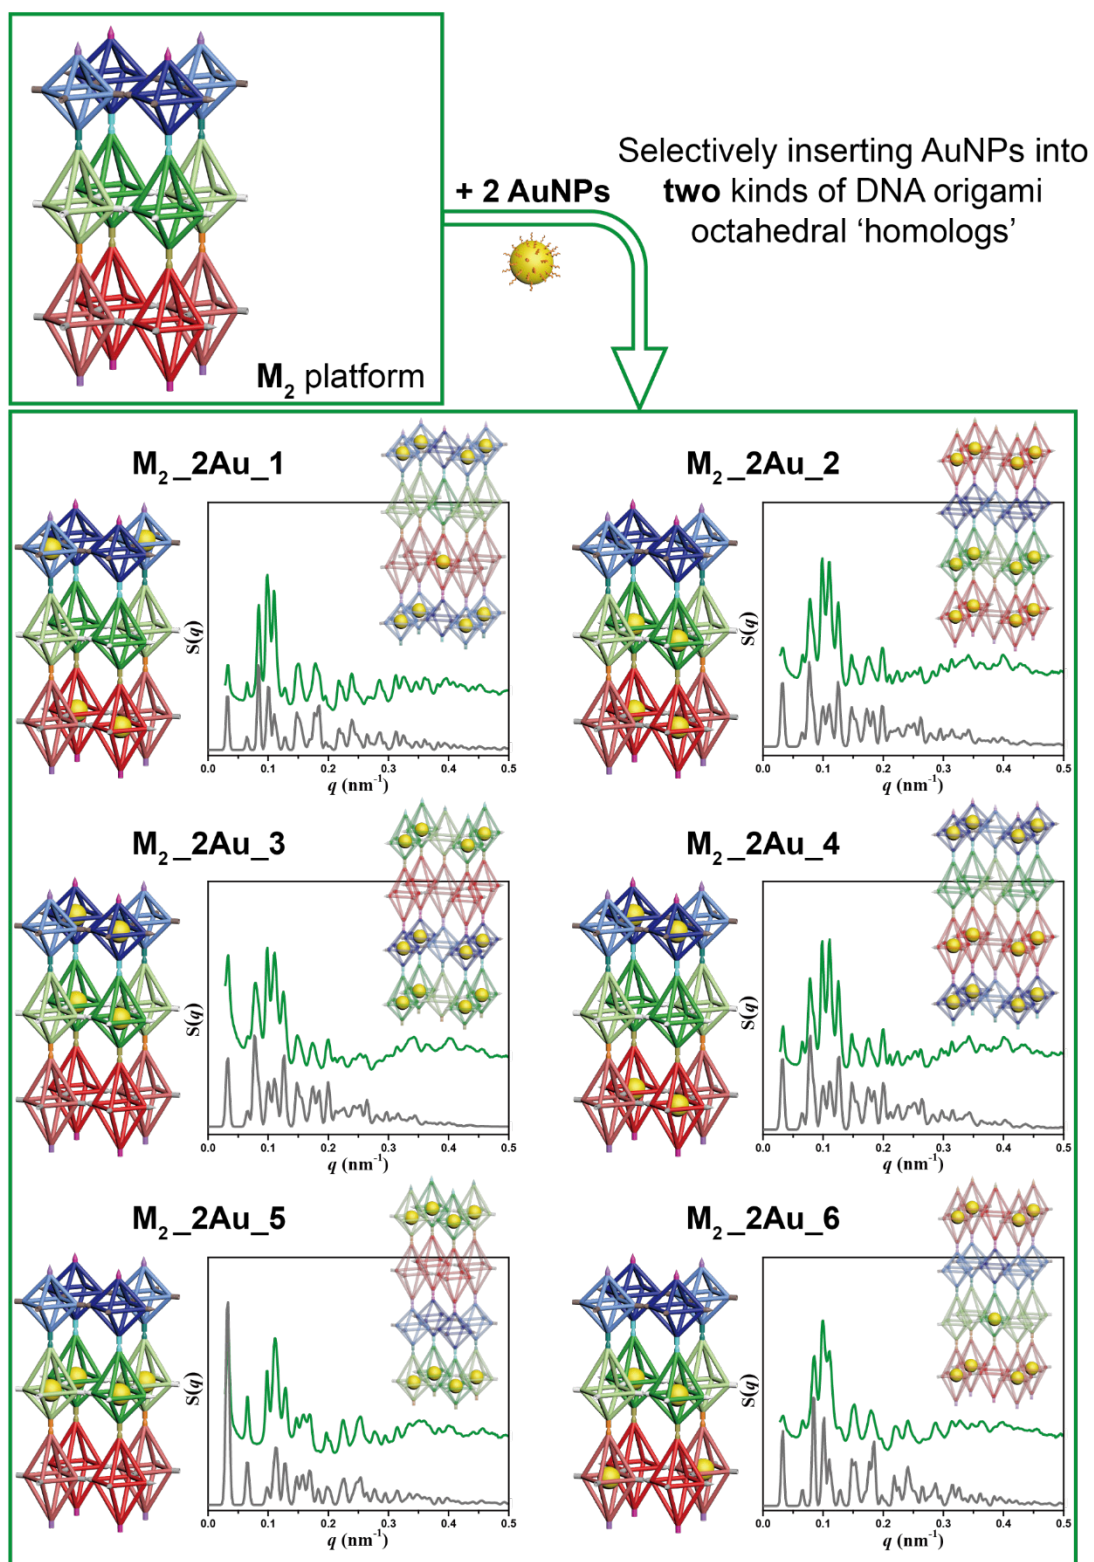

Figure S28. SAXS characterization of superlattices  $M_2\_2Au\_1$ ,  $M_2\_2Au\_2$ ,  $M_2\_2Au\_3$ ,  $M_2\_2Au\_4$ ,  $M_2\_2Au\_5$  and  $M_2\_2Au\_6$  constructed on the basis of  $M_2$  platform by selectively inserting AuNPs into two kinds of DNA origami octahedral 'homologs'. From left to right, each panel contains  $M_2$  platform where AuNPs are

selectively inserted into two kinds of DNA origami octahedral ‘homologs’, experimental SAXS data (green) compared against simulation curve (grey) and corresponding unit cell of AuNPs with external DOFs.

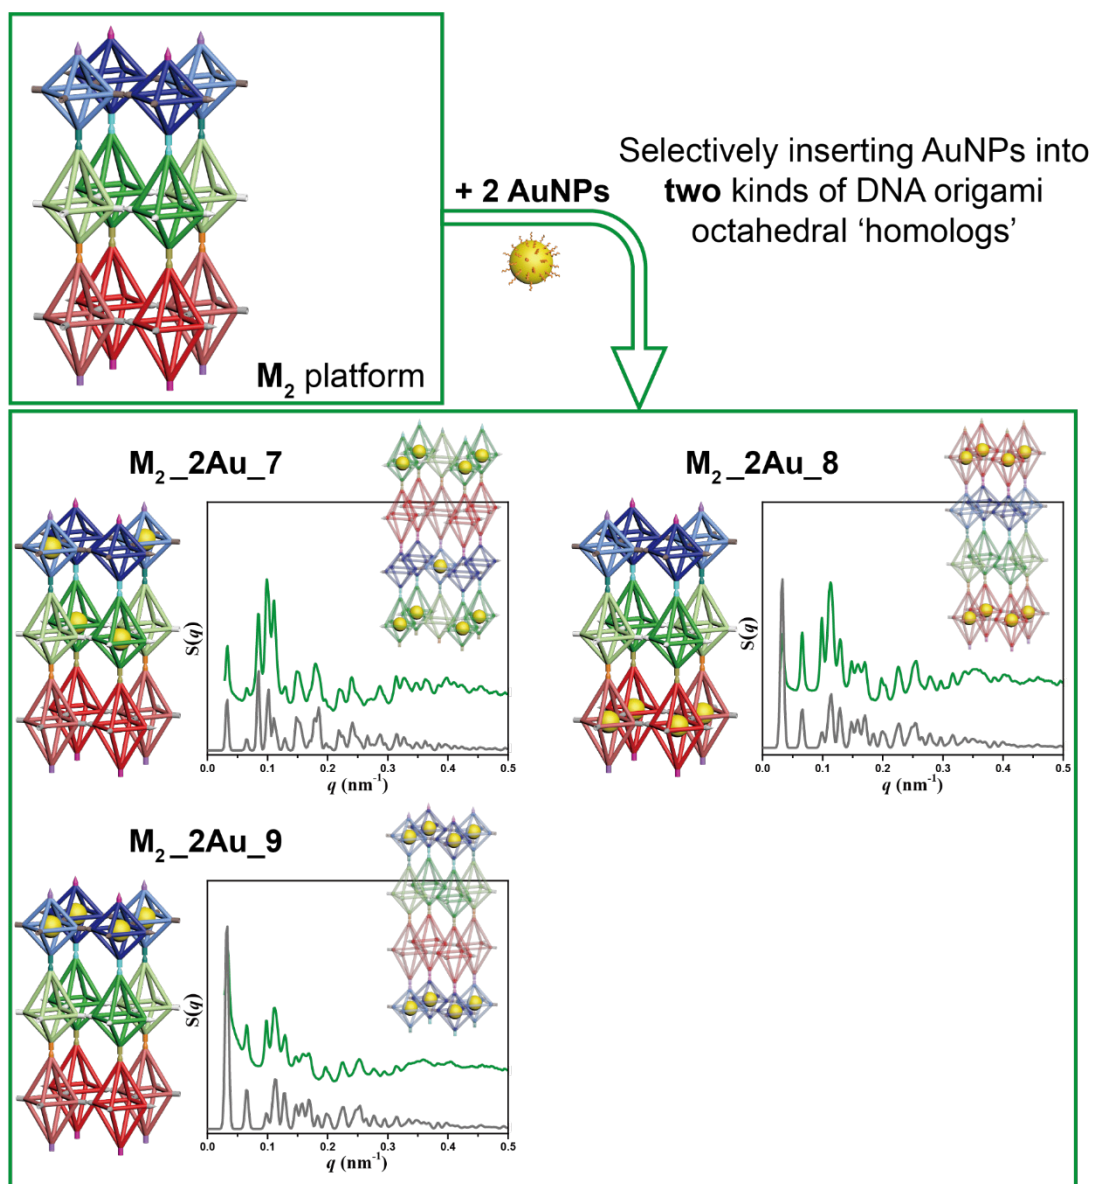

**Figure S29. SAXS characterization of superlattices  $M_2\_2Au\_7$ ,  $M_2\_2Au\_8$  and  $M_2\_2Au\_9$  constructed on the basis of  $M_2$  platform by selectively inserting AuNPs into two kinds of DNA origami octahedral 'homologs'. From left to right, each panel contains  $M_2$  platform where AuNPs are selectively inserted into two kinds of DNA origami octahedral 'homologs', experimental SAXS data (green) compared against simulation curve (grey) and corresponding unit cell of AuNPs with external DOFs.**

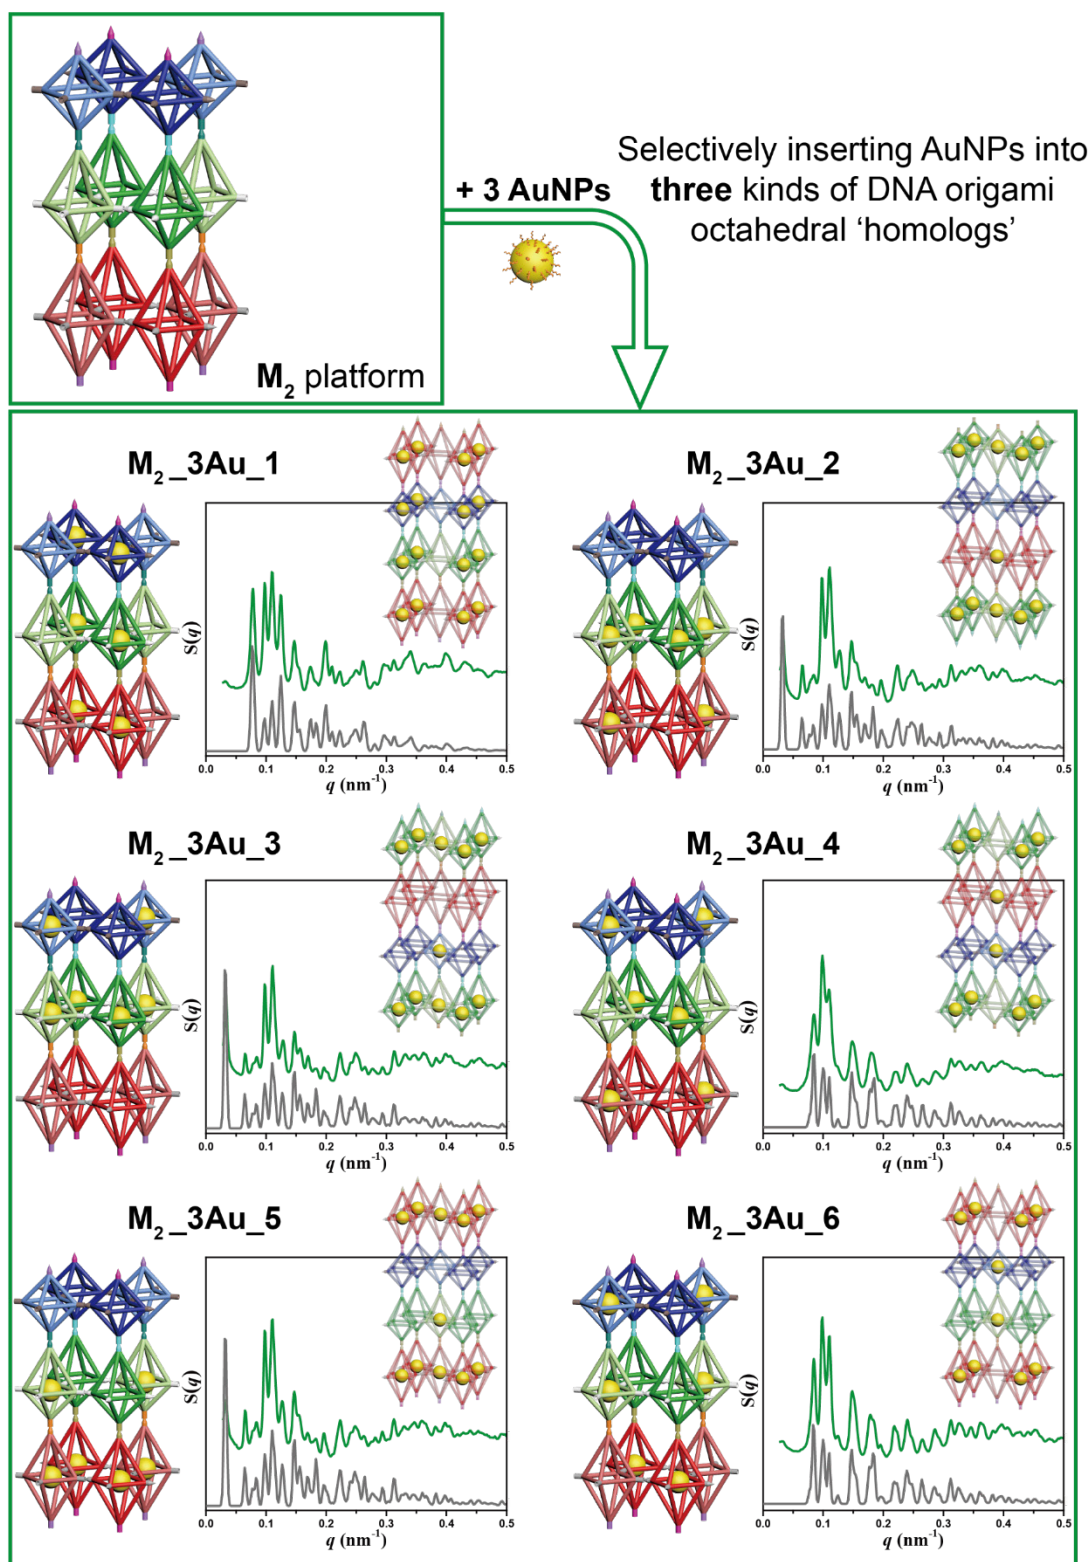

Figure S30. SAXS characterization of superlattices  $M_2\_3Au\_1$ ,  $M_2\_3Au\_2$ ,  $M_2\_3Au\_3$ ,  $M_2\_3Au\_4$ ,  $M_2\_3Au\_5$  and  $M_2\_3Au\_6$  constructed on the basis of  $M_2$  platform by selectively inserting AuNPs into three kinds of DNA origami octahedral 'homologs'. From left to right, each panel contains  $M_2$  platform where

AuNPs are selectively inserted into three kinds of DNA origami octahedral ‘homologs’, experimental SAXS data (green) compared against simulation curve (grey) and corresponding unit cell of AuNPs with external DOFs.

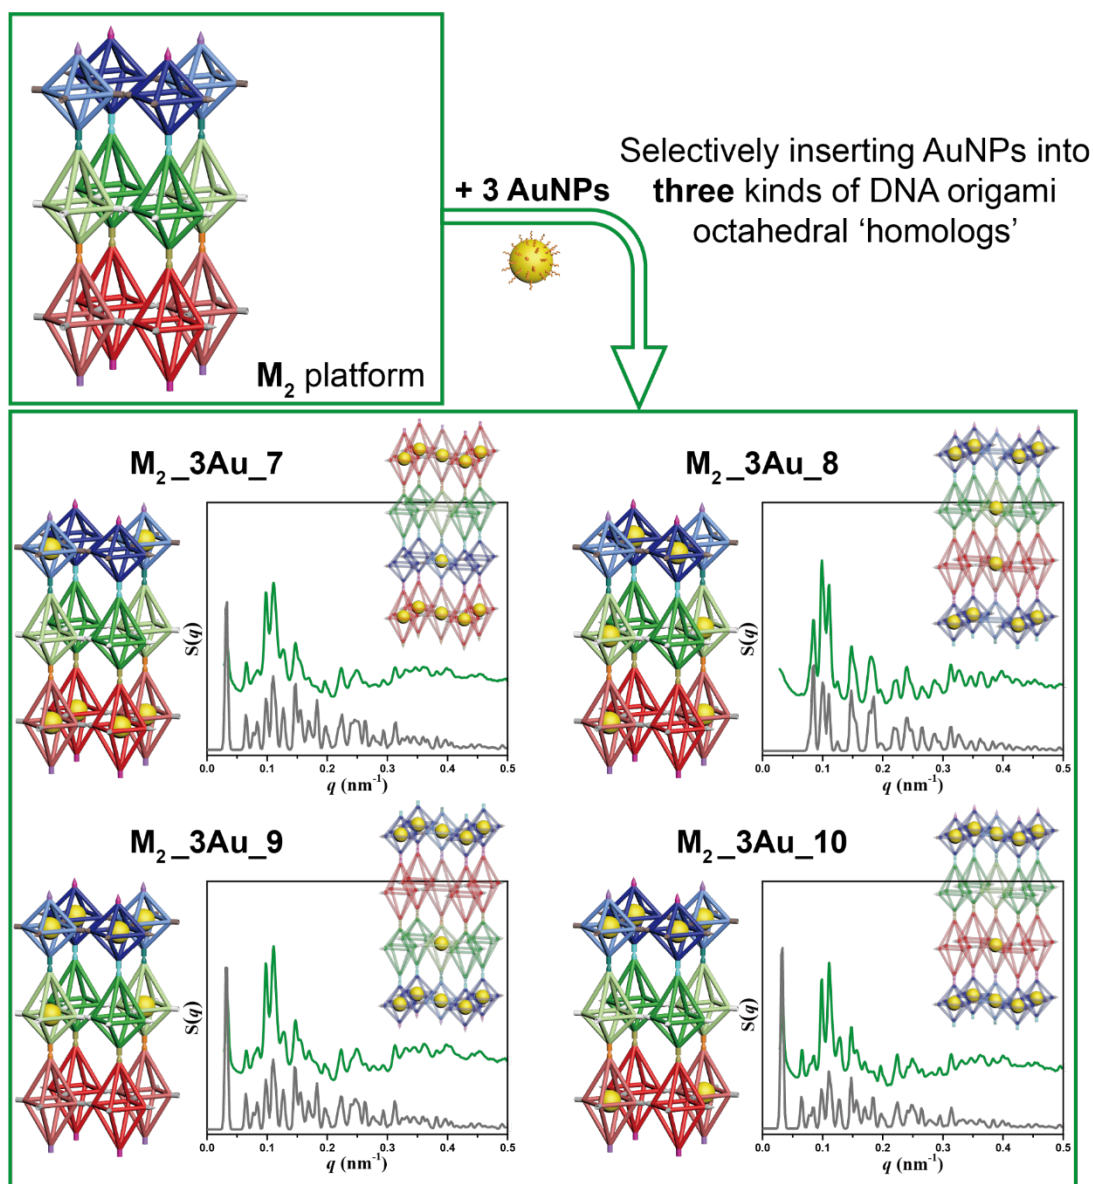

**Figure S31. SAXS characterization of superlattices  $M_2\_3Au\_7$ ,  $M_2\_3Au\_8$ ,  $M_2\_3Au\_9$  and  $M_2\_3Au\_10$  constructed on the basis of  $M_2$  platform by selectively inserting AuNPs into three kinds of DNA origami octahedral 'homologs'. From left to right, each panel contains  $M_2$  platform where AuNPs are selectively inserted into three kinds of DNA origami octahedral 'homologs', experimental SAXS data (green) compared against simulation curve (grey) and corresponding unit cell of AuNPs with external DOFs.**



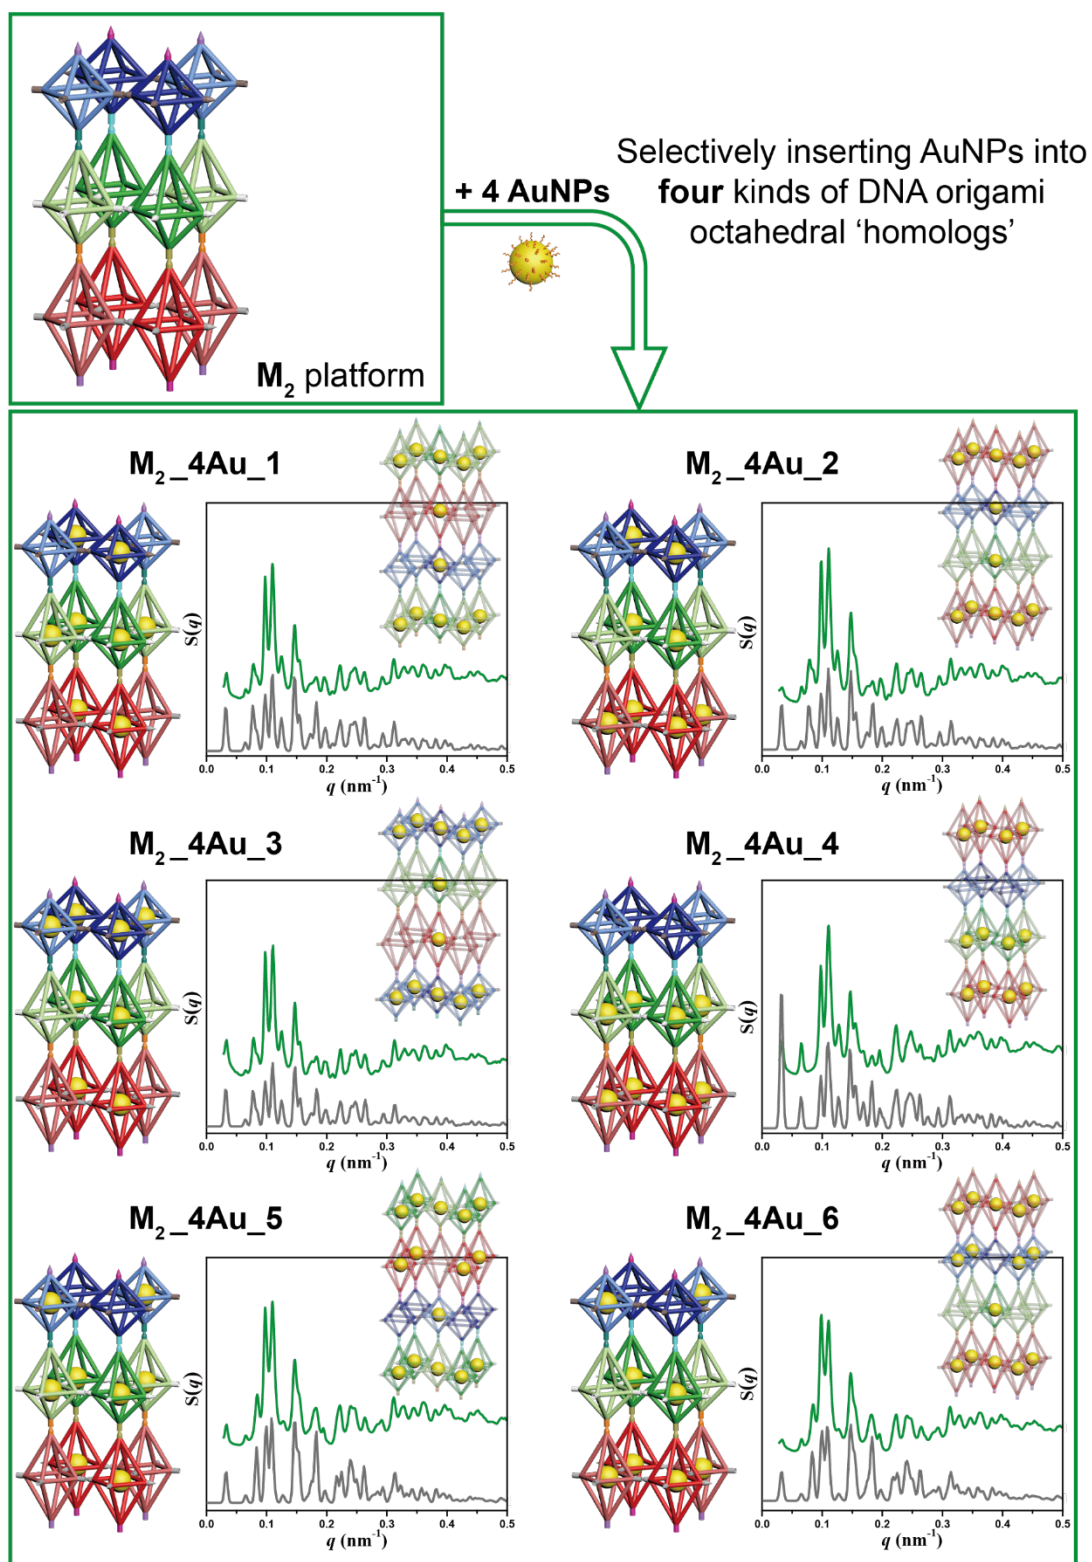

**Figure S32.** SAXS characterization of superlattices  $M_2\_4Au\_1$ ,  $M_2\_4Au\_2$ ,  $M_2\_4Au\_3$ ,  $M_2\_4Au\_4$ ,  $M_2\_4Au\_5$  and  $M_2\_4Au\_6$  constructed on the basis of  $M_2$  platform by selectively inserting AuNPs into four kinds of DNA origami octahedral 'homologs'. From left to right, each panel contains  $M_2$  platform where

AuNPs are selectively inserted into four kinds of DNA origami octahedral ‘homologs’, experimental SAXS data (green) compared against simulation curve (grey) and corresponding unit cell of AuNPs with external DOFs.



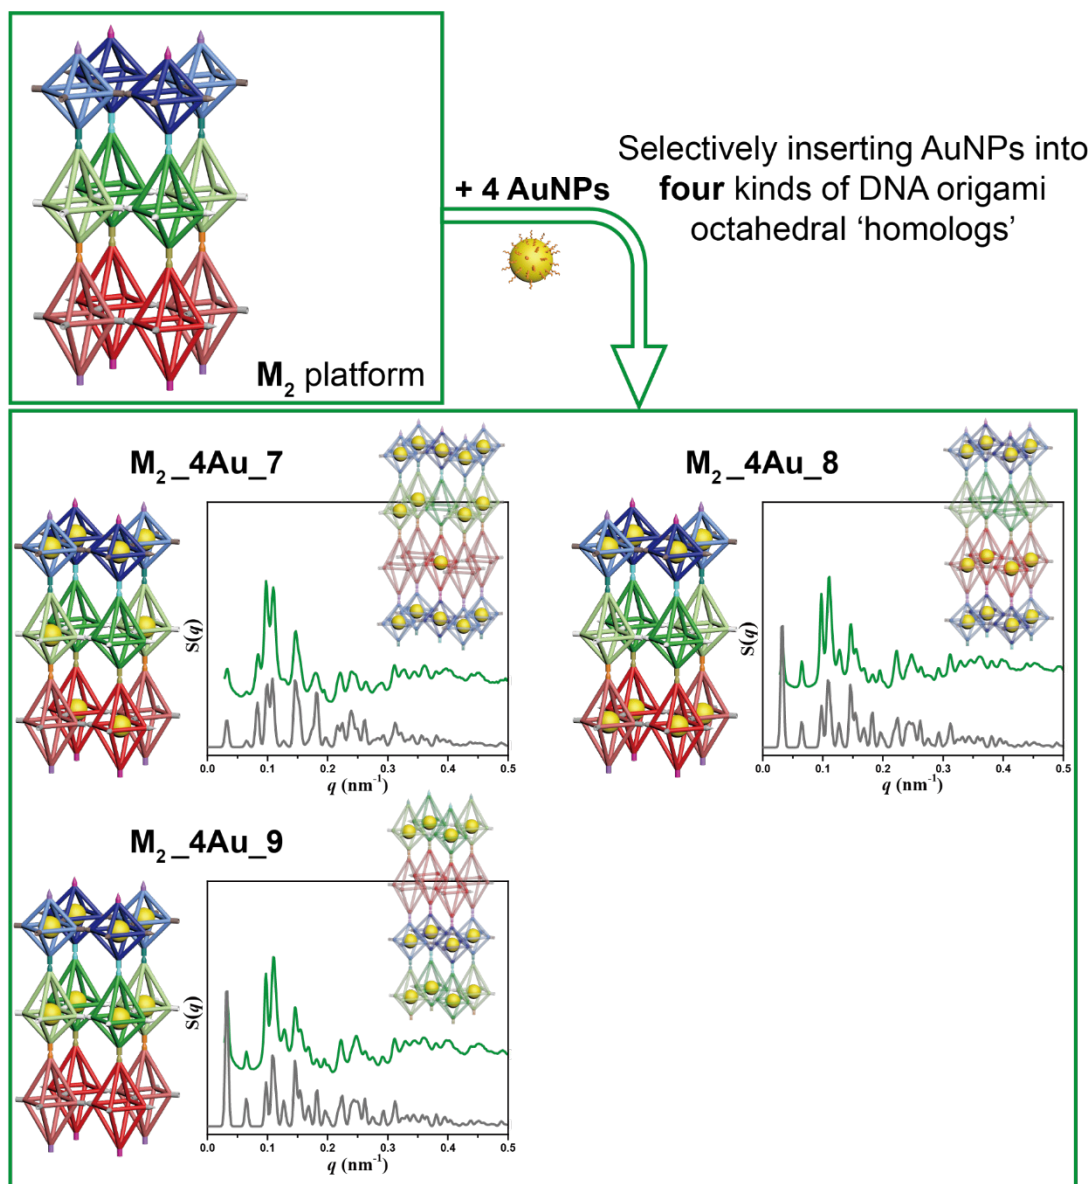

**Figure S33. SAXS characterization of superlattices  $M_2\_4Au\_7$ ,  $M_2\_4Au\_8$ , and  $M_2\_4Au\_9$  constructed on the basis of  $M_2$  platform by selectively inserting AuNPs into four kinds of DNA origami octahedral 'homologs'. From left to right, each panel contains  $M_2$  platform where AuNPs are selectively inserted into four kinds of DNA origami octahedral 'homologs', experimental SAXS data (green) compared against simulation curve (grey) and corresponding unit cell of AuNPs with external DOFs.**

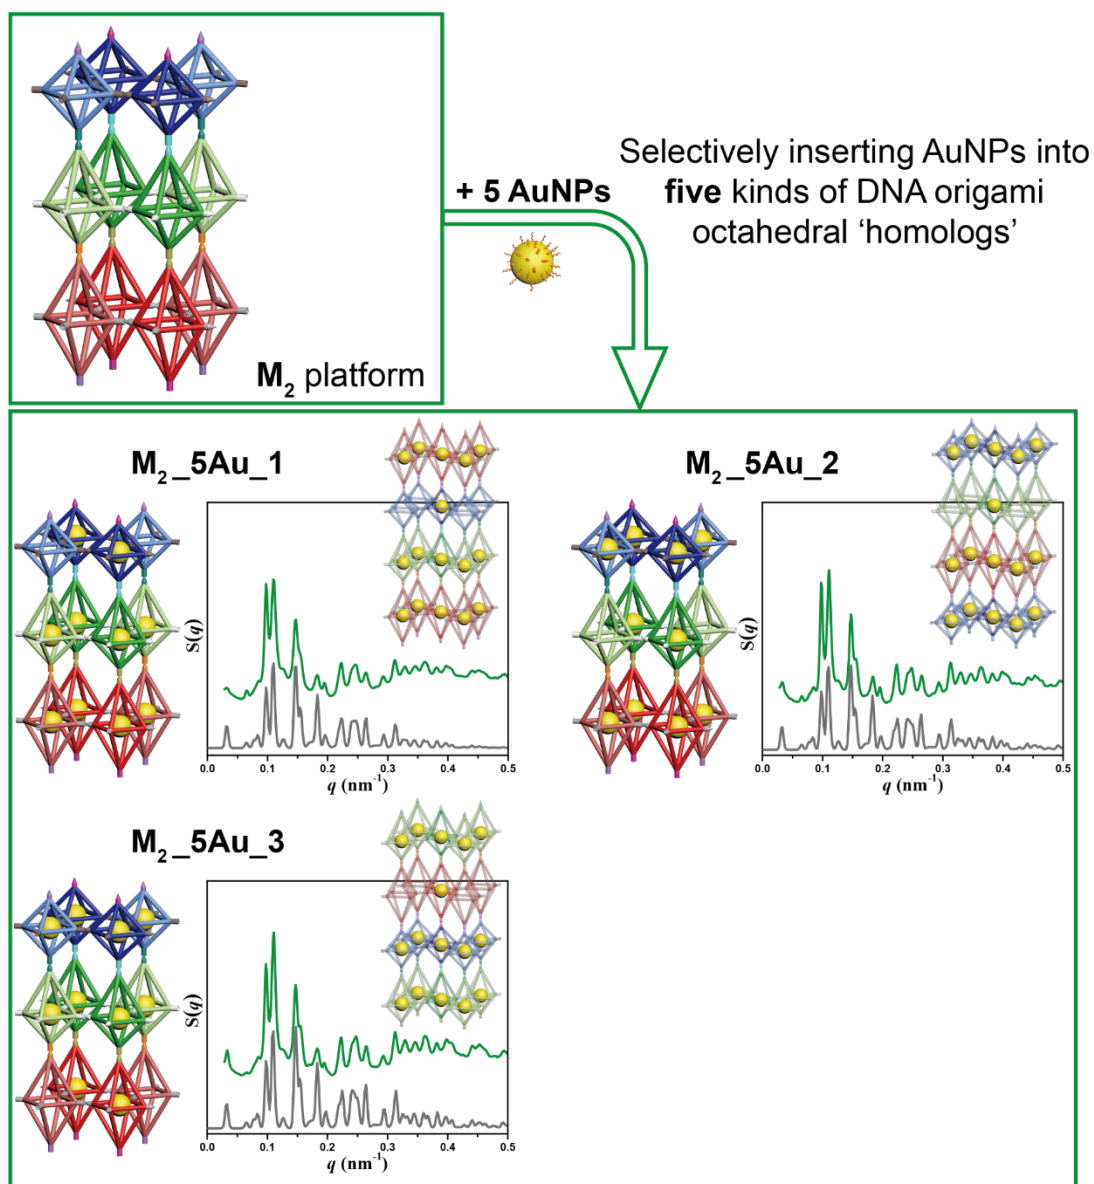

**Figure S34. SAXS characterization of superlattices  $M_2\_5Au\_1$ ,  $M_2\_5Au\_2$ , and  $M_2\_5Au\_3$  constructed on the basis of  $M_2$  platform by selectively inserting AuNPs into five kinds of DNA origami octahedral 'homologs'. From left to right, each panel contains  $M_2$  platform where AuNPs are selectively inserted into five kinds of DNA origami octahedral 'homologs', experimental SAXS data (green) compared against simulation curve (grey) and corresponding unit cell of AuNPs with external DOFs.**

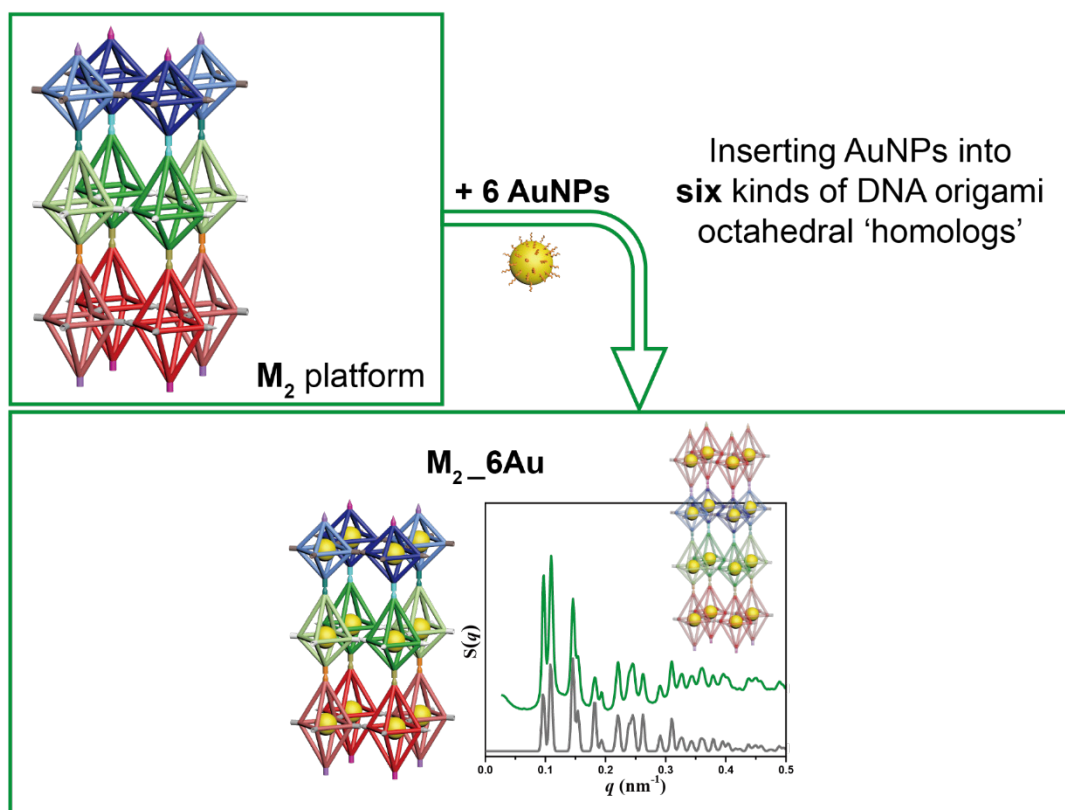

**Figure S35. SAXS characterization of superlattice  $M_2\_6Au$  constructed on the basis of  $M_2$  platform by inserting AuNPs into all six kinds of DNA origami octahedral ‘homologs’.** From left to right, the panel contains  $M_2$  platform where AuNPs are inserted into all six kinds of DNA origami octahedral ‘homologs’, experimental SAXS data (green) compared against simulation curve (grey) and corresponding unit cell of AuNPs with external DOFs.

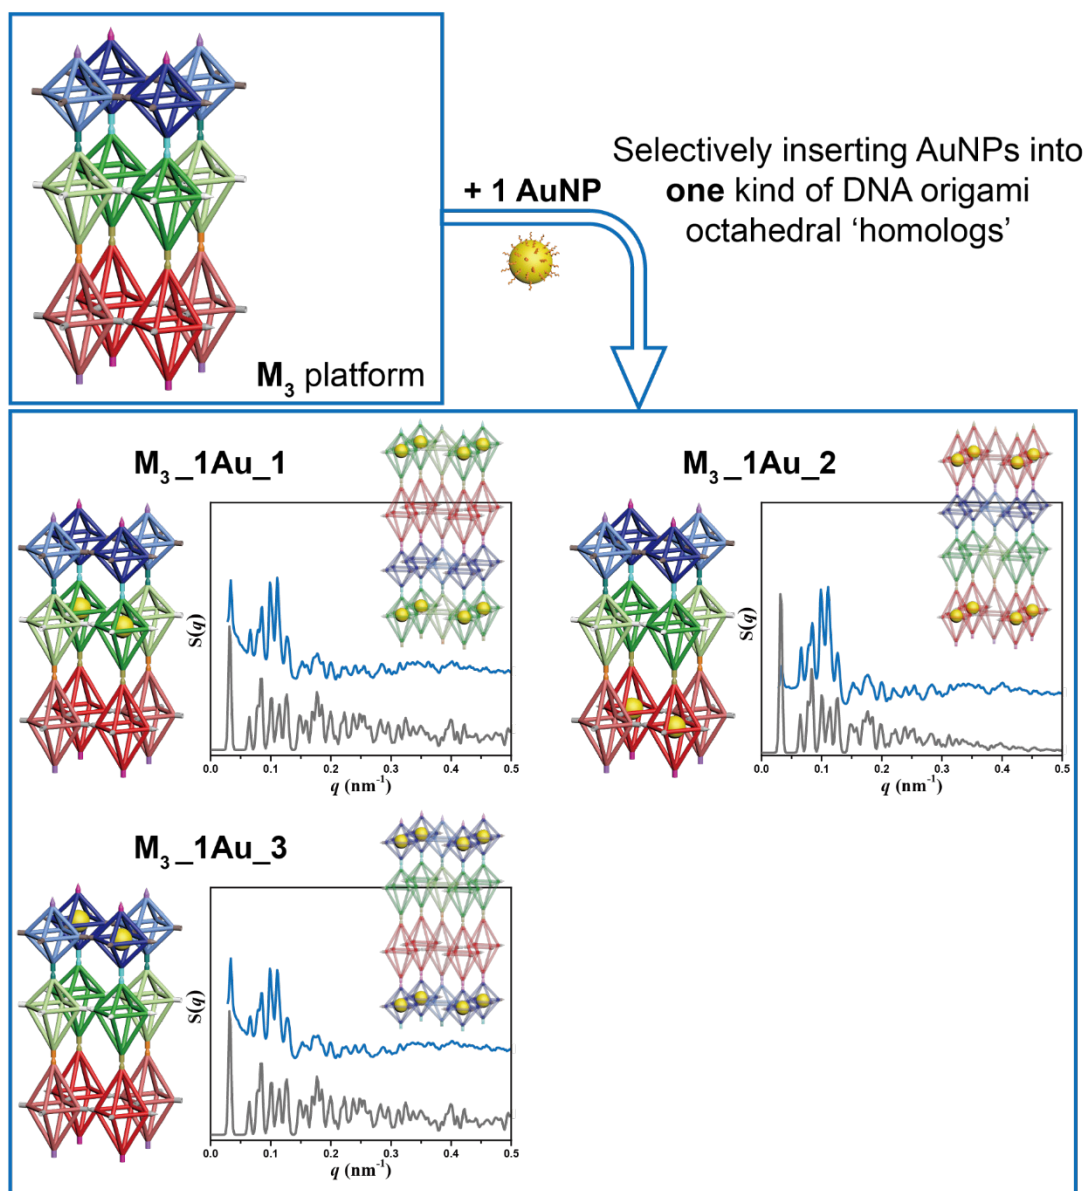

**Figure S36. SAXS characterization of superlattices  $M_3\_1Au\_1$ ,  $M_3\_1Au\_2$ , and  $M_3\_1Au\_3$  constructed on the basis of  $M_3$  platform by selectively inserting AuNPs into one kind of DNA origami octahedral 'homolog'. From left to right, each panel contains  $M_3$  platform where AuNPs are selectively inserted into one kind of DNA origami octahedral 'homolog', experimental SAXS data (blue) compared against simulation curve (grey) and corresponding unit cell of AuNPs with external DOFs.**

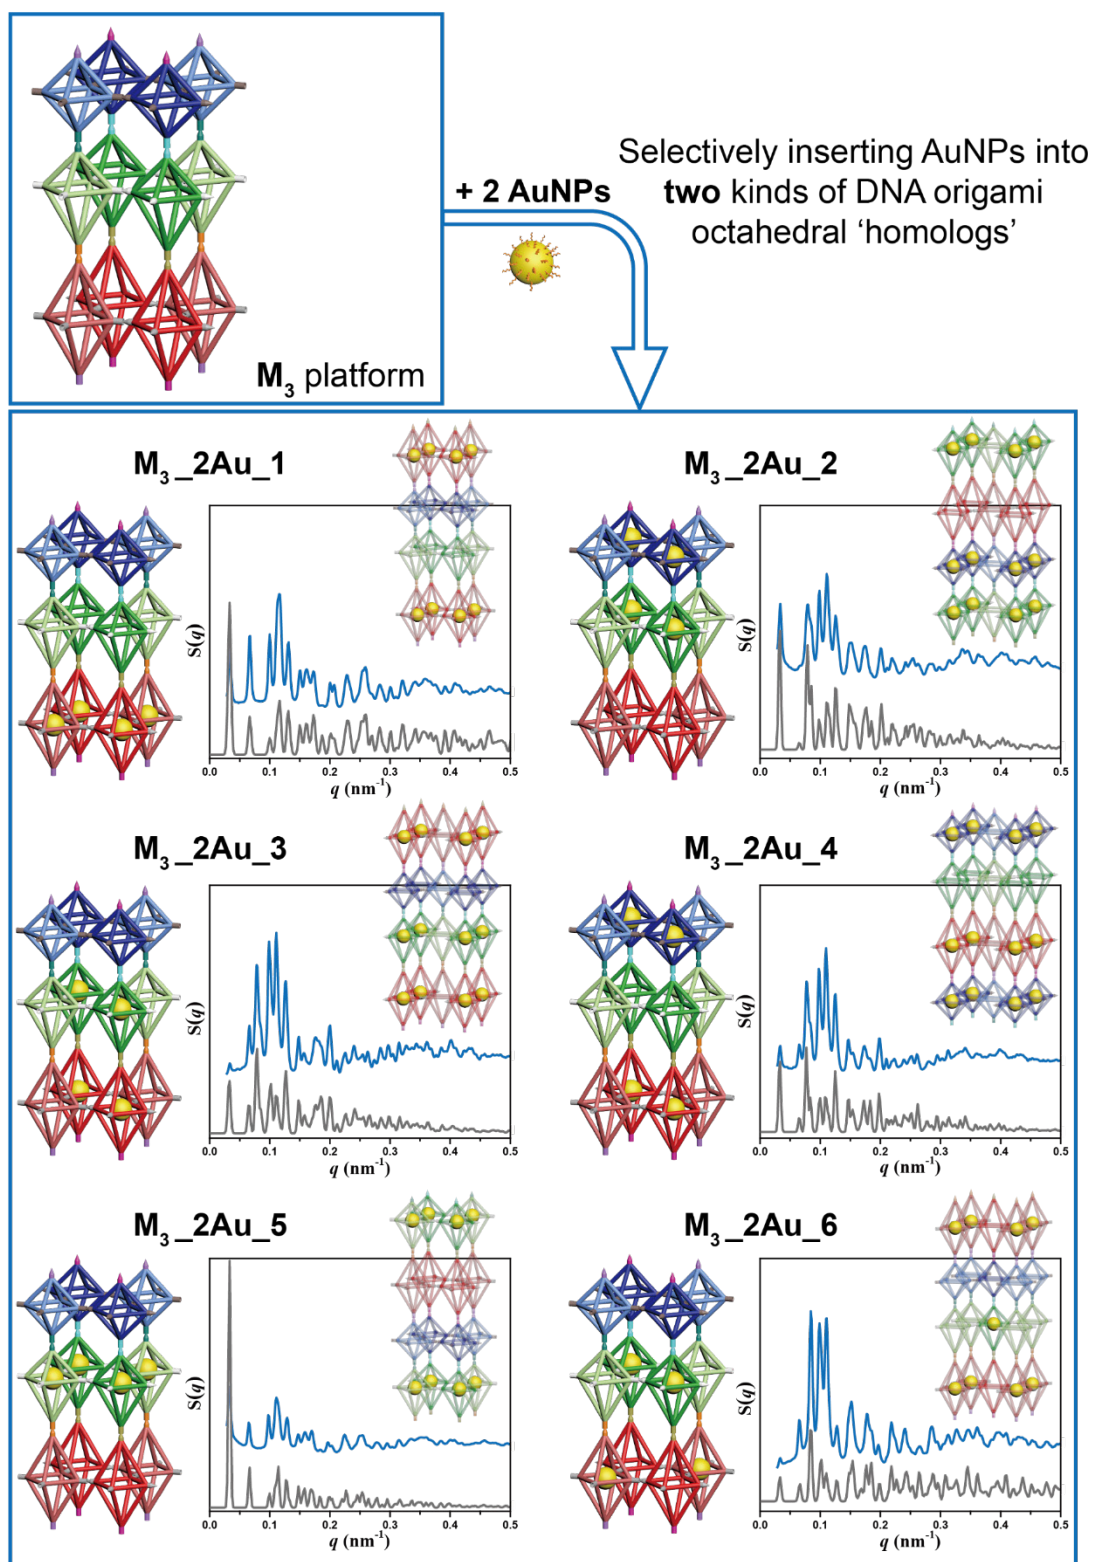

Figure S37. SAXS characterization of superlattices  $M_3\_2Au\_1$ ,  $M_3\_2Au\_2$ ,  $M_3\_2Au\_3$ ,  $M_3\_2Au\_4$ ,  $M_3\_2Au\_5$ , and  $M_3\_2Au\_6$  constructed on the basis of  $M_3$  platform by selectively inserting AuNPs into two kinds of DNA origami octahedral 'homologs'. From left to right, each panel contains  $M_3$  platform where AuNPs are

selectively inserted into two kinds of DNA origami octahedral ‘homologs’, experimental SAXS data (blue) compared against simulation curve (grey) and corresponding unit cell of AuNPs with external DOFs.



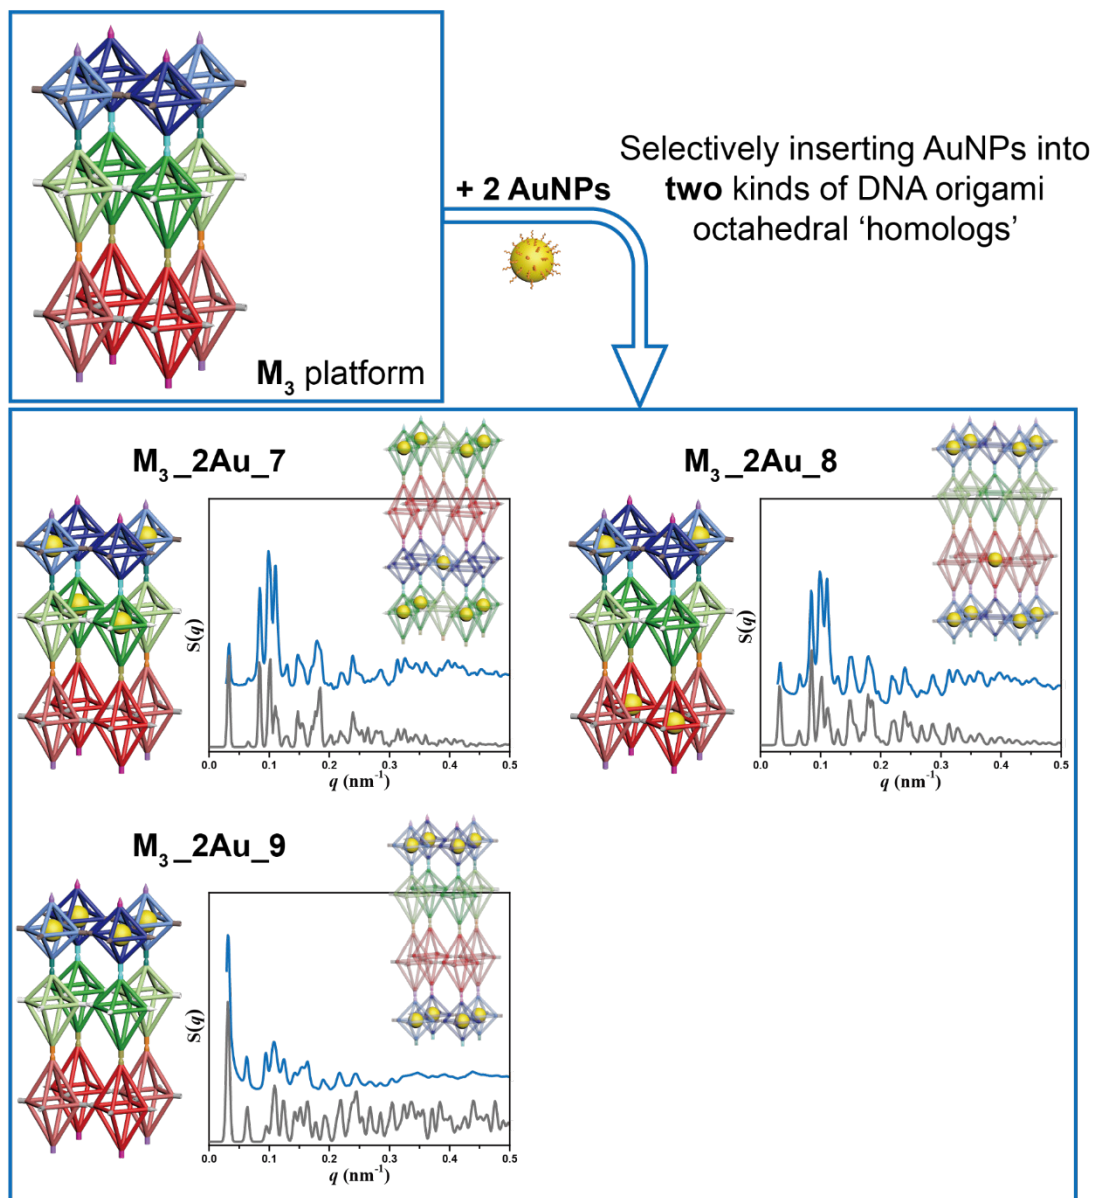

**Figure S38. SAXS characterization of superlattices  $M_3\_2Au\_7$ ,  $M_3\_2Au\_8$ , and  $M_3\_2Au\_9$  constructed on the basis of  $M_3$  platform by selectively inserting AuNPs into two kinds of DNA origami octahedral 'homologs'. From left to right, each panel contains  $M_3$  platform where AuNPs are selectively inserted into two kinds of DNA origami octahedral 'homologs', experimental SAXS data (blue) compared against simulation curve (grey) and corresponding unit cell of AuNPs with external DOFs.**

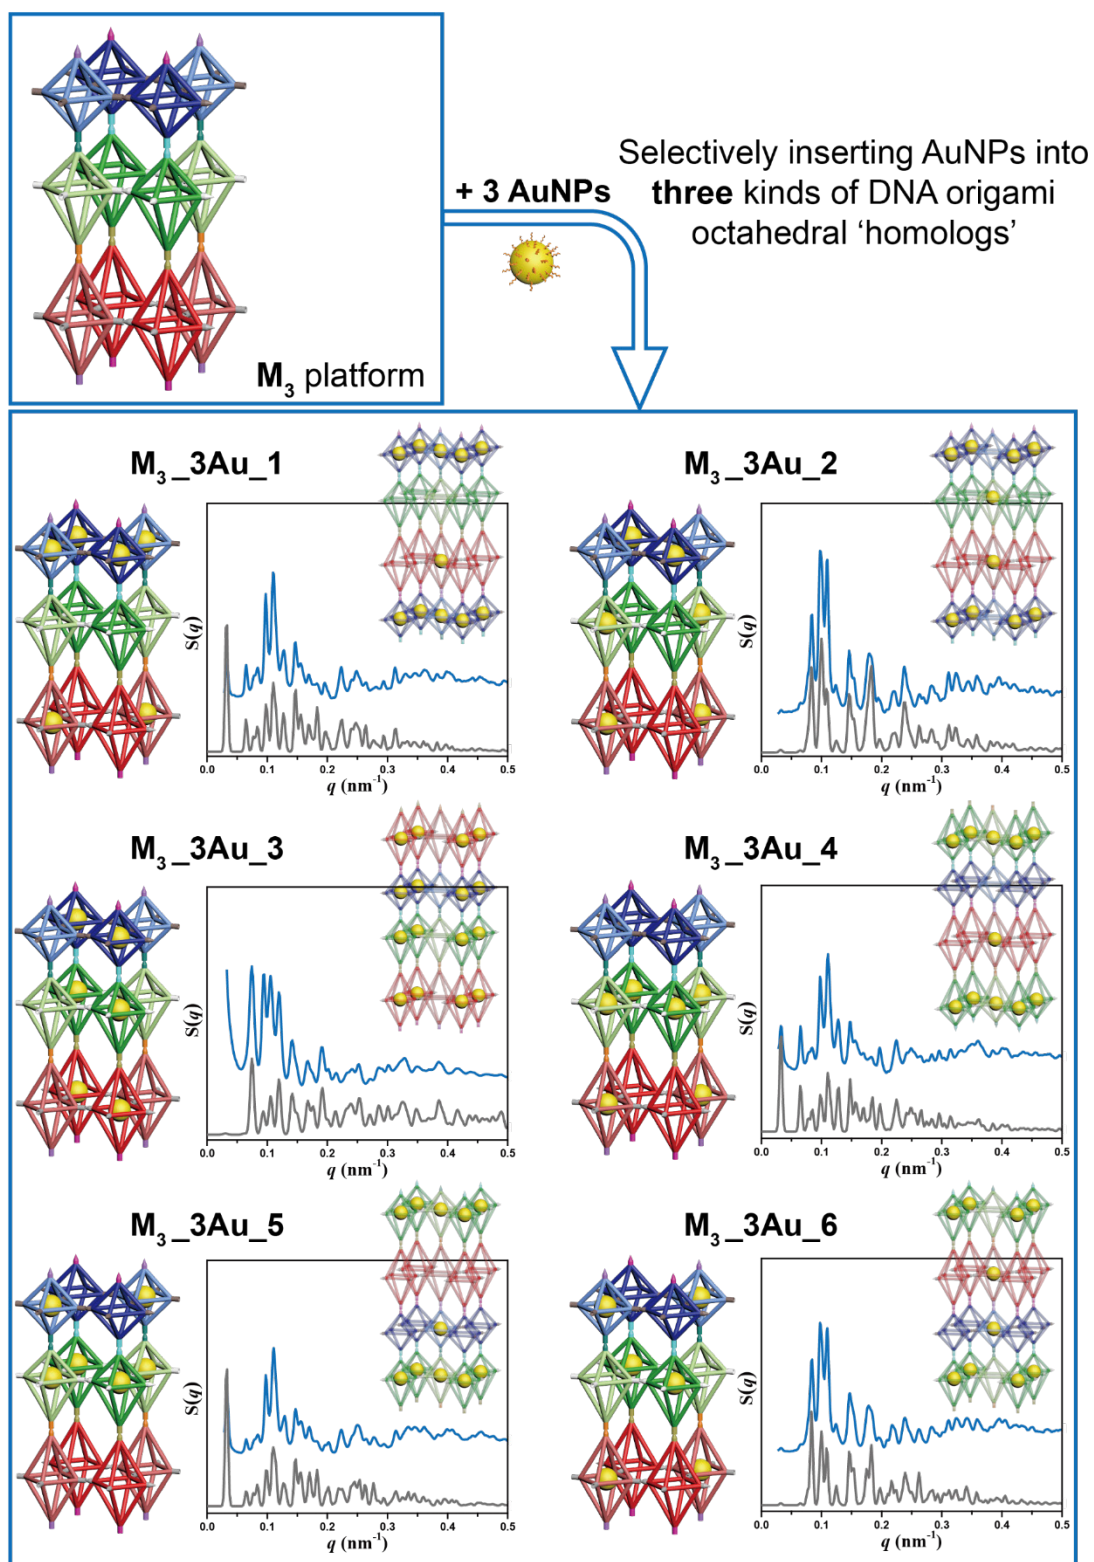

Figure S39. SAXS characterization of superlattices  $M_3\_3Au\_1$ ,  $M_3\_3Au\_2$ ,  $M_3\_3Au\_3$ ,  $M_3\_3Au\_4$ ,  $M_3\_3Au\_5$ , and  $M_3\_3Au\_6$  constructed on the basis of  $M_3$  platform by selectively inserting AuNPs into three kinds of DNA origami octahedral ‘homologs’. From left to right, each panel contains  $M_3$  platform where



AuNPs are selectively inserted into three kinds of DNA origami octahedral ‘homologs’, experimental SAXS data (blue) compared against simulation curve (grey) and corresponding unit cell of AuNPs with external DOFs.

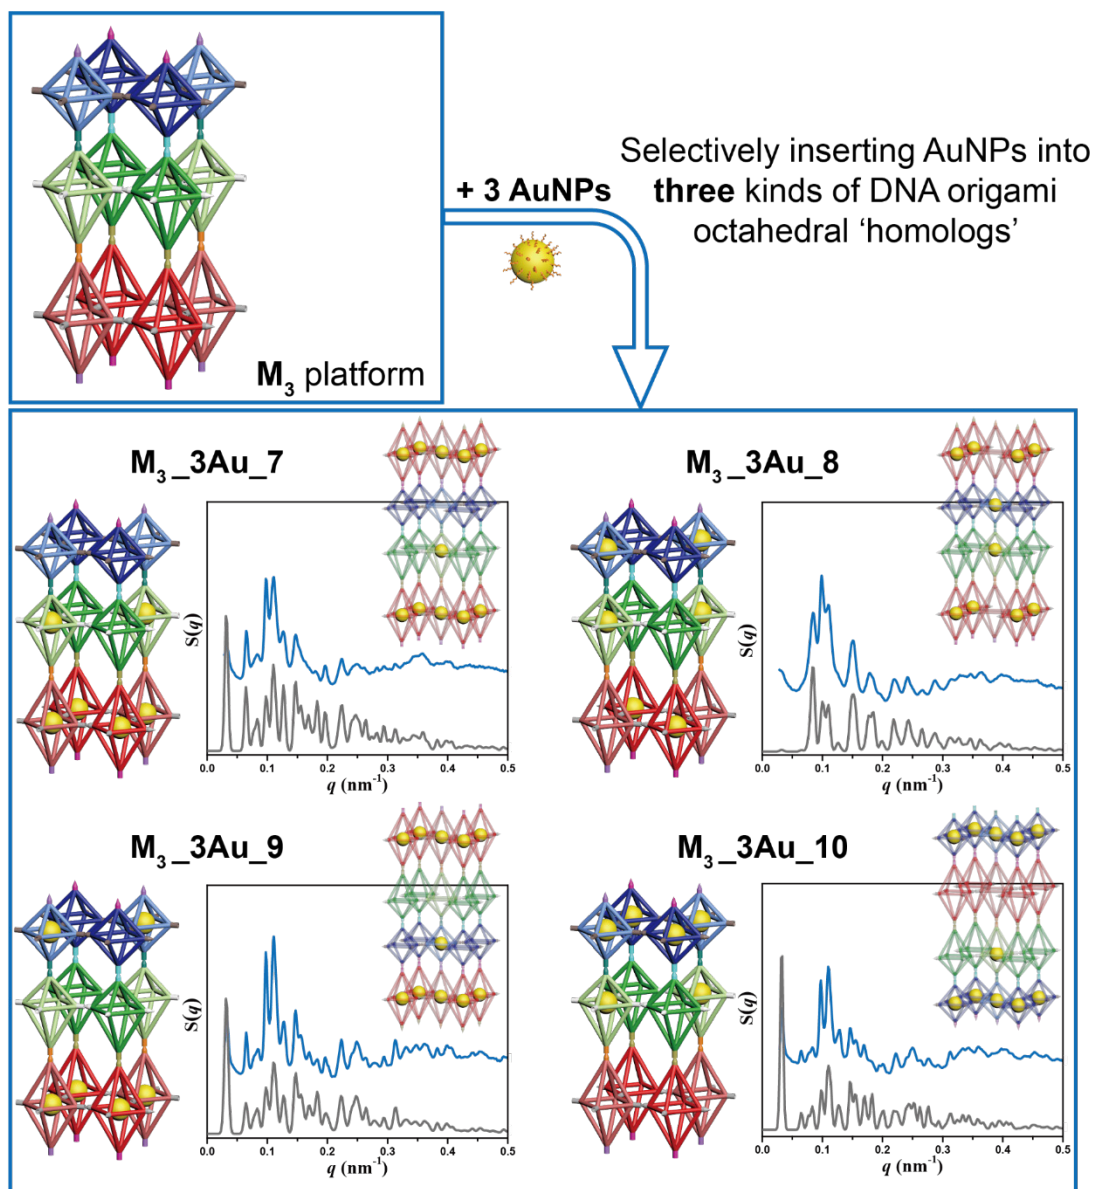

**Figure S40.** SAXS characterization of superlattices  $M_3\_3Au\_7$ ,  $M_3\_3Au\_8$ ,  $M_3\_3Au\_9$  and  $M_3\_3Au\_10$  constructed on the basis of  $M_3$  platform by selectively inserting AuNPs into three kinds of DNA origami octahedral 'homologs'. From left to right, each panel contains  $M_3$  platform where AuNPs are selectively inserted into three kinds of DNA origami octahedral 'homologs', experimental SAXS data (blue) compared against simulation curve (grey) and corresponding unit cell of AuNPs with external DOFs.

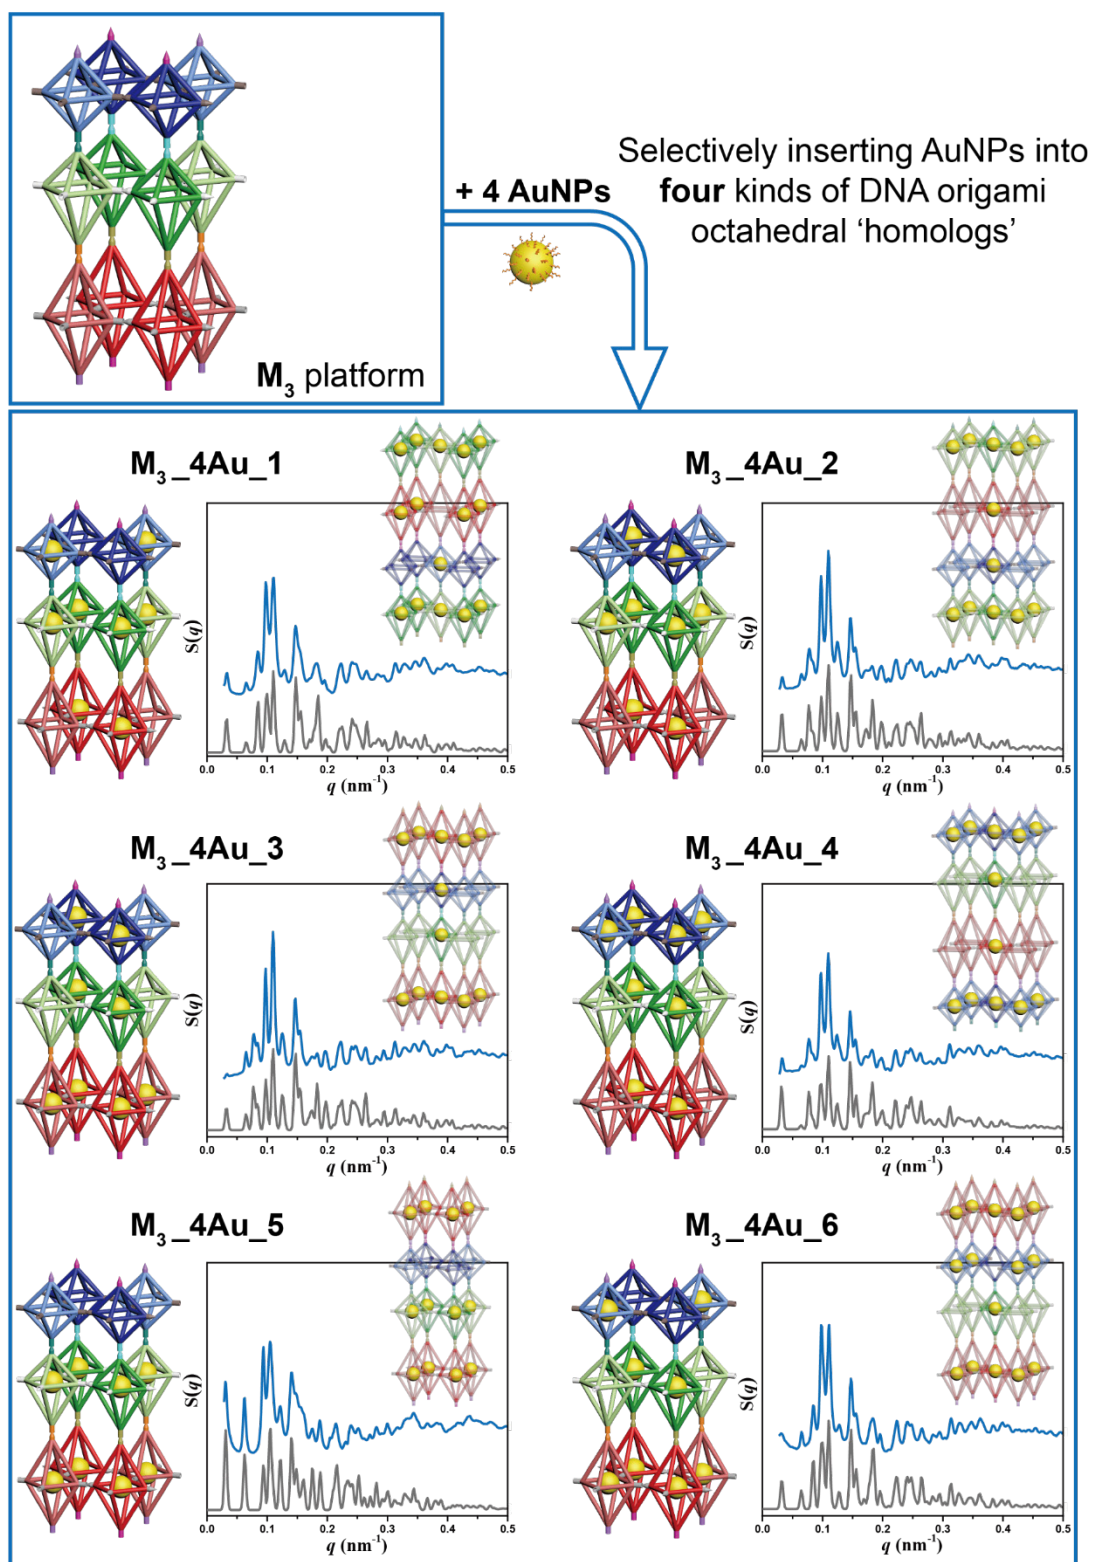

Figure S41. SAXS characterization of superlattices  $M_3\_4Au\_1$ ,  $M_3\_4Au\_2$ ,  $M_3\_4Au\_3$ ,  $M_3\_4Au\_4$ ,  $M_3\_4Au\_5$  and  $M_3\_4Au\_6$  constructed on the basis of  $M_3$  platform by selectively inserting AuNPs into four kinds of DNA origami octahedral 'homologs'. From left to right, each panel contains  $M_3$  platform where

AuNPs are selectively inserted into four kinds of DNA origami octahedral ‘homologs’, experimental SAXS data (blue) compared against simulation curve (grey) and corresponding unit cell of AuNPs with external DOFs.

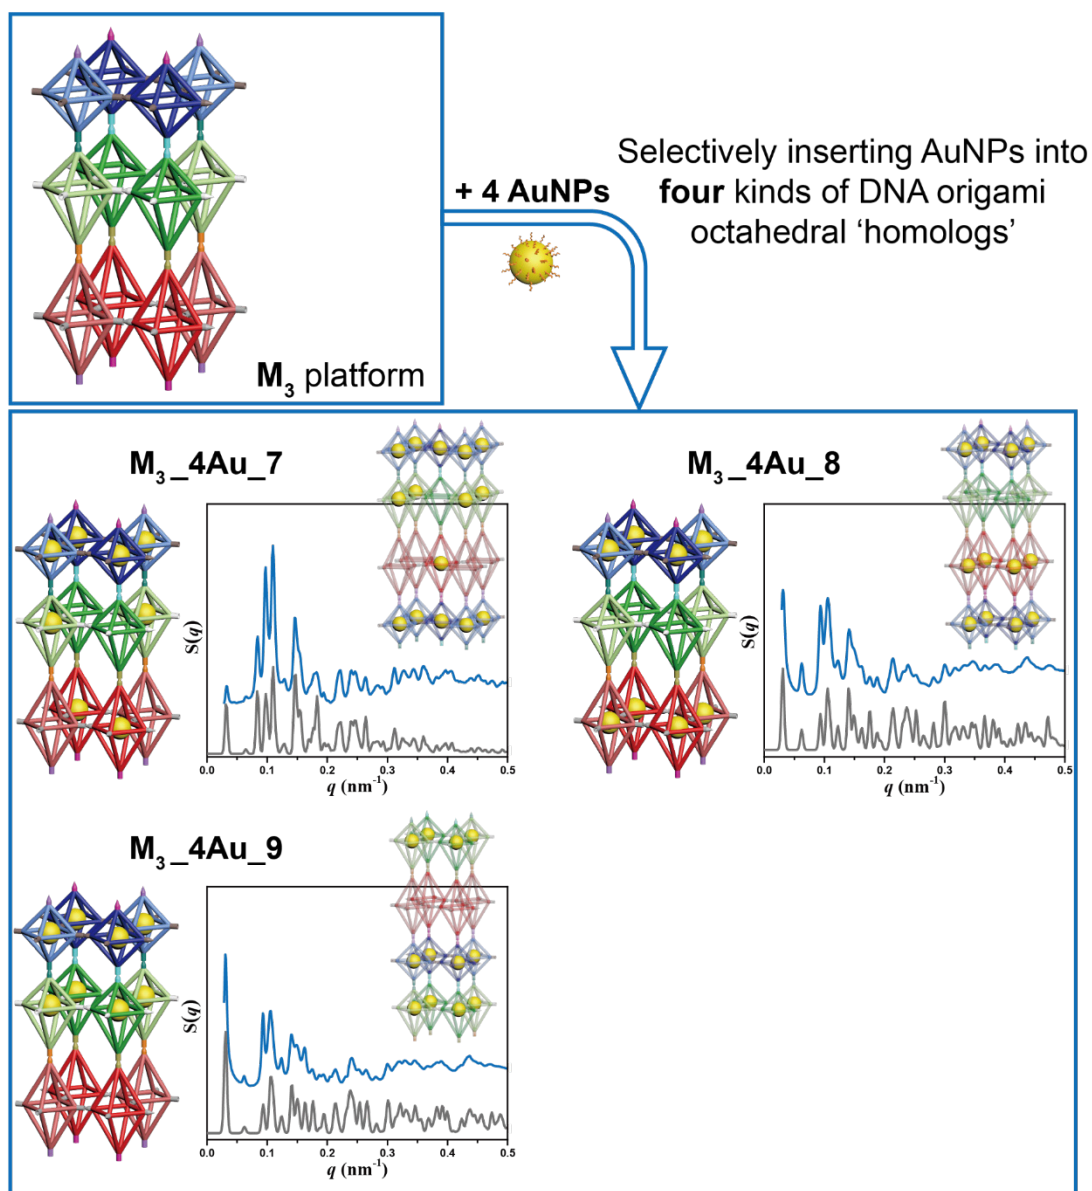

**Figure S42. SAXS characterization of superlattices  $M_3\_4Au\_7$ ,  $M_3\_4Au\_8$  and  $M_3\_4Au\_9$  constructed on the basis of  $M_3$  platform by selectively inserting AuNPs into four kinds of DNA origami octahedral 'homologs'. From left to right, each panel contains  $M_3$  platform where AuNPs are selectively inserted into four kinds of DNA origami octahedral 'homologs', experimental SAXS data (blue) compared against simulation curve (grey) and corresponding unit cell of AuNPs with external DOFs.**

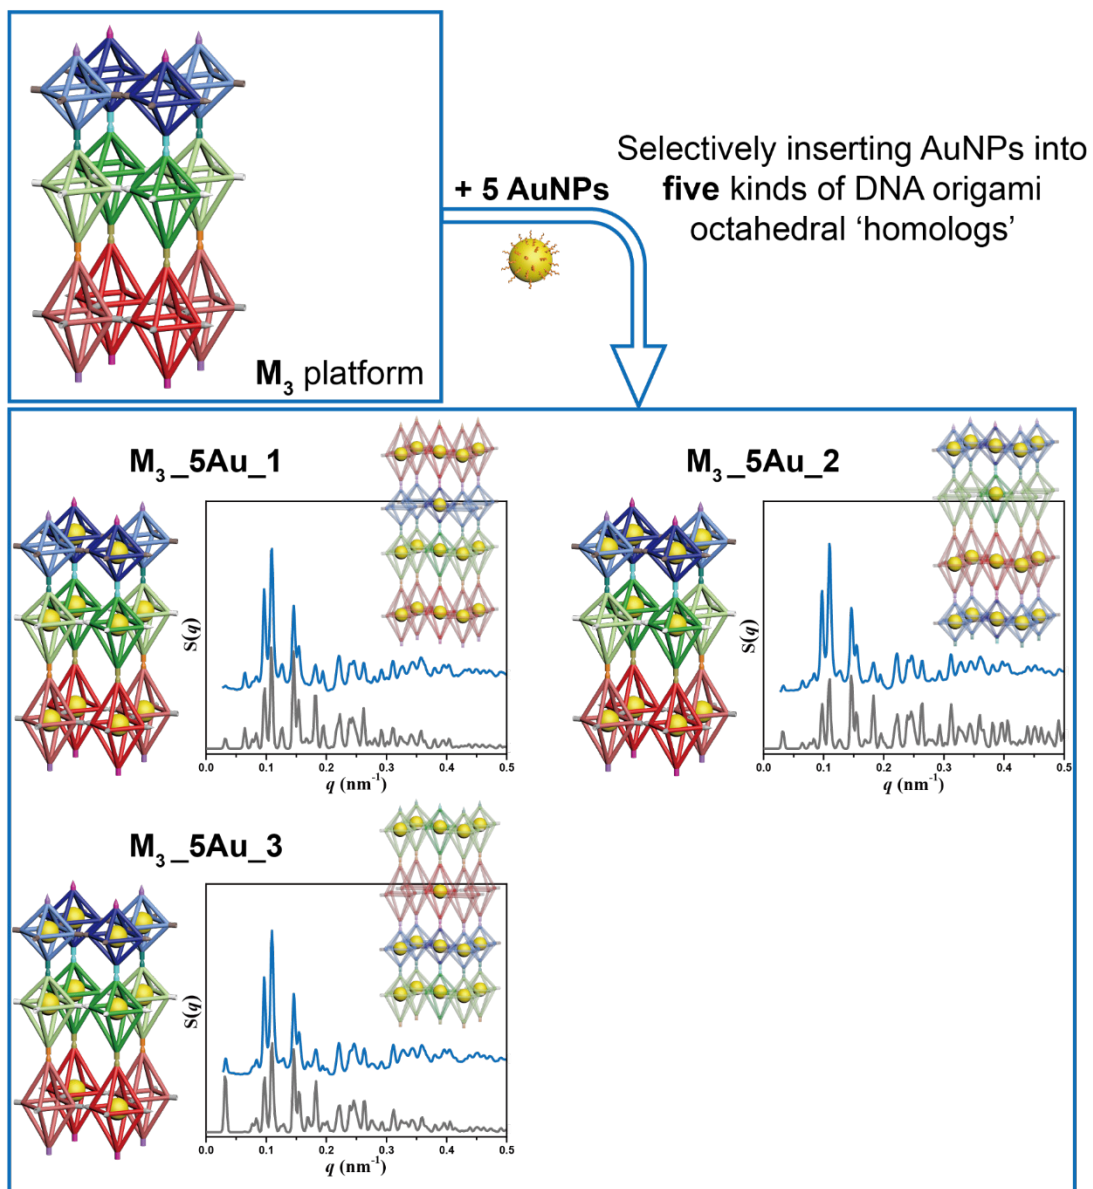

**Figure S43. SAXS characterization of superlattices  $M_3\_5Au\_1$ ,  $M_3\_5Au\_2$  and  $M_3\_5Au\_3$  constructed on the basis of  $M_3$  platform by selectively inserting AuNPs into five kinds of DNA origami octahedral 'homologs'. From left to right, each panel contains  $M_3$  platform where AuNPs are selectively inserted into five kinds of DNA origami octahedral 'homologs', experimental SAXS data (blue) compared against simulation curve (grey) and corresponding unit cell of AuNPs with external DOFs.**

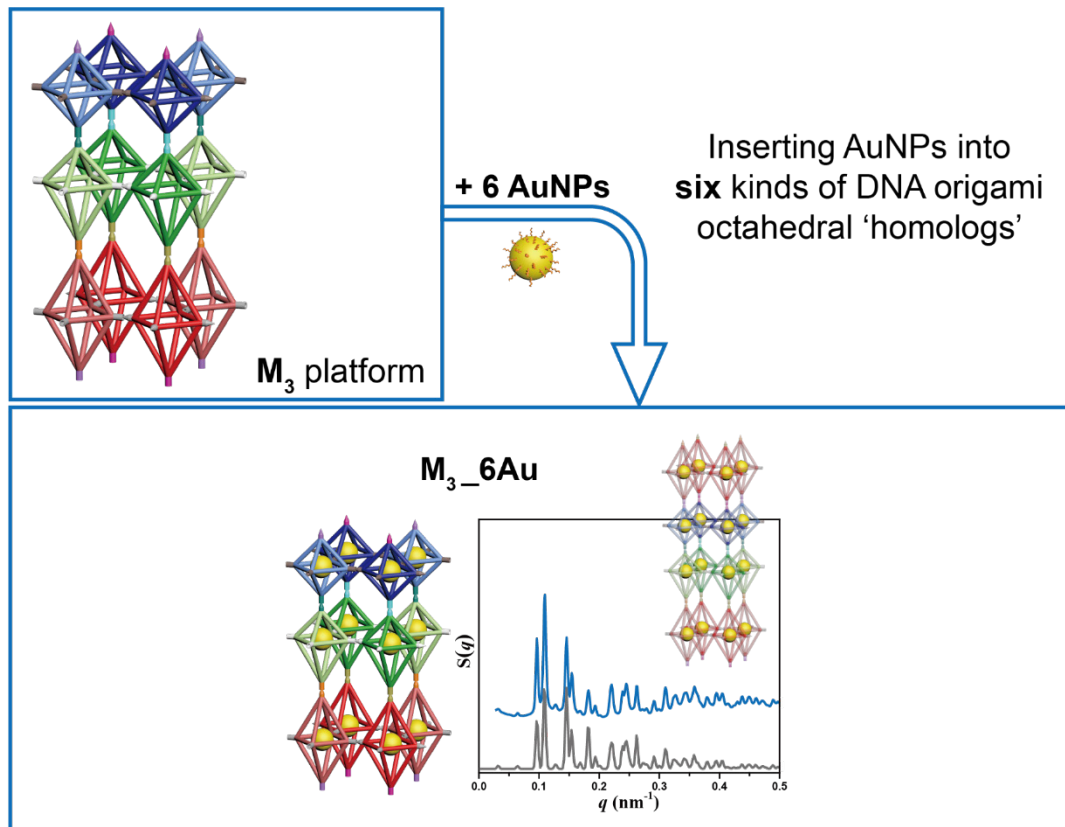

**Figure S44. SAXS characterization of superlattice  $M_3\_6Au$  constructed on the basis of  $M_3$  platform by inserting AuNPs into all six kinds of DNA origami octahedral ‘homologs’.** From left to right, the panel contains  $M_3$  platform where AuNPs are inserted into all six kinds of DNA origami octahedral ‘homologs’, experimental SAXS data (blue) compared against simulation curve (grey) and corresponding unit cell of AuNPs with external DOFs.



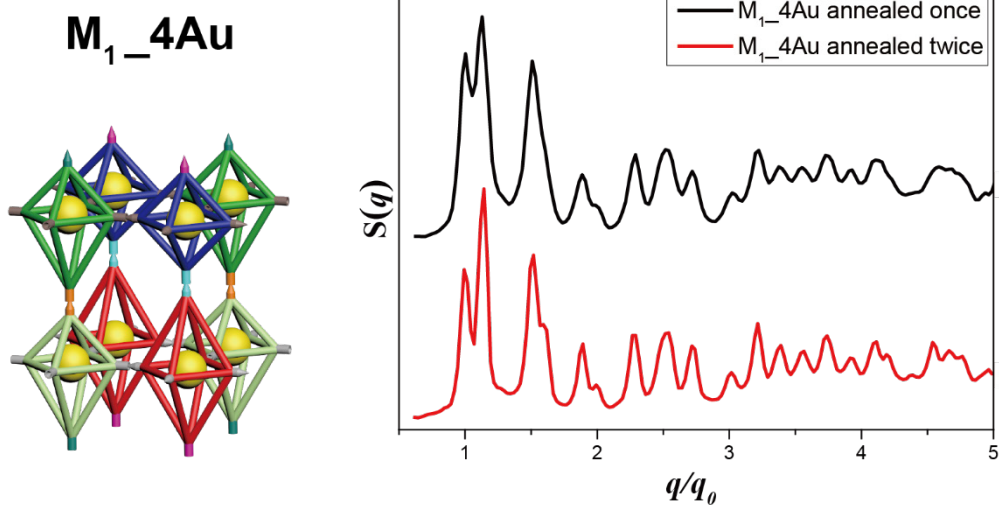

**Figure S45. SAXS results of M<sub>1</sub>\_4Au with one cycle of the annealing process (black curve) and two cycles of the annealing process (red curve).**



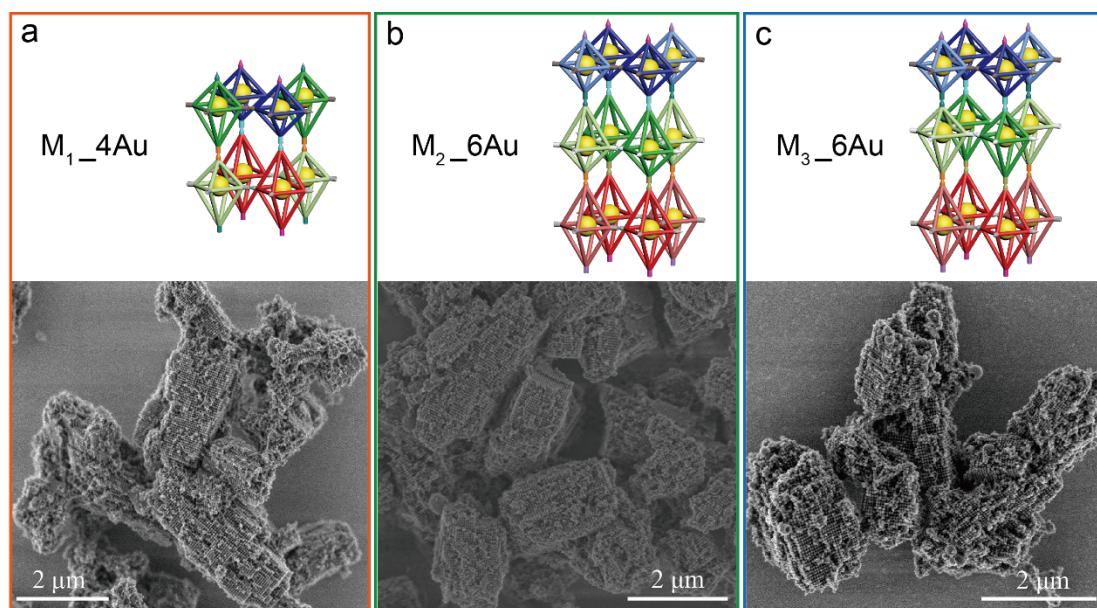

**Figure S46. SEM characterization of nanoparticle superlattices M<sub>1</sub>\_4Au (a), M<sub>2</sub>\_6Au (b) and M<sub>3</sub>\_6Au (c) at low magnification.** Each panel contains the model of nanoparticle superlattice (up) and corresponding SEM image at low magnification (bottom). Scale bars, 2 μm.

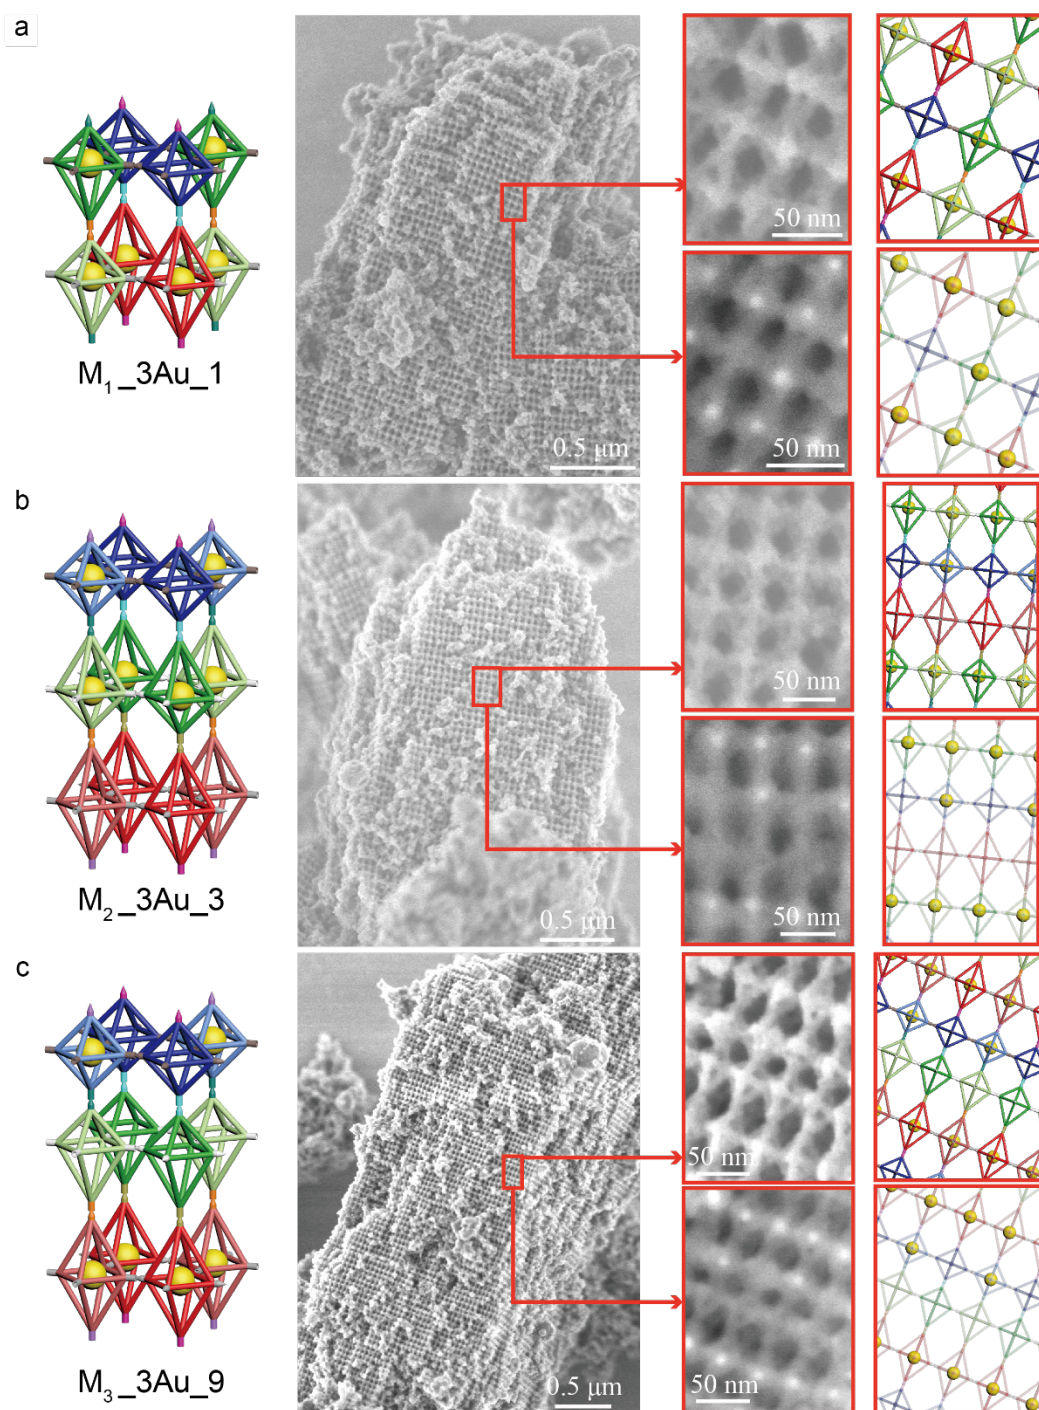

**Figure S47. SEM characterization of nanoparticle superlattices  $M_1\_3Au\_1$  (a),  $M_2\_3Au\_3$  (b) and  $M_3\_3Au\_9$  (c).** From left to right: each panel contains the model of nanoparticle superlattice; SEM image at low magnification; two close-up views of the same region framed in red boxes acquired by different probes with corresponding models shown on the right. The signals of AuNPs were found to be only in specific DNA origami octahedral ‘homologs’ consistent with the expected, which provide better identification of the DNA origami octahedral ‘homologs’. Scale bars,  $0.5\ \mu\text{m}$  (low) and

50 nm (high).

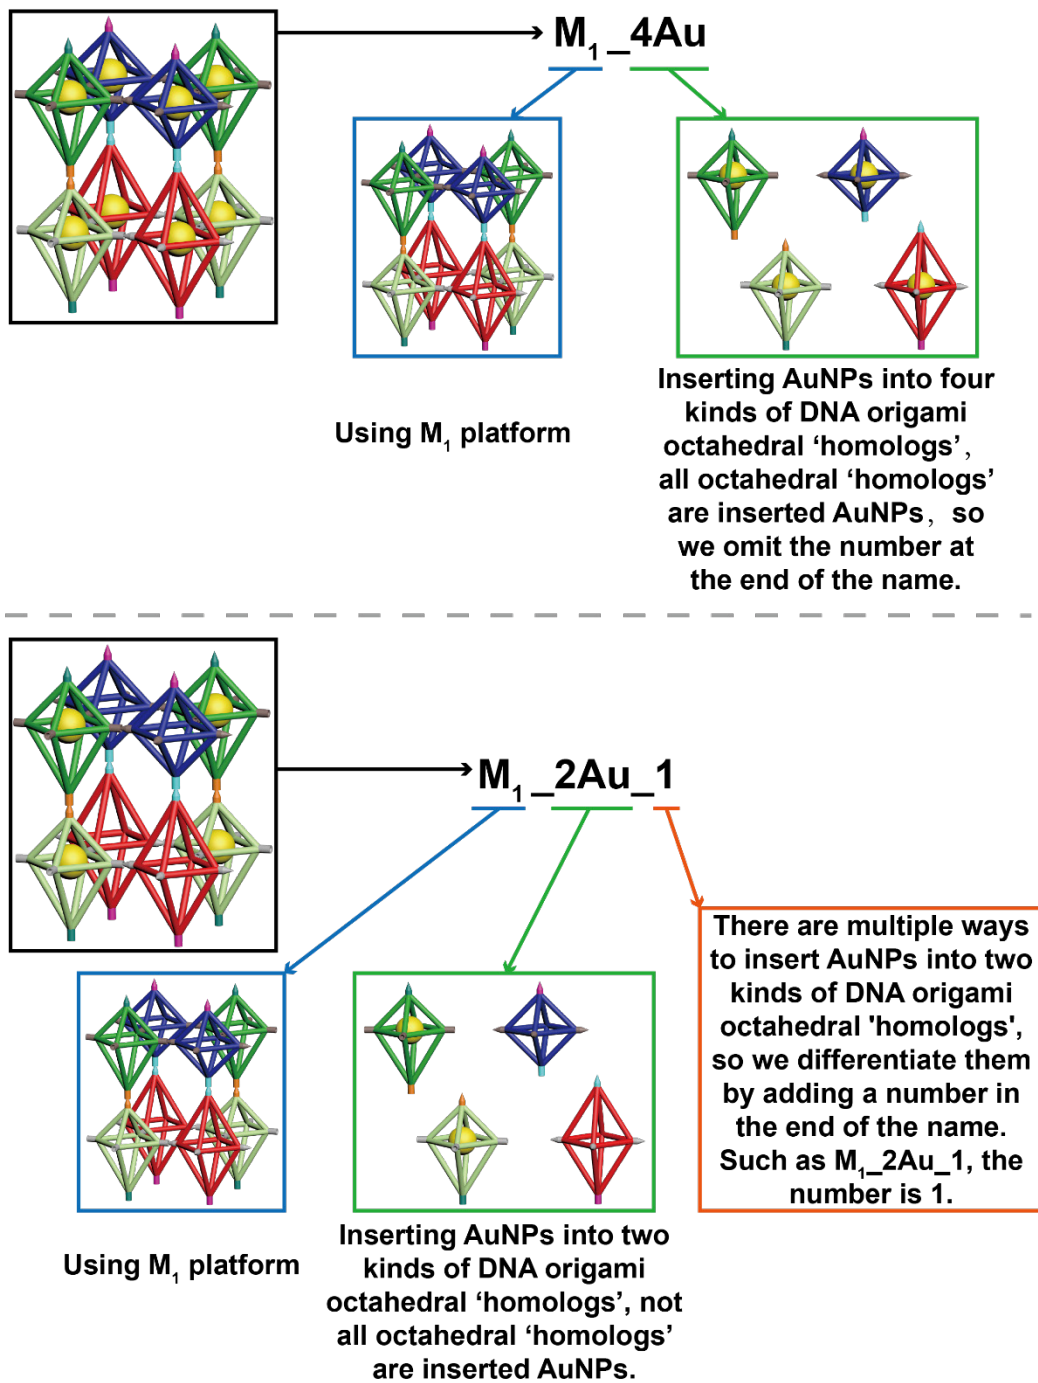

Figure S48. Schematic of the detailed definition of the nanoparticle superlattice name in the main text.

### III. Supplementary Tables

| DNA origami platforms | Type of AuNPs superlattices | Total type of AuNPs superlattices |
|-----------------------|-----------------------------|-----------------------------------|
| $M_1$                 | 6                           | 38                                |
| $M_2$                 | 12                          |                                   |
| $M_3$                 | 28                          |                                   |

**Table S1. Type of the AuNP superlattices fabricated respectively based on  $M_1$ ,  $M_2$  and  $M_3$  platforms.** The total type of AuNPs superlattices is 38 instead of 46 (6+12+28) due to the repeating types of lattices fabricated based on the three different DNA origami platforms.

| DNA origami platforms | Number of DOF/NP complex superlattices (considering the equivalence of crystal structures*) | Total | Number of DOF/NP complex superlattices (ignoring the equivalence of crystal structures) | Total |
|-----------------------|---------------------------------------------------------------------------------------------|-------|-----------------------------------------------------------------------------------------|-------|
| $M_1$                 | 15                                                                                          | 85    | 15                                                                                      | 141   |
| $M_2$                 | 35                                                                                          |       | 63                                                                                      |       |
| $M_3$                 | 35                                                                                          |       | 63                                                                                      |       |

**Table S2. Number of the DOF/NP complex superlattices fabricated respectively based on  $M_1$ ,  $M_2$  and  $M_3$  platforms under different classification criteria.**

\* See Figure S22 for details.

| Superlattices                    | Parameters of unit cell                                                 | Coordinates of AuNPs                       |
|----------------------------------|-------------------------------------------------------------------------|--------------------------------------------|
| M <sub>1_1</sub> Au <sub>1</sub> | $\alpha = \beta = \gamma = 90^\circ$<br>a = b = 79.80 nm, c = 128.50 nm | (0, 0, 0)                                  |
| M <sub>1_1</sub> Au <sub>2</sub> | $\alpha = \beta = \gamma = 90^\circ$<br>a = b = 78.20 nm, c = 127.00 nm | (0, 0, 0)                                  |
| M <sub>1_1</sub> Au <sub>3</sub> | $\alpha = \beta = \gamma = 90^\circ$<br>a = b = 80.70 nm, c = 129.00 nm | (0, 0, 0)                                  |
| M <sub>1_1</sub> Au <sub>4</sub> | $\alpha = \beta = \gamma = 90^\circ$<br>a = b = 80.20 nm, c = 128.40 nm | (0, 0, 0)                                  |
| M <sub>1_2</sub> Au <sub>1</sub> | $\alpha = \beta = \gamma = 90^\circ$<br>a = b = 80.40 nm, c = 64.50 nm  | (0, 0, 0)                                  |
| M <sub>1_2</sub> Au <sub>2</sub> | $\alpha = \beta = \gamma = 90^\circ$<br>a = b = 80.10 nm, c = 128.70 nm | (0, 0, 0) (0.5, 0.5, 0.5)                  |
| M <sub>1_2</sub> Au <sub>3</sub> | $\alpha = \beta = \gamma = 90^\circ$<br>a = b = 80.90 nm, c = 64.80 nm  | (0, 0, 0)                                  |
| M <sub>1_2</sub> Au <sub>4</sub> | $\alpha = \beta = \gamma = 90^\circ$<br>a = b = 57.10 nm, c = 128.00 nm | (0, 0, 0)                                  |
| M <sub>1_2</sub> Au <sub>5</sub> | $\alpha = \beta = \gamma = 90^\circ$<br>a = b = 57.20 nm, c = 129.00 nm | (0, 0, 0)                                  |
| M <sub>1_2</sub> Au <sub>6</sub> | $\alpha = \beta = \gamma = 90^\circ$<br>a = b = 80.60 nm, c = 129.20 nm | (0, 0, 0) (0.5, 0.5, 0.5)                  |
| M <sub>1_3</sub> Au <sub>1</sub> | $\alpha = \beta = \gamma = 90^\circ$<br>a = b = 80.50 nm, c = 129.90 nm | (0, 0, 0) (0.5, 0.5, 0)<br>(0.5, 0.5, 0.5) |
| M <sub>1_3</sub> Au <sub>2</sub> | $\alpha = \beta = \gamma = 90^\circ$<br>a = b = 80.50 nm, c = 129.80 nm | (0, 0, 0) (0.5, 0.5, 0)<br>(0.5, 0.5, 0.5) |
| M <sub>1_3</sub> Au <sub>3</sub> | $\alpha = \beta = \gamma = 90^\circ$<br>a = b = 80.40 nm, c = 129.80 nm | (0, 0, 0) (0.5, 0.5, 0)<br>(0.5, 0.5, 0.5) |
| M <sub>1_3</sub> Au <sub>4</sub> | $\alpha = \beta = \gamma = 90^\circ$<br>a = b = 80.50 nm, c = 129.90 nm | (0, 0, 0) (0.5, 0.5, 0)<br>(0.5, 0.5, 0.5) |
| M <sub>1_4</sub> Au              | $\alpha = \beta = \gamma = 90^\circ$<br>a = b = 57.50 nm, c = 65.00 nm  | (0, 0, 0)                                  |

**Table S3. Parameters of superlattices M<sub>1\_1</sub>Au<sub>1</sub> to M<sub>1\_4</sub>Au, including the parameters of unit cells and the coordinates of AuNPs within unit cells.**

| Superlattices         | Parameters of unit cell                                                 | Coordinates of AuNPs        |
|-----------------------|-------------------------------------------------------------------------|-----------------------------|
| M <sub>2</sub> _1Au_1 | $\alpha = \beta = \gamma = 90^\circ$<br>a = b = 80.20 nm, c = 189.60 nm | (0, 0, 0)                   |
| M <sub>2</sub> _1Au_2 | $\alpha = \beta = \gamma = 90^\circ$<br>a = b = 81.20 nm, c = 190.60 nm | (0, 0, 0)                   |
| M <sub>2</sub> _1Au_3 | $\alpha = \beta = \gamma = 90^\circ$<br>a = b = 81.10 nm, c = 191.60 nm | (0, 0, 0)                   |
| M <sub>2</sub> _2Au_1 | $\alpha = \beta = \gamma = 90^\circ$<br>a = b = 80.90 nm, c = 193.00 nm | (0, 0, 0) (0.5, 0.5, 0.333) |
| M <sub>2</sub> _2Au_2 | $\alpha = \beta = \gamma = 90^\circ$<br>a = b = 81.30 nm, c = 191.80 nm | (0, 0, 0) (0, 0, 0.333)     |
| M <sub>2</sub> _2Au_3 | $\alpha = \beta = \gamma = 90^\circ$<br>a = b = 80.70 nm, c = 190.80 nm | (0, 0, 0) (0, 0, 0.333)     |
| M <sub>2</sub> _2Au_4 | $\alpha = \beta = \gamma = 90^\circ$<br>a = b = 80.30 nm, c = 191.80 nm | (0, 0, 0) (0, 0, 0.333)     |
| M <sub>2</sub> _2Au_5 | $\alpha = \beta = \gamma = 90^\circ$<br>a = b = 57.40 nm, c = 191.20 nm | (0, 0, 0)                   |
| M <sub>2</sub> _2Au_6 | $\alpha = \beta = \gamma = 90^\circ$<br>a = b = 80.90 nm, c = 191.10 nm | (0, 0, 0) (0.5, 0.5, 0.333) |
| M <sub>2</sub> _2Au_7 | $\alpha = \beta = \gamma = 90^\circ$<br>a = b = 80.50 nm, c = 191.60 nm | (0, 0, 0) (0.5, 0.5, 0.333) |
| M <sub>2</sub> _2Au_8 | $\alpha = \beta = \gamma = 90^\circ$<br>a = b = 57.10 nm, c = 190.30 nm | (0, 0, 0)                   |
| M <sub>2</sub> _2Au_9 | $\alpha = \beta = \gamma = 90^\circ$<br>a = b = 57.40 nm, c = 191.30 nm | (0, 0, 0)                   |

**Table S4. Parameters of superlattices M<sub>2</sub>\_1Au\_1 to M<sub>2</sub>\_2Au\_9, including the parameters of unit cells and the coordinates of AuNPs within unit cells.**

| <b>Superlattices</b>   | <b>Parameters of unit cell</b>                                          | <b>Coordinates of AuNPs</b>                      |
|------------------------|-------------------------------------------------------------------------|--------------------------------------------------|
| M <sub>2</sub> _3Au_1  | $\alpha = \beta = \gamma = 90^\circ$<br>a = b = 80.70 nm, c = 64.50 nm  | (0, 0, 0)                                        |
| M <sub>2</sub> _3Au_2  | $\alpha = \beta = \gamma = 90^\circ$<br>a = b = 81.20 nm, c = 192.70 nm | (0, 0, 0) (0.5, 0.5, 0)<br>(0.5, 0.5, 0.333)     |
| M <sub>2</sub> _3Au_3  | $\alpha = \beta = \gamma = 90^\circ$<br>a = b = 80.90 nm, c = 193.50 nm | (0, 0, 0) (0.5, 0.5, 0)<br>(0.5, 0.5, 0.333)     |
| M <sub>2</sub> _3Au_4  | $\alpha = \beta = \gamma = 90^\circ$<br>a = b = 80.60 nm, c = 193.80 nm | (0, 0, 0) (0.5, 0.5, 0.333)<br>(0.5, 0.5, 0.666) |
| M <sub>2</sub> _3Au_5  | $\alpha = \beta = \gamma = 90^\circ$<br>a = b = 81.00 nm, c = 193.20 nm | (0, 0, 0) (0.5, 0.5, 0)<br>(0.5, 0.5, 0.333)     |
| M <sub>2</sub> _3Au_6  | $\alpha = \beta = \gamma = 90^\circ$<br>a = b = 80.90 nm, c = 193.80 nm | (0, 0, 0) (0.5, 0.5, 0.333)<br>(0.5, 0.5, 0.666) |
| M <sub>2</sub> _3Au_7  | $\alpha = \beta = \gamma = 90^\circ$<br>a = b = 81.30 nm, c = 192.40 nm | (0, 0, 0) (0.5, 0.5, 0)<br>(0.5, 0.5, 0.333)     |
| M <sub>2</sub> _3Au_8  | $\alpha = \beta = \gamma = 90^\circ$<br>a = b = 80.60 nm, c = 193.30 nm | (0, 0, 0) (0.5, 0.5, 0.333)<br>(0.5, 0.5, 0.666) |
| M <sub>2</sub> _3Au_9  | $\alpha = \beta = \gamma = 90^\circ$<br>a = b = 81.30 nm, c = 193.10 nm | (0, 0, 0) (0.5, 0.5, 0)<br>(0.5, 0.5, 0.333)     |
| M <sub>2</sub> _3Au_10 | $\alpha = \beta = \gamma = 90^\circ$<br>a = b = 80.70 nm, c = 192.50 nm | (0, 0, 0) (0.5, 0.5, 0)<br>(0.5, 0.5, 0.333)     |

**Table S5. Parameters of superlattices M<sub>2</sub>\_3Au\_1 to M<sub>2</sub>\_3Au\_10, including the parameters of unit cells and the coordinates of AuNPs within unit cells.**



| Superlattices         | Parameters of unit cell                                                 | Coordinates of AuNPs                                                            |
|-----------------------|-------------------------------------------------------------------------|---------------------------------------------------------------------------------|
| M <sub>2</sub> _4Au_1 | $\alpha = \beta = \gamma = 90^\circ$<br>a = b = 81.20 nm, c = 193.50 nm | (0, 0, 0) (0.5, 0.5, 0)<br>(0.5, 0.5, 0.333) (0.5, 0.5, 0.666)                  |
| M <sub>2</sub> _4Au_2 | $\alpha = \beta = \gamma = 90^\circ$<br>a = b = 80.60 nm, c = 192.10 nm | (0, 0, 0) (0.5, 0.5, 0)<br>(0.5, 0.5, 0.333) (0.5, 0.5, 0.666)                  |
| M <sub>2</sub> _4Au_3 | $\alpha = \beta = \gamma = 90^\circ$<br>a = b = 80.80 nm, c = 193.30 nm | (0, 0, 0) (0.5, 0.5, 0)<br>(0.5, 0.5, 0.333) (0.5, 0.5, 0.666)                  |
| M <sub>2</sub> _4Au_4 | $\alpha = \beta = \gamma = 90^\circ$<br>a = b = 57.60 nm, c = 192.80 nm | (0, 0, 0) (0, 0, 0.333)                                                         |
| M <sub>2</sub> _4Au_5 | $\alpha = \beta = \gamma = 90^\circ$<br>a = b = 81.80 nm, c = 191.60 nm | (0, 0, 0) (0.5, 0.5, 0)<br>(0.5, 0.5, 0.333) (0, 0, 0.666)                      |
| M <sub>2</sub> _4Au_6 | $\alpha = \beta = \gamma = 90^\circ$<br>a = b = 81.50 nm, c = 191.30 nm | (0, 0, 0) (0.5, 0.5, 0)<br>(0.5, 0.5, 0.333) (0, 0, 0.666)                      |
| M <sub>2</sub> _4Au_7 | $\alpha = \beta = \gamma = 90^\circ$<br>a = b = 82.10 nm, c = 191.90 nm | (0, 0, 0) (0.5, 0.5, 0)<br>(0.5, 0.5, 0.333) (0, 0, 0.666)                      |
| M <sub>2</sub> _4Au_8 | $\alpha = \beta = \gamma = 90^\circ$<br>a = b = 57.80 nm, c = 192.50 nm | (0, 0, 0) (0, 0, 0.333)                                                         |
| M <sub>2</sub> _4Au_9 | $\alpha = \beta = \gamma = 90^\circ$<br>a = b = 57.80 nm, c = 192.60 nm | (0, 0, 0) (0, 0, 0.333)                                                         |
| M <sub>2</sub> _5Au_1 | $\alpha = \beta = \gamma = 90^\circ$<br>a = b = 81.20 nm, c = 193.00 nm | (0, 0, 0) (0.5, 0.5, 0)<br>(0, 0, 0.333) (0.5, 0.5, 0.333)<br>(0.5, 0.5, 0.666) |
| M <sub>2</sub> _5Au_2 | $\alpha = \beta = \gamma = 90^\circ$<br>a = b = 81.20 nm, c = 192.00 nm | (0, 0, 0) (0.5, 0.5, 0)<br>(0, 0, 0.333) (0.5, 0.5, 0.333)<br>(0.5, 0.5, 0.666) |
| M <sub>2</sub> _5Au_3 | $\alpha = \beta = \gamma = 90^\circ$<br>a = b = 81.20 nm, c = 191.80 nm | (0, 0, 0) (0.5, 0.5, 0)<br>(0, 0, 0.333) (0.5, 0.5, 0.333)<br>(0.5, 0.5, 0.666) |
| M <sub>2</sub> _6Au   | $\alpha = \beta = \gamma = 90^\circ$<br>a = b = 57.60 nm, c = 65.00 nm  | (0, 0, 0)                                                                       |

**Table S6. Parameters of superlattices M<sub>2</sub>\_4Au\_1 to M<sub>2</sub>\_6Au, including the parameters of unit cells and the coordinates of AuNPs within unit cells.**

| Superlattices         | Parameters of unit cell                                                 | Coordinates of AuNPs        |
|-----------------------|-------------------------------------------------------------------------|-----------------------------|
| M <sub>3</sub> _1Au_1 | $\alpha = \beta = \gamma = 90^\circ$<br>a = b = 80.50 nm, c = 195.00 nm | (0, 0, 0)                   |
| M <sub>3</sub> _1Au_2 | $\alpha = \beta = \gamma = 90^\circ$<br>a = b = 81.00 nm, c = 194.00 nm | (0, 0, 0)                   |
| M <sub>3</sub> _1Au_3 | $\alpha = \beta = \gamma = 90^\circ$<br>a = b = 80.50 nm, c = 195.00 nm | (0, 0, 0)                   |
| M <sub>3</sub> _2Au_1 | $\alpha = \beta = \gamma = 90^\circ$<br>a = b = 56.10 nm, c = 188.00 nm | (0, 0, 0)                   |
| M <sub>3</sub> _2Au_2 | $\alpha = \beta = \gamma = 90^\circ$<br>a = b = 80.00 nm, c = 192.00 nm | (0, 0, 0) (0, 0, 0.298)     |
| M <sub>3</sub> _2Au_3 | $\alpha = \beta = \gamma = 90^\circ$<br>a = b = 80.00 nm, c = 191.50 nm | (0, 0, 0) (0, 0, 0.369)     |
| M <sub>3</sub> _2Au_4 | $\alpha = \beta = \gamma = 90^\circ$<br>a = b = 81.50 nm, c = 192.00 nm | (0, 0, 0) (0, 0, 0.333)     |
| M <sub>3</sub> _2Au_5 | $\alpha = \beta = \gamma = 90^\circ$<br>a = b = 57.50 nm, c = 189.52 nm | (0, 0, 0)                   |
| M <sub>3</sub> _2Au_6 | $\alpha = \beta = \gamma = 90^\circ$<br>a = b = 81.00 nm, c = 190.00 nm | (0, 0, 0) (0.5, 0.5, 0.369) |
| M <sub>3</sub> _2Au_7 | $\alpha = \beta = \gamma = 90^\circ$<br>a = b = 81.00 nm, c = 192.00 nm | (0, 0, 0) (0.5, 0.5, 0.298) |
| M <sub>3</sub> _2Au_8 | $\alpha = \beta = \gamma = 90^\circ$<br>a = b = 80.00 nm, c = 194.00 nm | (0, 0, 0) (0.5, 0.5, 0.333) |
| M <sub>3</sub> _2Au_9 | $\alpha = \beta = \gamma = 90^\circ$<br>a = b = 59.50 nm, c = 197.00 nm | (0, 0, 0)                   |

**Table S7. Parameters of superlattices M<sub>3</sub>\_1Au\_1 to M<sub>3</sub>\_2Au\_9, including the parameters of unit cells and the coordinates of AuNPs within unit cells.**

| Superlattices          | Parameters of unit cell                                                 | Coordinates of AuNPs                             |
|------------------------|-------------------------------------------------------------------------|--------------------------------------------------|
| M <sub>3</sub> _3Au_1  | $\alpha = \beta = \gamma = 90^\circ$<br>a = b = 81.10 nm, c = 192.80 nm | (0, 0, 0) (0.5, 0.5, 0)<br>(0.5, 0.5, 0.333)     |
| M <sub>3</sub> _3Au_2  | $\alpha = \beta = \gamma = 90^\circ$<br>a = b = 81.40 nm, c = 193.50 nm | (0, 0, 0) (0.5, 0.5, 0.333)<br>(0.5, 0.5, 0.702) |
| M <sub>3</sub> _3Au_3  | $\alpha = \beta = \gamma = 90^\circ$<br>a = b = 83.80 nm, c = 201.90 nm | (0, 0, 0) (0, 0, 0.369)<br>(0, 0, 0.667)         |
| M <sub>3</sub> _3Au_4  | $\alpha = \beta = \gamma = 90^\circ$<br>a = b = 80.40 nm, c = 192.50 nm | (0, 0, 0) (0.5, 0.5, 0)<br>(0.5, 0.5, 0.369)     |
| M <sub>3</sub> _3Au_5  | $\alpha = \beta = \gamma = 90^\circ$<br>a = b = 81.40 nm, c = 192.00 nm | (0, 0, 0) (0.5, 0.5, 0)<br>(0.5, 0.5, 0.298)     |
| M <sub>3</sub> _3Au_6  | $\alpha = \beta = \gamma = 90^\circ$<br>a = b = 81.50 nm, c = 193.02 nm | (0, 0, 0) (0.5, 0.5, 0.298)<br>(0.5, 0.5, 0.631) |
| M <sub>3</sub> _3Au_7  | $\alpha = \beta = \gamma = 90^\circ$<br>a = b = 81.00 nm, c = 193.30 nm | (0, 0, 0) (0.5, 0.5, 0)<br>(0.5, 0.5, 0.369)     |
| M <sub>3</sub> _3Au_8  | $\alpha = \beta = \gamma = 90^\circ$<br>a = b = 80.70 nm, c = 191.00 nm | (0, 0, 0) (0.5, 0.5, 0.369)<br>(0.5, 0.5, 0.667) |
| M <sub>3</sub> _3Au_9  | $\alpha = \beta = \gamma = 90^\circ$<br>a = b = 80.80 nm, c = 193.30 nm | (0, 0, 0) (0.5, 0.5, 0)<br>(0.5, 0.5, 0.333)     |
| M <sub>3</sub> _3Au_10 | $\alpha = \beta = \gamma = 90^\circ$<br>a = b = 81.60 nm, c = 192.50 nm | (0, 0, 0) (0.5, 0.5, 0)<br>(0.5, 0.5, 0.298)     |

**Table S8. Parameters of superlattices M<sub>3</sub>\_3Au\_1 to M<sub>3</sub>\_3Au\_10, including the parameters of unit cells and the coordinates of AuNPs within unit cells.**

| Superlattices         | Parameters of unit cell                                                 | Coordinates of AuNPs                                                            |
|-----------------------|-------------------------------------------------------------------------|---------------------------------------------------------------------------------|
| M <sub>3</sub> _4Au_1 | $\alpha = \beta = \gamma = 90^\circ$<br>a = b = 80.50 nm, c = 192.00 nm | (0, 0, 0) (0.5, 0.5, 0)<br>(0.5, 0.5, 0.298) (0, 0, 0.631)                      |
| M <sub>3</sub> _4Au_2 | $\alpha = \beta = \gamma = 90^\circ$<br>a = b = 81.00 nm, c = 192.80 nm | (0, 0, 0) (0.5, 0.5, 0)<br>(0.5, 0.5, 0.298) (0.5, 0.5, 0.631)                  |
| M <sub>3</sub> _4Au_3 | $\alpha = \beta = \gamma = 90^\circ$<br>a = b = 81.00 nm, c = 192.80 nm | (0, 0, 0) (0.5, 0.5, 0)<br>(0.5, 0.5, 0.369) (0.5, 0.5, 0.667)                  |
| M <sub>3</sub> _4Au_4 | $\alpha = \beta = \gamma = 90^\circ$<br>a = b = 80.90 nm, c = 195.30 nm | (0, 0, 0) (0.5, 0.5, 0)<br>(0.5, 0.5, 0.333) (0.5, 0.5, 0.702)                  |
| M <sub>3</sub> _4Au_5 | $\alpha = \beta = \gamma = 90^\circ$<br>a = b = 60.00 nm, c = 200.47 nm | (0, 0, 0) (0, 0, 0.369)                                                         |
| M <sub>3</sub> _4Au_6 | $\alpha = \beta = \gamma = 90^\circ$<br>a = b = 80.60 nm, c = 193.40 nm | (0, 0, 0) (0.5, 0.5, 0)<br>(0.5, 0.5, 0.369) (0, 0, 0.667)                      |
| M <sub>3</sub> _4Au_7 | $\alpha = \beta = \gamma = 90^\circ$<br>a = b = 81.00 nm, c = 194.00 nm | (0, 0, 0) (0.5, 0.5, 0)<br>(0.5, 0.5, 0.333) (0, 0, 0.702)                      |
| M <sub>3</sub> _4Au_8 | $\alpha = \beta = \gamma = 90^\circ$<br>a = b = 59.80 nm, c = 201.30 nm | (0, 0, 0) (0, 0, 0.333)                                                         |
| M <sub>3</sub> _4Au_9 | $\alpha = \beta = \gamma = 90^\circ$<br>a = b = 59.50 nm, c = 201.50 nm | (0, 0, 0) (0, 0, 0.298)                                                         |
| M <sub>3</sub> _5Au_1 | $\alpha = \beta = \gamma = 90^\circ$<br>a = b = 81.60 nm, c = 194.40 nm | (0, 0, 0) (0.5, 0.5, 0)<br>(0, 0, 0.369) (0.5, 0.5, 0.369)<br>(0.5, 0.5, 0.667) |
| M <sub>3</sub> _5Au_2 | $\alpha = \beta = \gamma = 90^\circ$<br>a = b = 81.20 nm, c = 193.80 nm | (0, 0, 0) (0.5, 0.5, 0)<br>(0, 0, 0.333) (0.5, 0.5, 0.333)<br>(0.5, 0.5, 0.702) |
| M <sub>3</sub> _5Au_3 | $\alpha = \beta = \gamma = 90^\circ$<br>a = b = 81.20 nm, c = 194.40 nm | (0, 0, 0) (0.5, 0.5, 0)<br>(0, 0, 0.298) (0.5, 0.5, 0.298)<br>(0.5, 0.5, 0.631) |
| M <sub>3</sub> _6Au   | $\alpha = \beta = \gamma = 90^\circ$<br>a = b = 57.60 nm, c = 195.20 nm | (0, 0, 0) (0, 0, 0.369)<br>(0, 0, 0.667)                                        |

**Table S9. Parameters of superlattices M<sub>3</sub>\_4Au\_1 to M<sub>3</sub>\_6Au, including the parameters of unit cells and the coordinates of AuNPs within unit cells.**
